# Supplementary material for: IL17 Promotes Mammary Tumor Progression by Changing the Behavior of Tumor Cells and Eliciting Tumorigenic Neutrophils Recruitment
Source: Oxford University Press journal article supplement (doi:10.1158/0008-5472.can-15-0054), 2015-07-24
Supplement: 00085472can150054-sup-143458_1_supp_2966390_nnw6kz.xlsx [file 00085472can150054-sup-143458_1_supp_2966390_nnw6kz.xlsx]

## Sheet: Supplementary Table S2
ProbeName	Fold change	GeneSymbol	Entrez_Gene_ID	GeneName
A_52_P616356	2.3907468	Ccr1	12768	chemokine (C-C motif) receptor 1
A_51_P282374	4.2344813	H2-M10.5	224761	histocompatibility 2, M region locus 10.5
A_52_P176013	2.2780817	Irf9	16391	interferon regulatory factor 9
A_51_P507602	2.7571173	Clca4	229927	chloride channel calcium activated 4
A_51_P349751	2.4203513	Scel	64929	sciellin
(+)E1A_r60_a97	3.3948517
A_52_P197046	2.079309
A_52_P252356	2.6428275	Fam122c	73866	family with sequence similarity 122, member C
A_51_P110317	2.1841142	1110019B22Rik	68529	RIKEN cDNA 1110019B22 gene
A_52_P532355	2.5091136	Lin28b	380669	lin-28 homolog B (C. elegans)
A_52_P672602	27651052	Olfr1168	258524	olfactory receptor 1168
A_52_P963598	3.1598647
A_52_P448666	3.0373256
A_51_P124831	2.6969957
A_52_P371541	2.1313257	Hif3a	53417	hypoxia inducible factor 3, alpha subunit
A_52_P166393	2.7934601	Art1	11870	ADP-ribosyltransferase 1
A_51_P209043	2.3547106
A_51_P263965	2.3130493	Hmox1	15368	heme oxygenase (decycling) 1
A_51_P252054	2.0546165	Dnah17	69926	dynein, axonemal, heavy chain 17
A_52_P264571	2.061745	Mcf2l	17207	mcf.2 transforming sequence-like
A_52_P31751	2.136074
A_52_P704340	2.10131
A_52_P682483	2.2507648	Ptprk	19272	protein tyrosine phosphatase, receptor type, K
A_51_P380699	3.3985379	Acsl6	216739	acyl-CoA synthetase long-chain family member 6
A_52_P860158	2.1719267	Focad	230393	focadhesin
A_52_P770791	2.8802373
A_51_P511142	2.226106	Abca14	67928	ATP-binding cassette, sub-family A (ABC1), member 14
A_51_P171486	2.2328756
A_51_P305217	2.0677762	Hoxd1	15429	homeobox D1
A_51_P318860	2.1901536	Zfp9	22750	zinc finger protein 9
A_52_P584704	2.2284577
A_52_P575561	2.7853532
A_52_P630905	2.2918994	Cdh18	320865	cadherin 18
A_52_P216373	2.528133
A_51_P266521	2.4065943	Cdk2	12566	cyclin-dependent kinase 2
(+)E1A_r60_a20	4.1998763
A_52_P21912	3.0103846	4932442A14Rik	320136	RIKEN cDNA 4932442A14 gene
A_51_P433989	2.2327704	Mapk10	26414	mitogen-activated protein kinase 10
A_52_P778486	2.712501	4932412D23Rik	75722	RIKEN cDNA 4932412D23 gene
A_51_P231308	2.385077	Mfng	17305	MFNG O-fucosylpeptide 3-beta-N-acetylglucosaminyltransferase
A_52_P319093	2.183049	Serpina3k	20714	serine (or cysteine) peptidase inhibitor, clade A, member 3K
A_51_P308279	4.4921627	St18	240690	suppression of tumorigenicity 18
A_52_P102642	2.0581014	Trmt1	212528	tRNA methyltransferase 1
A_52_P915042	2.536496	5330421F21Rik	78288	RIKEN cDNA 5330421F21 gene
A_52_P780242	2.255519
A_52_P592835	3.3780427	Gucy1b3	54195	guanylate cyclase 1, soluble, beta 3
A_51_P468629	2.6341755
A_51_P214251	2.3698025	Rnls	67795	renalase, FAD-dependent amine oxidase
A_52_P1083725	2.7434196
A_51_P183882	2.3981962	Tnfsf12	21944	tumor necrosis factor (ligand) superfamily, member 12
A_52_P567050	2.1137402	Slc25a46	67453	solute carrier family 25, member 46
A_51_P201346	2.032764	Mdm2	17246	transformed mouse 3T3 cell double minute 2
A_52_P192369	2.060394	Olfr283	259038	olfactory receptor 283
A_51_P397296	3.9459867	Marveld3	73608	MARVEL (membrane-associating) domain containing 3
A_51_P314547	2.8051796	Serpina3i	628900	serine (or cysteine) peptidase inhibitor, clade A, member 3I
A_51_P351152	2.7381098	Olfr1023	258580	olfactory receptor 1023
A_52_P165315	2.1028647
A_51_P344810	2.9910505
A_52_P651406	2.0250967
A_52_P214370	2.911092
A_51_P173547	2.150358	1700009J07Rik	75188	RIKEN cDNA 1700009J07 gene
A_52_P361471	3.249422	Klra9	16640	killer cell lectin-like receptor subfamily A, member 9
A_51_P248613	3.2739666
A_51_P222125	2.546504
A_52_P755197	3.1666746	D430032J08Rik	319404	RIKEN cDNA D430032J08 gene
A_52_P907553	2.7504966
A_51_P257122	2.641675	4933404O12Rik	66752	RIKEN cDNA 4933404O12 gene
A_51_P419840	2.254208
A_51_P409616	3.0385568	Ostf1	20409	osteoclast stimulating factor 1
A_52_P868235	2.6885471
A_52_P78938	2.1158373	Lmbr1	56873	limb region 1
(+)E1A_r60_a135	4.410609
A_52_P159043	2.6989496
A_51_P509499	2.6048393
A_52_P638041	3.7626934	Ube2dnl1	237009	ubiquitin-conjugating enzyme E2D N-terminal like 1
(+)E1A_r60_a22	4.5714073
A_51_P197116	2.4538147	Ear5	54159	eosinophil-associated, ribonuclease A family, member 5
A_52_P160554	2.1224124
(+)E1A_r60_a104	2.406499
A_52_P593805	2.3094215	Chl1	12661	cell adhesion molecule with homology to L1CAM
A_51_P280657	2.4080007	0610040A22Rik	68376	RIKEN cDNA 0610040A22 gene
(+)E1A_r60_a107	3.9165452
A_52_P73559	2.0089812	Gm7241	638532	predicted pseudogene 7241
A_51_P310963	2.9740884	Vmn1r32	171188	vomeronasal 1 receptor 32
A_52_P444864	2.520607	Smo	319757	smoothened homolog (Drosophila)
A_52_P305792	2.9427576	1700025O08Rik	69984	RIKEN cDNA 1700025O08 gene
A_51_P135389	3.0836596	Zfp474	66758	zinc finger protein 474
A_52_P121683	2.0117924	4921529L05Rik	320178	RIKEN cDNA 4921529L05 gene
A_51_P191400	3.1884265	Ttn	22138	titin
A_52_P562612	2.2013314	Srd5a1	78925	steroid 5 alpha-reductase 1
A_52_P1133481	2.0477514
(+)E1A_r60_n9	2.1843238
A_52_P314299	2.0493157	A930006K02Rik	100503120	RIKEN cDNA A930006K02 gene
A_52_P672689	2.1784425	Btc	12223	betacellulin, epidermal growth factor family member
A_52_P274795	2.3127384
A_51_P378622	2.0897932	0610012H03Rik	74088	RIKEN cDNA 0610012H03 gene
A_52_P523959	2.6289089	Sntg1	71096	syntrophin, gamma 1
A_52_P860410	2.3508205
A_52_P482274	2.1143165	Zfp583	213011	zinc finger protein 583
A_51_P223538	2.5904083
A_51_P359002	3.9634233
A_51_P306263	3.3426535
A_52_P606866	3.6788762	Rrm1	20133	ribonucleotide reductase M1
A_51_P251977	2.2583175	Vmn1r16	171202	vomeronasal 1 receptor 16
A_52_P353068	2.2008848
A_51_P408506	3.0220711	Icam1	15894	intercellular adhesion molecule 1
A_52_P285635	3.2758899	Elmod1	270162	ELMO/CED-12 domain containing 1
A_52_P424666	3.0971692	Pan3	72587	PAN3 polyA specific ribonuclease subunit homolog (S. cerevisiae)
A_51_P193510	2.4925122	A430068E04Rik	319956	RIKEN cDNA A430068E04 gene
A_52_P329652	2.3252134
A_51_P376778	2.0043976	2310003L06Rik	74248	RIKEN cDNA 2310003L06 gene
A_51_P367150	2.6209655	Zbtb21	114565	zinc finger and BTB domain containing 21
A_51_P487108	2.4137049	Rangap1	19387	RAN GTPase activating protein 1
A_52_P436238	2.3030634	Odc1	18263	ornithine decarboxylase, structural 1
A_51_P140585	2.1450496	Iqgap3	404710	IQ motif containing GTPase activating protein 3
A_51_P459176	2.9756181
A_51_P497484	2.0771468	AI118078	244886	expressed sequence AI118078
A_51_P406846	2.7019694	Nipal4	214112	NIPA-like domain containing 4
A_52_P354931	2.4385266
A_51_P440865	2.2234225	Fam110b	242297	family with sequence similarity 110, member B
A_52_P373586	2.0469115
A_52_P1052802	2.2158084
A_52_P492020	2.2112205	Zfp711	245595	zinc finger protein 711
A_52_P1092488	2.4991844
A_51_P475613	2.5255694	Fahd2a	68126	fumarylacetoacetate hydrolase domain containing 2A
A_51_P179492	2.5197074	Fam92a	68099	family with sequence similarity 92, member A
A_52_P331727	2.695323	Thsd7b	210417	thrombospondin, type I, domain containing 7B
A_51_P196444	3.2194169	Foxc2	14234	forkhead box C2
A_51_P291260	2.2863655	Mgam	232714	maltase-glucoamylase
A_51_P213045	2.1529152	Smoc2	64074	SPARC related modular calcium binding 2
A_51_P503131	2.0643325	Wnt11	22411	wingless-related MMTV integration site 11
A_51_P504512	2.1876857	Lyzl6	69444	lysozyme-like 6
A_51_P300324	2.250715	Gprin3	243385	GPRIN family member 3
A_52_P474152	2.0578494	Onecut3	246086	one cut domain, family member 3
A_52_P187677	2.0938895
A_52_P235003	2.0065725
A_52_P1012225	2.7525396
A_51_P428676	2.4035075
A_52_P525107	6.95039	Col1a1	12842	collagen, type I, alpha 1
A_52_P50325	2.0216432	Arhgdig	14570	Rho GDP dissociation inhibitor (GDI) gamma
A_51_P367037	2.0535154
A_51_P109258	2.0125208	Cys1	12879	cystin 1
A_52_P39644	2.1322453	Nrxn3	18191	neurexin III
A_51_P363995	2.457344	1700022I11Rik	67317	RIKEN cDNA 1700022I11 gene
A_52_P245806	2.8248675	Tsix	22097	X (inactive)-specific transcript, opposite strand
A_51_P477716	2.993987	Cadm4	260299	cell adhesion molecule 4
A_52_P826995	2.5619216	BB431852	554158	expressed sequence BB431852
A_51_P356642	3.2479506	Krt19	16669	keratin 19
A_51_P251308	2.0829642	Fbxw2	30050	F-box and WD-40 domain protein 2
A_51_P376105	2.034857
A_51_P137778	2.7425997	5730507C01Rik	236366	RIKEN cDNA 5730507C01 gene
A_51_P209358	2.1223638
A_52_P466124	2.878064	A330041J22Rik	319556	RIKEN cDNA A330041J22 gene
A_51_P492366	2.1673079	Bmp7	12162	bone morphogenetic protein 7
A_52_P150260	2.8834884	Plcz1	114875	phospholipase C, zeta 1
A_52_P476856	2.0457406	Nckap5	210356	NCK-associated protein 5
A_52_P282347	2.107162	Abcc12	244562	ATP-binding cassette, sub-family C (CFTR/MRP), member 12
A_52_P680839	2.140778	Fam69c	240479	family with sequence similarity 69, member C
A_51_P173760	3.3172882	Actb	11461	actin, beta
A_52_P94454	2.2622297	Xndr	102443350	XRCC1 N-terminal domain-related
A_52_P592429	2.2326863	Arl6ip6	65103	ADP-ribosylation factor-like 6 interacting protein 6
(+)E1A_r60_n11	2.864785
A_51_P116755	2.4518769	Cap2	67252	CAP, adenylate cyclase-associated protein, 2 (yeast)
A_51_P303147	2.4257903	H2afb1	68231	H2A histone family, member B1
A_52_P405873	2.221801	Ntm	235106	neurotrimin
A_52_P189410	2.1962166	Atp8a2	50769	ATPase, aminophospholipid transporter-like, class I, type 8A, member 2
A_52_P972871	2.1459193
A_52_P655136	3.0115209	Nlrc4	268973	NLR family, CARD domain containing 4
A_52_P295770	2.661846	BC022713	269739	cDNA sequence BC022713
A_51_P479390	2.0696013	Adamts9	101401	a disintegrin-like and metallopeptidase (reprolysin type) with thrombospondin type 1 motif, 9
A_51_P464981	2.1540914	Map1lc3a	66734	microtubule-associated protein 1 light chain 3 alpha
A_52_P504641	2.7255805	1700052I22Rik	67340	RIKEN cDNA 1700052I22 gene
A_52_P399162	3.9293253	Gm10997	100379607	predicted gene 10997
A_51_P150678	3.5860286	Tnfaip8l2	69769	tumor necrosis factor, alpha-induced protein 8-like 2
A_51_P315154	2.2016795	A330074H02Rik	402758	RIKEN cDNA A330074H02 gene
A_52_P285975	2.2729032	Plekhg1	213783	pleckstrin homology domain containing, family G (with RhoGef domain) member 1
A_51_P125009	4.986371	Pvrl3	58998	poliovirus receptor-related 3
A_52_P407049	2.6738908	Hoxd10	15430	homeobox D10
A_51_P137560	2.3300655	Etv2	14008	ets variant gene 2
A_51_P362343	2.1133091
A_51_P112627	2.4268944	St6galnac2	20446	ST6 (alpha-N-acetyl-neuraminyl-2,3-beta-galactosyl-1,3)-N-acetylgalactosaminide alpha-2,6-sialyltransferase 2
A_52_P508143	5.8348355	Gpr139	209776	G protein-coupled receptor 139
A_52_P96577	2.2199795
A_52_P573627	2.1572378	Arl4c	320982	ADP-ribosylation factor-like 4C
A_51_P208637	2.1042793	Poldip2	67811	polymerase (DNA-directed), delta interacting protein 2
A_52_P151350	2.1442206
A_51_P217191	2.9022348	Gm3234	100041251	predicted gene 3234
A_52_P363216	2.4701874	Gcnt2	14538	glucosaminyl (N-acetyl) transferase 2, I-branching enzyme
A_51_P182462	2.1623876	Lasp1	16796	LIM and SH3 protein 1
A_52_P593175	2.2084773	Rilpl1	75695	Rab interacting lysosomal protein-like 1
A_51_P354345	2.0531445	Zpbp	53604	zona pellucida binding protein
A_51_P216576	2.3224025	Vmn2r10	22307	vomeronasal 2, receptor 10
A_52_P118323	2.3491466	1700108J01Rik	68245	RIKEN cDNA 1700108J01 gene
A_52_P453721	2.13722	Bcas3os2	78420	Bcas3 opposite strand transcript 2
A_51_P298802	2.641353	Bfsp2	107993	beaded filament structural protein 2, phakinin
A_51_P346634	2.4392436	Armcx4	100503043	armadillo repeat containing, X-linked 4
A_52_P25841	2.163607	LOC101056674	101056674	disks large homolog 5-like
A_52_P5567	2.039402	Fam50b	108161	family with sequence similarity 50, member B
A_52_P499948	2.0133662	1700023L04Rik	76419	RIKEN cDNA 1700023L04 gene
A_52_P309381	10.847183	Cfh	12628	complement component factor h
A_51_P402160	3.0188582	Zfp750	319530	zinc finger protein 750
A_51_P499847	2.127974	Dab1	13131	disabled 1
A_51_P326015	2.3314419	Csrnp1	215418	cysteine-serine-rich nuclear protein 1
A_51_P381297	2.3305762	Pax8	18510	paired box gene 8
A_51_P144090	2.2197986	Slc16a3	80879	solute carrier family 16 (monocarboxylic acid transporters), member 3
A_52_P289965	2.3155923	4930556A20Rik	75277	RIKEN cDNA 4930556A20 gene
A_51_P429633	2.3235033	Izumo3	69314	IZUMO family member 3
A_52_P187227	2.14628	Zfp78	330463	zinc finger protein 78
A_52_P277455	2.1621568	Serpinb3a	20248	serine (or cysteine) peptidase inhibitor, clade B (ovalbumin), member 3A
A_52_P594584	2.4914758	Speer2	224318	spermatogenesis associated glutamate (E)-rich protein 2
A_52_P43150	2.2050827	Baat	12012	bile acid-Coenzyme A: amino acid N-acyltransferase
ETG09_35454	2.1585736
A_51_P450952	2.0053666	Leprel4	66180	leprecan-like 4
A_52_P318426	3.2919765	Gm16938	330599	predicted gene, 16938
A_51_P452854	2.517895	Add2	11519	adducin 2 (beta)
A_52_P150484	2.7297504	Tmem150cos	76003	Tmem150c opposite strand transcript
A_52_P299670	2.6888754	Slc26a7	208890	solute carrier family 26, member 7
A_52_P836141	3.1865962
A_52_P488531	2.1293395	4930524O08Rik	74700	RIKEN cDNA 4930524O08 gene
A_52_P1179483	2.0100923	4930404H11Rik	73815	RIKEN cDNA 4930404H11 gene
A_51_P121607	2.2409525	4930546C10Rik	78931	RIKEN cDNA 4930546C10 gene
A_51_P437707	2.0232	Cldn18	56492	claudin 18
A_52_P149766	2.0349965	Myo1e	71602	myosin IE
A_52_P470560	2.4435785	Dpys	64705	dihydropyrimidinase
A_51_P282211	2.2661	Ltb4r2	57260	leukotriene B4 receptor 2
A_52_P380805	2.1738687	Pdpn	14726	podoplanin
A_52_P244908	2.2747068
A_51_P213443	3.1227415	4921527H02Rik	70929	RIKEN cDNA 4921527H02 gene
A_52_P252034	2.5428905	4930431F12Rik	75783	RIKEN cDNA 4930431F12 gene
A_51_P489289	2.7351635	Rhoh	74734	ras homolog gene family, member H
A_51_P470630	2.5856433	2310014L17Rik	381845	RIKEN cDNA 2310014L17 gene
A_51_P393174	2.2889597
A_52_P46716	2.0916536	D030028M11Rik	319910	RIKEN cDNA D030028M11 gene
A_51_P213205	4.2775044	Fam131a	78408	family with sequence similarity 131, member A
A_51_P391367	2.1697416	Tfap4	83383	transcription factor AP4
A_52_P121093	2.2719095	4932416J16Rik	67541	RIKEN cDNA 4932416J16 gene
A_51_P499871	2.2178135	S1pr2	14739	sphingosine-1-phosphate receptor 2
A_52_P395774	2.397184
A_51_P184340	2.056013	Scn3b	235281	sodium channel, voltage-gated, type III, beta
A_52_P449084	2.156628	Fmr1nb	207854	fragile X mental retardation 1 neighbor
A_52_P550948	2.0860763
A_51_P475911	2.310003
A_52_P620496	2.110616	Gpr182	11536	G protein-coupled receptor 182
A_51_P423963	3.8882904	Tas1r3	83771	taste receptor, type 1, member 3
A_52_P359662	2.284228	4930447J18Rik	73961	RIKEN cDNA 4930447J18 gene
A_51_P435363	2.4490967	Lipe	16890	lipase, hormone sensitive
A_52_P224733	2.3071585	A630031M04Rik	320659	RIKEN cDNA A630031M04 gene
A_52_P151934	3.3366983	Gm355	241634	predicted gene 355
A_52_P229791	2.2846885	Defb37	353320	defensin beta 37
A_52_P357039	5.2040224	Tmem39b	230770	transmembrane protein 39b
A_52_P960620	2.160365	Cdc20b	238896	cell division cycle 20B
A_51_P204131	2.9052901	Ccdc178	70950	coiled coil domain containing 178
A_52_P360724	2.0311303
A_52_P330956	2.6045787	Fkbp6	94244	FK506 binding protein 6
A_51_P235426	2.0518851	Hist1h2be	319179	histone cluster 1, H2be
A_51_P427282	2.2389836	Ctsj	26898	cathepsin J
A_52_P819599	2.2829087
A_52_P209514	2.792784	Cacnb2	12296	calcium channel, voltage-dependent, beta 2 subunit
A_52_P1084099	2.4261255
A_52_P508089	2.7732115	Psap	19156	prosaposin
A_52_P1155870	2.199243	Zfp458	238690	zinc finger protein 458
A_52_P351816	2.0246265	Itgb1	16412	integrin beta 1 (fibronectin receptor beta)
A_52_P374157	3.126387	Kbtbd8	243574	kelch repeat and BTB (POZ) domain containing 8
A_52_P671120	2.141905
A_51_P421559	2.2689817	Bspry	192120	B-box and SPRY domain containing
A_51_P298869	3.4802213	Gm4755	208941	predicted gene 4755
A_51_P236486	3.744356	Dcpp1	13184	demilune cell and parotid protein 1
A_52_P616544	2.1588798	Ptprv	13924	protein tyrosine phosphatase, receptor type, V
A_52_P730733	2.4538982	LOC100504804	100504804	uncharacterized LOC100504804
A_52_P548011	2.7068453	D230021J17Rik	319483	RIKEN cDNA D230021J17 gene
A_52_P274400	2.591669	Bai3	210933	brain-specific angiogenesis inhibitor 3
A_52_P322096	3.435687	Patl2	67578	protein associated with topoisomerase II homolog 2 (yeast)
A_51_P168848	3.0497155
A_52_P795333	2.3029726	Cdh18	320865	cadherin 18
A_51_P342549	2.5651078	Hand1	15110	heart and neural crest derivatives expressed transcript 1
A_52_P538894	2.1143184	Gm17580	100504145	predicted gene, 17580
A_52_P796840	3.7141812	Cfhr2	545366	complement factor H-related 2
A_51_P429743	2.1120114	Ceacam13	69785	carcinoembryonic antigen-related cell adhesion molecule 13
A_52_P242631	2.2247071	Gm8363	666919	non-SMC condensin II complex, subunit H2 pseudogene
A_51_P307632	2.3892448
A_51_P215475	2.0202572	Ptprb	19263	protein tyrosine phosphatase, receptor type, B
A_52_P44584	2.2247972	LOC100044625	100044625	disks large homolog 5-like
A_52_P182919	2.0988066	Steap4	117167	STEAP family member 4
A_52_P661470	2.00263
A_52_P439874	2.320028	Arfgap3	66251	ADP-ribosylation factor GTPase activating protein 3
A_52_P343667	2.4740293	Rbm46os	78212	Rbm46 opposite strand transcript
A_51_P356594	2.264522	Dsc3	13507	desmocollin 3
A_52_P336904	2.192574	Pclo	26875	piccolo (presynaptic cytomatrix protein)
A_52_P355365	2.0673404	Actr3b	242894	ARP3 actin-related protein 3B
A_52_P390114	2.050524	Eif4b	75705	eukaryotic translation initiation factor 4B
A_52_P723501	2.2526293
A_52_P597818	3.965388	AF067063	380878	cDNA sequence AF067063
A_51_P143659	2.6772277	Epo	13856	erythropoietin
A_51_P121335	2.0343404	A930018O16Rik	77817	RIKEN cDNA A930018O16 gene
A_52_P392412	2.7576365	Dgcr8	94223	DiGeorge syndrome critical region gene 8
A_52_P1123325	2.1500947	Trio	223435	triple functional domain (PTPRF interacting)
A_52_P303323	2.2968702
A_51_P399517	2.0611496	Fam187a	66784	family with sequence similarity 187, member A
A_51_P231892	2.4844587	Wisp3	327743	WNT1 inducible signaling pathway protein 3
A_52_P123794	2.2868936	Mtap7d3	320923	MAP7 domain containing 3
A_51_P148602	2.5130103	Cxcr2	12765	chemokine (C-X-C motif) receptor 2
A_52_P613241	2.1716597	Icam1	15894	intercellular adhesion molecule 1
A_52_P1092304	2.1420631	B130024M06Rik	320328	RIKEN cDNA B130024M06 gene
A_51_P275905	3.2767227	Fgl1	234199	fibrinogen-like protein 1
A_51_P162426	2.0845904	Rnf8	58230	ring finger protein 8
A_52_P290799	2.580948	Gpr35	64095	G protein-coupled receptor 35
A_51_P147572	2.3769474	Slc28a3	114304	solute carrier family 28 (sodium-coupled nucleoside transporter), member 3
A_51_P302049	2.2030308	4930516K23Rik	76875	RIKEN cDNA 4930516K23 gene
A_51_P442501	2.6154945	Ano4	320091	anoctamin 4
A_52_P288050	2.3347008	Fbln5	23876	fibulin 5
A_51_P229578	2.2083588	Vmn2r-ps104	100041915	vomeronasal 2, receptor, pseudogene 104
A_51_P111164	2.0519505	Rnd1	223881	Rho family GTPase 1
A_52_P9057	2.1488905	2310069B03Rik	69652	RIKEN cDNA 2310069B03 gene
A_52_P665143	2.1907823	Cep95	320162	centrosomal protein 95
A_52_P842965	2.6141732
A_51_P434689	3.272817	9230116L04Rik	321017	RIKEN cDNA 9230116L04 gene
A_52_P465718	2.330753	Aurkc	20871	aurora kinase C
A_51_P429040	3.0290542	Fam129b	227737	family with sequence similarity 129, member B
A_52_P1028337	2.0631723
A_52_P651998	3.337837	Minpp1	17330	multiple inositol polyphosphate histidine phosphatase 1
A_51_P228682	2.2934136	2310002L09Rik	71886	RIKEN cDNA 2310002L09 gene
A_52_P64459	2.7500486	Prl8a1	73244	prolactin family 8, subfamily a, member 1
A_51_P458800	2.533209
A_52_P47660	2.0880754	Tenm2	23964	teneurin transmembrane protein 2
A_51_P360040	3.070377	Spata17	74717	spermatogenesis associated 17
A_51_P403704	2.4432964	2610100L16Rik	70441	RIKEN cDNA 2610100L16 gene
A_52_P185930	2.0095458	Snx7	76561	sorting nexin 7
A_52_P843318	2.8933132
A_51_P448664	2.3474689	Tbxas1	21391	thromboxane A synthase 1, platelet
A_52_P145914	2.2354856	Slc38a10	72055	solute carrier family 38, member 10
A_51_P285243	2.0104573	Chat	12647	choline acetyltransferase
A_52_P1011921	2.091049
A_51_P258894	2.1429095	Chst2	54371	carbohydrate sulfotransferase 2
A_52_P265366	2.4779747
A_51_P416080	2.2063375	Stxbp6	217517	syntaxin binding protein 6 (amisyn)
A_51_P176086	2.2902107	Ffar2	233079	free fatty acid receptor 2
A_52_P295475	2.0503433	Slc22a8	19879	solute carrier family 22 (organic anion transporter), member 8
A_51_P116946	2.6335106	Atp6v0a4	140494	ATPase, H+ transporting, lysosomal V0 subunit A4
A_52_P90337	2.2650158	Mgat1	17308	mannoside acetylglucosaminyltransferase 1
A_52_P1132727	2.091484
A_51_P182538	3.428742	Cd209c	170776	CD209c antigen
A_52_P876226	2.5114741
A_51_P312348	6.8762655	Krt7	110310	keratin 7
A_52_P478236	2.8055558	Wrn	22427	Werner syndrome homolog (human)
A_51_P494297	2.104528	Atp8b1	54670	ATPase, class I, type 8B, member 1
A_52_P395492	2.6525335	Cym	229697	chymosin
A_52_P619215	2.3932235	Ubqlnl	244179	ubiquilin-like
A_52_P408230	7.2437854	Kcnh7	170738	potassium voltage-gated channel, subfamily H (eag-related), member 7
A_51_P413587	2.947541	9430065F17Rik	77857	RIKEN cDNA 9430065F17 gene
A_52_P61676	2.1097097	Vps37c	107305	vacuolar protein sorting 37C (yeast)
A_51_P419365	2.3955877	Serpina1f	68348	serine (or cysteine) peptidase inhibitor, clade A, member 1F
A_51_P343266	2.197558	Olfr473	258771	olfactory receptor 473
A_51_P364168	3.8849428	Lrp5	16973	low density lipoprotein receptor-related protein 5
A_52_P332527	2.1919608	Adamts3	330119	a disintegrin-like and metallopeptidase (reprolysin type) with thrombospondin type 1 motif, 3
A_52_P376971	4.282624
A_52_P160896	2.444892	Kynu	70789	kynureninase (L-kynurenine hydrolase)
A_52_P1132312	4.2658973
A_51_P517388	2.3900452	Plbd1	66857	phospholipase B domain containing 1
A_51_P265187	2.0684333
A_51_P505617	2.0707195	Il18r1	16182	interleukin 18 receptor 1
A_51_P258529	4.152981	Pmp22	18858	peripheral myelin protein 22
A_52_P441036	2.5134583	Col23a1	237759	collagen, type XXIII, alpha 1
A_51_P242493	2.2581668	Ankrd60	70065	ankyrin repeat domain 60
A_51_P216179	2.006155	Erbb2	13866	v-erb-b2 erythroblastic leukemia viral oncogene homolog 2, neuro/glioblastoma derived oncogene homolog (avian)
A_51_P419562	3.0228286	4931400O07Rik	70936	RIKEN cDNA 4931400O07 gene
A_51_P273790	2.1327777	Pbsn	54192	probasin
A_52_P22324	2.1015828	Pln	18821	phospholamban
A_51_P278334	7.567461	Vldlr	22359	very low density lipoprotein receptor
A_52_P499027	2.0160387	Eif4e2	26987	eukaryotic translation initiation factor 4E member 2
A_51_P520718	3.9340322	Ptger3	19218	prostaglandin E receptor 3 (subtype EP3)
A_52_P947996	2.7530773
A_52_P383033	2.24622	D830044D21Rik	320621	RIKEN cDNA D830044D21 gene
A_52_P596541	2.5770853	Kdelr1	68137	KDEL (Lys-Asp-Glu-Leu) endoplasmic reticulum protein retention receptor 1
A_52_P208521	2.0621827	Khdc1a	368204	KH domain containing 1A
A_51_P140207	2.256511	1700029H14Rik	66501	RIKEN cDNA 1700029H14 gene
A_51_P213223	3.0679574	Galnt18	233733	UDP-N-acetyl-alpha-D-galactosamine:polypeptide N-acetylgalactosaminyltransferase 18
A_51_P371355	2.0683231	Nlrp14	76858	NLR family, pyrin domain containing 14
A_51_P468887	2.6958418
A_51_P117457	3.5968645	Dcaf12l2	245403	DDB1 and CUL4 associated factor 12-like 2
A_51_P487918	2.0345392	Rinl	320435	Ras and Rab interactor-like
A_51_P136820	3.356853	Psap	19156	prosaposin
A_52_P661	2.6363077	Plxna4	243743	plexin A4
A_51_P145453	2.0038397	Xist	213742	inactive X specific transcripts
A_51_P353221	2.7605155	Thbs4	21828	thrombospondin 4
A_51_P307082	2.1175706	Hey2	15214	hairy/enhancer-of-split related with YRPW motif 2
A_52_P556049	2.075277	Uspl1	231915	ubiquitin specific peptidase like 1
A_51_P260683	2.1789682	Rgs1	50778	regulator of G-protein signaling 1
A_51_P345449	2.9299061	Olfr39	258822	olfactory receptor 39
A_51_P148093	2.176544	Ptprm	19274	protein tyrosine phosphatase, receptor type, M
A_52_P551318	2.8126872
A_52_P1140423	2.588683	Gm4926	237749	T-cell immunoglobulin and mucin domain containing 2 pseudogene
A_52_P52803	2.4040878	Hspa1b	15511	heat shock protein 1B
A_51_P143135	2.0631063	Bricd5	319259	BRICHOS domain containing 5
A_52_P260105	2.523682	Man1a	17155	mannosidase 1, alpha
A_52_P106259	2.4112911	Egfr	13649	epidermal growth factor receptor
A_52_P74883	2.156659	Myo16	244281	myosin XVI
A_51_P267780	2.6443906	Spata4	69281	spermatogenesis associated 4
A_51_P459215	2.7810984	C78859	97455	expressed sequence C78859
A_51_P443902	4.955172	Klk1b16	16615	kallikrein 1-related peptidase b16
A_51_P287436	2.0166006	Cd209g	70192	CD209g antigen
A_51_P106918	2.7068036	Rex2	100043034	reduced expression 2
A_52_P367983	2.8770123	Zfp385b	241494	zinc finger protein 385B
A_51_P249024	2.2964885	Hk1	15275	hexokinase 1
A_51_P518864	2.1539342	4932411E22Rik	214604	RIKEN cDNA 4932411E22 gene
A_52_P1020510	2.102036
A_52_P255864	2.7053275	Abca3	27410	ATP-binding cassette, sub-family A (ABC1), member 3
A_52_P13703	2.2881248	Tmem242	70544	transmembrane protein 242
A_52_P743305	2.049154	Pabpn1	54196	poly(A) binding protein, nuclear 1
A_51_P110651	2.0033755	Zfp13	22654	zinc finger protein 13
A_51_P355652	2.4337823	Olfr1448	258696	olfactory receptor 1448
A_51_P412318	2.3253286
A_52_P583097	2.2337499	C2cd4a	244911	C2 calcium-dependent domain containing 4A
A_52_P266587	2.194683
A_52_P470104	2.3988364
A_51_P307858	2.6191823	1700019N19Rik	67507	RIKEN cDNA 1700019N19 gene
A_51_P139437	3.1363811
A_52_P1099405	2.4003565	4930509J09Rik	74693	RIKEN cDNA 4930509J09 gene
A_51_P268535	4.327576	Ear10	93725	eosinophil-associated, ribonuclease A family, member 10
A_52_P667287	2.44519	Cers6	241447	ceramide synthase 6
A_52_P113651	2.236958	Ptpn13	19249	protein tyrosine phosphatase, non-receptor type 13
A_51_P170360	2.8907661	4921511E18Rik	70879	RIKEN cDNA 4921511E18 gene
A_52_P685963	2.2359776	Tnr	21960	tenascin R
A_51_P402994	2.650797	Ddx3y	26900	DEAD (Asp-Glu-Ala-Asp) box polypeptide 3, Y-linked
A_52_P130952	2.0590262	Nr1d1	217166	nuclear receptor subfamily 1, group D, member 1
A_52_P520607	2.0502956	Ankrd22	52024	ankyrin repeat domain 22
A_52_P378433	2.5114782	Slc9b1	74446	solute carrier family 9, subfamily B (NHA1, cation proton antiporter 1), member 1
A_51_P517001	2.1739411	D130040H23Rik	211135	RIKEN cDNA D130040H23 gene
A_51_P430728	2.8433905	Hoxd9	15438	homeobox D9
A_52_P282279	2.03195	Mthfd1	108156	methylenetetrahydrofolate dehydrogenase (NADP+ dependent)
A_52_P1140283	2.1351058
A_52_P1180378	3.355508
A_51_P200529	2.4987879	Mpst	246221	mercaptopyruvate sulfurtransferase
A_52_P447567	2.0497828	5330417C22Rik	229722	RIKEN cDNA 5330417C22 gene
A_51_P429152	2.3296957	Cxxc4	319478	CXXC finger 4
A_52_P496726	2.0266852	Rasd1	19416	RAS, dexamethasone-induced 1
A_51_P313925	2.1787755	Trhr	22045	thyrotropin releasing hormone receptor
A_52_P104606	3.0808861	Tmem52b	330428	transmembrane protein 52B
A_52_P89049	3.29342	Dlg2	23859	discs, large homolog 2 (Drosophila)
A_51_P153029	3.3352945	Ankrd53	75305	ankyrin repeat domain 53
A_51_P516833	2.5505567	Igf2	16002	insulin-like growth factor 2
A_52_P1044655	2.4223752	Vcan	13003	versican
A_52_P209383	2.524272	Tgfb1i1	21804	transforming growth factor beta 1 induced transcript 1
A_52_P707512	2.1260924
A_52_P605001	2.1239116
A_52_P312234	2.0487657
A_52_P96558	2.68297	6330408A02Rik	321008	RIKEN cDNA 6330408A02 gene
A_52_P844857	2.1015663
A_52_P648824	2.7273862
A_52_P652336	3.343189	Lhx1	16869	LIM homeobox protein 1
A_52_P127892	2.4060051
A_51_P151564	2.862091	A730036I17Rik	329513	RIKEN cDNA A730036I17 gene
A_52_P671676	3.2986104	Rasgrf1	19417	RAS protein-specific guanine nucleotide-releasing factor 1
A_52_P167357	2.9698114	Rab40b	217371	Rab40b, member RAS oncogene family
A_52_P672212	2.160513	Calr	12317	calreticulin
A_52_P160442	2.4969094	Fam178b	381337	family with sequence similarity 178, member B
A_52_P61864	2.4788203	Wnt2	22413	wingless-related MMTV integration site 2
A_52_P259994	2.3077552
A_52_P658611	3.944949	Col1a1	12842	collagen, type I, alpha 1
A_52_P282500	15.515396	Kif21b	16565	kinesin family member 21B
A_51_P290886	2.2978926	Cdh8	12564	cadherin 8
A_52_P827761	4.0549192	4932442G11Rik	320984	RIKEN cDNA 4932442G11 gene
A_51_P162124	2.4564118	Smim18	72632	small integral membrane protein 18
A_52_P259779	2.5732489
A_52_P755022	3.1616907
A_51_P358953	2.0141075	Zfx	22764	zinc finger protein X-linked
A_51_P385220	2.221873	1700094I16Rik	73548	RIKEN cDNA 1700094I16 gene
A_52_P679818	4.1454673	4833423E24Rik	228151	RIKEN cDNA 4833423E24 gene
A_52_P360241	2.1271665	Prickle2	243548	prickle homolog 2 (Drosophila)
A_52_P1052352	2.2787766
A_52_P164524	9.06634	Pcsk1	18548	proprotein convertase subtilisin/kexin type 1
A_52_P176160	2.0048492	Ahcy	269378	S-adenosylhomocysteine hydrolase
A_52_P162500	2.3709023	Dph3	105638	diphthamine biosynthesis 3
A_51_P510518	2.629002	Fabp9	21884	fatty acid binding protein 9, testis
A_51_P442592	2.6993392	9330153N18Rik	77509	RIKEN cDNA 9330153N18 gene
A_52_P550932	2.1574888	H1f0	14958	H1 histone family, member 0
A_51_P319022	3.2276082	Cxcr3	12766	chemokine (C-X-C motif) receptor 3
A_51_P381611	2.1134086	Morc4	75746	microrchidia 4
A_52_P571868	4.131582	Zbtb1	268564	zinc finger and BTB domain containing 1
A_51_P179672	2.7796547	Hbb-bh1	15132	hemoglobin Z, beta-like embryonic chain
A_51_P183253	2.3058922	Tssk3	58864	testis-specific serine kinase 3
A_52_P439545	2.2037547	4930447F04Rik	74862	RIKEN cDNA 4930447F04 gene
A_52_P204618	3.6899045	Rnf222	320040	ring finger protein 222
A_52_P634213	2.1826878	Eif2d	16865	eukaryotic translation initiation factor 2D
A_51_P175567	2.014883	Dact1	59036	dapper homolog 1, antagonist of beta-catenin (xenopus)
A_52_P13365	2.1027708	Stk10	20868	serine/threonine kinase 10
A_52_P453344	6.9485006
A_51_P230599	3.085461	Serpinb3a	20248	serine (or cysteine) peptidase inhibitor, clade B (ovalbumin), member 3A
A_51_P273778	2.6007767	Agbl3	76223	ATP/GTP binding protein-like 3
A_51_P101729	3.7097223	Cfh	12628	complement component factor h
A_51_P188782	3.4107728	Ube2s	77891	ubiquitin-conjugating enzyme E2S
A_51_P487404	4.448536	Mybpc1	109272	myosin binding protein C, slow-type
A_51_P367866	2.0181732	Egr1	13653	early growth response 1
A_52_P858943	2.8953454	Pkd2	18764	polycystic kidney disease 2
A_51_P348292	4.2732043	AI843588	107252	expressed sequence AI843588
A_52_P518922	2.0063927	Itga1	109700	integrin alpha 1
A_51_P283997	2.0808544
A_52_P1195662	2.8390987
A_51_P520191	2.4581645	Gpr35	64095	G protein-coupled receptor 35
A_52_P224723	3.205972
A_51_P358683	2.3096607	Gpr183	321019	G protein-coupled receptor 183
A_52_P61833	6.78373
A_51_P442227	2.6867807	Slc12a1	20495	solute carrier family 12, member 1
A_51_P172897	2.8447723	Foxj3	230700	forkhead box J3
A_52_P378736	2.5045002	Col12a1	12816	collagen, type XII, alpha 1
A_51_P196207	2.4146059	Capsl	75568	calcyphosine-like
A_52_P260659	3.9201782	Kcnj10	16513	potassium inwardly-rectifying channel, subfamily J, member 10
A_52_P363843	2.4500499	Zscan4c	245109	zinc finger and SCAN domain containing 4C
A_52_P1021744	10.704935
A_52_P565976	2.2200837	Ccdc169	320604	coiled-coil domain containing 169
A_52_P836024	2.4607122
A_52_P102755	2.5289924
A_51_P107099	2.083761
A_52_P47121	3.052102
A_51_P229244	2.03745	Ranbp6	240614	RAN binding protein 6
A_51_P128299	3.2383919
A_52_P304902	4.407476	Hspa1b	15511	heat shock protein 1B
A_52_P572765	2.4746273
A_51_P352940	2.3441124	Trhr2	170732	thyrotropin releasing hormone receptor 2
A_51_P286792	3.3803546	Zfp275	27081	zinc finger protein 275
A_51_P297434	2.1519613	Sox11	20666	SRY-box containing gene 11
A_51_P356942	2.0901442	Trim55	381485	tripartite motif-containing 55
A_51_P412348	2.2947357	Scnn1b	20277	sodium channel, nonvoltage-gated 1 beta
A_52_P834840	3.8061256	5830435N06Rik	76033	RIKEN cDNA 5830435N06 gene
A_52_P668652	2.1608434
A_52_P37135	2.3334937	BC049730	232972	cDNA sequence BC049730
A_51_P133468	3.1145809	A230107O07Rik	319851	RIKEN cDNA A230107O07 gene
A_52_P420357	2.666281	Slc15a1	56643	solute carrier family 15 (oligopeptide transporter), member 1
A_52_P596375	2.149506	Cckbr	12426	cholecystokinin B receptor
A_52_P836152	2.166825
A_51_P219896	2.1027706	Ttc28	209683	tetratricopeptide repeat domain 28
A_52_P79003	3.0296714	LOC100048185	100048185	transcription factor BTF3-like
A_51_P202760	2.873517	1700128F08Rik	76669	U1-snRNP binding protein homolog pseudogene
A_52_P341058	2.0713603	D930020B18Rik	216393	RIKEN cDNA D930020B18 gene
A_51_P193993	2.0293567	Clic5	224796	chloride intracellular channel 5
A_52_P94021	4.65741	Spam1	20690	sperm adhesion molecule 1
A_52_P411430	2.4280696	Gm5914	546100	predicted gene 5914
A_51_P349087	2.3159995	Sall4	99377	sal-like 4 (Drosophila)
A_52_P787779	2.500033	Gm2861	100040598	predicted gene 2861
A_51_P501209	4.3089204
A_51_P171676	3.1264393
A_52_P393567	2.1637924	H2-M10.4	224753	histocompatibility 2, M region locus 10.4
A_52_P387069	2.9383855	Trpm3	226025	transient receptor potential cation channel, subfamily M, member 3
A_51_P261517	2.5909002	Tyrobp	22177	TYRO protein tyrosine kinase binding protein
A_52_P947534	2.0467918	C77370	245555	expressed sequence C77370
A_51_P425047	2.3561342	Srpx2	68792	sushi-repeat-containing protein, X-linked 2
A_52_P163750	2.0361922	3830417A13Rik	70696	RIKEN cDNA 3830417A13 gene
A_51_P307017	3.1227217	Ano3	228432	anoctamin 3
A_52_P304031	2.5055885	Ppp2r2b	72930	protein phosphatase 2 (formerly 2A), regulatory subunit B (PR 52), beta isoform
A_52_P443538	2.177132
A_52_P380314	2.551101	Cyp3a25	56388	cytochrome P450, family 3, subfamily a, polypeptide 25
A_52_P456192	2.1498415	Sh3d21	66938	SH3 domain containing 21
A_52_P396271	2.8071997	Reps2	194590	RALBP1 associated Eps domain containing protein 2
A_51_P122614	2.5258253	Heatr1	217995	HEAT repeat containing 1
A_52_P891648	5.482187
A_52_P457312	5.383108	Fat3	270120	FAT tumor suppressor homolog 3 (Drosophila)
A_52_P534269	2.03605	Tnik	665113	TRAF2 and NCK interacting kinase
A_51_P252103	2.0382366	Sla2	77799	Src-like-adaptor 2
A_51_P280906	3.0560367	Jag1	16449	jagged 1
A_51_P335888	2.3949614	9430087N24Rik	77440	RIKEN cDNA 9430087N24 gene
A_51_P480679	2.0548227	D430036J16Rik	319405	RIKEN cDNA D430036J16 gene
A_51_P258972	2.5033982	Ccer1	66716	coiled coil glutamate rich protein 1
A_51_P180761	2.515554	Mybl1	17864	myeloblastosis oncogene-like 1
A_52_P603872	3.8009608	4930478P22Rik	74429	RIKEN cDNA 4930478P22 gene
A_51_P377833	2.7429214	Cmtm7	102545	CKLF-like MARVEL transmembrane domain containing 7
A_51_P267986	2.7667081	Enox2	209224	ecto-NOX disulfide-thiol exchanger 2
A_52_P209930	2.6064403	Arpp21	74100	cyclic AMP-regulated phosphoprotein, 21
A_52_P149845	3.456443
A_52_P240632	2.1748948	Olfr633	258351	olfactory receptor 633
A_52_P130961	2.0058296	Nr1d1	217166	nuclear receptor subfamily 1, group D, member 1
A_51_P379798	2.1197774	Fdps	110196	farnesyl diphosphate synthetase
A_51_P133684	5.099716	Csrp3	13009	cysteine and glycine-rich protein 3
A_51_P169445	3.2871656	Ccdc89	70054	coiled-coil domain containing 89
A_51_P248441	2.273918	Ube2g2	22213	ubiquitin-conjugating enzyme E2G 2
A_51_P151179	2.5435874	Ccdc30	73332	coiled-coil domain containing 30
A_51_P433489	3.7188175
A_52_P779260	2.0832417
A_52_P115191	3.1338017
A_51_P224362	2.5858426	Akap6	238161	A kinase (PRKA) anchor protein 6
A_52_P421344	2.1973977	Paqr5	74090	progestin and adipoQ receptor family member V
A_52_P151111	2.048737
A_51_P472955	5.528067	Btbd16	330660	BTB (POZ) domain containing 16
A_51_P221510	2.9295015	Fam81a	76886	family with sequence similarity 81, member A
A_51_P461067	2.3731322
A_52_P598379	2.4148796	5730422E09Rik	433966	RIKEN cDNA 5730422E09 gene
A_51_P290153	2.3984768	Olfr1205	258898	olfactory receptor 1205
A_51_P264884	2.2011201	Snx8	231834	sorting nexin 8
A_51_P426708	2.1666493	Olfr365	258656	olfactory receptor 365
A_52_P517668	3.2260916	Gm6166	101056162	fatty acid-binding protein, epidermal-like
A_52_P818900	3.3727715
A_52_P1164839	2.367349	Onecut2	225631	one cut domain, family member 2
A_52_P369123	2.0398662	Fam189a2	381217	family with sequence similarity 189, member A2
A_52_P462867	2.241826
A_52_P679935	2.297367	Fmo6	226565	flavin containing monooxygenase 6
A_51_P413991	2.1418493	Frs2	327826	fibroblast growth factor receptor substrate 2
A_52_P352574	10.4746
A_52_P559975	2.1733787	Cxcr2	12765	chemokine (C-X-C motif) receptor 2
A_51_P442193	2.7142866	D230019N24Rik	399607	RIKEN cDNA D230019N24 gene
A_52_P526379	2.8925974	Stx3	20908	syntaxin 3
A_51_P300817	2.6437888	Atp1a1	11928	ATPase, Na+/K+ transporting, alpha 1 polypeptide
A_51_P238796	2.9053693	Ctsll3	70202	cathepsin L-like 3
A_52_P82741	2.5008793	Hspa1a	193740	heat shock protein 1A
A_51_P233622	2.3254316	1700006E09Rik	75437	RIKEN cDNA 1700006E09 gene
A_51_P437628	2.8408875	Uncx	22255	UNC homeobox
A_52_P425839	3.083674	Retnlg	245195	resistin like gamma
A_52_P505413	3.3462296	Ripk4	72388	receptor-interacting serine-threonine kinase 4
A_51_P486479	3.3699853	Rab5c	19345	RAB5C, member RAS oncogene family
A_51_P113784	3.803265	Prpf19	28000	PRP19/PSO4 pre-mRNA processing factor 19 homolog (S. cerevisiae)
A_51_P459012	2.3477726	Zswim2	71861	zinc finger SWIM-type containing 2
A_51_P304109	2.1984932	Cyp2c39	13098	cytochrome P450, family 2, subfamily c, polypeptide 39
A_52_P445346	3.5376618	Dapk1	69635	death associated protein kinase 1
A_51_P422388	2.2888062	Foxn4	116810	forkhead box N4
A_52_P884048	2.5356026
A_52_P404533	6.387112	Hspb1	15507	heat shock protein 1
A_52_P536407	2.3347013	Muc3	666339	mucin 3, intestinal
A_51_P174723	3.5082529	Cd86	12524	CD86 antigen
A_52_P574869	2.6131241
A_51_P129127	2.1815016	H2-T3	15043	histocompatibility 2, T region locus 3
A_52_P980244	2.0531223
A_52_P939420	2.6328137
A_51_P326229	2.8997734	Ddx25	30959	DEAD (Asp-Glu-Ala-Asp) box polypeptide 25
A_52_P283814	2.4399657	A930025A13Rik	320580	RIKEN cDNA A930025A13 gene
A_52_P226489	2.1894615
A_51_P294954	2.6946907
A_52_P109548	2.3199036	Map7	17761	microtubule-associated protein 7
A_51_P466270	2.2934115	Heph	15203	hephaestin
A_52_P325706	2.4707062	Il12rb2	16162	interleukin 12 receptor, beta 2
A_52_P168505	2.9511828	Zdhhc21	68268	zinc finger, DHHC domain containing 21
A_51_P444934	3.9027796	Syk	20963	spleen tyrosine kinase
A_51_P372372	2.8365247	Olfr420	258302	olfactory receptor 420
A_51_P480169	2.1075506	S1pr5	94226	sphingosine-1-phosphate receptor 5
A_51_P138596	3.3379784
A_52_P272198	2.8421159
A_51_P511727	2.0878804
A_52_P151084	2.3686152	Akap10	56697	A kinase (PRKA) anchor protein 10
A_52_P86424	2.4549572	Eya4	14051	eyes absent 4 homolog (Drosophila)
A_51_P492037	2.6056082	Fam71e2	243822	family with sequence similarity 71, member E2
A_51_P324860	2.313011	Kirrel	170643	kin of IRRE like (Drosophila)
A_52_P1164632	2.1486068
A_52_P1179800	2.0601096
A_52_P463235	3.305674	Ankrd33b	67434	ankyrin repeat domain 33B
A_52_P411294	2.4106376
A_52_P22001	2.8894231	Thsd1	56229	thrombospondin, type I, domain 1
A_51_P216029	2.7706645	C030039E19Rik	77640	RIKEN cDNA C030039E19 gene
A_52_P280630	4.3178115
A_51_P504194	2.537093	Il1f6	54448	interleukin 1 family, member 6
A_52_P618173	3.657008	Limch1	77569	LIM and calponin homology domains 1
A_52_P947394	2.4527667
A_51_P107673	2.1146345	Myh13	544791	myosin, heavy polypeptide 13, skeletal muscle
A_52_P318361	2.203564	Ces2c	234671	carboxylesterase 2C
A_51_P263234	2.7581987
A_51_P463282	2.4403038	Scube3	268935	signal peptide, CUB domain, EGF-like 3
A_52_P481320	2.19967
A_52_P180917	2.2968066	Kcnq2	16536	potassium voltage-gated channel, subfamily Q, member 2
A_52_P9489	2.3100278
A_52_P1132657	2.548112	B930078G14Rik	791373	RIKEN cDNA B930078G14 gene
A_51_P229655	2.0395885	Acsm5	272428	acyl-CoA synthetase medium-chain family member 5
A_52_P503071	2.2883766	Aldh7a1	110695	aldehyde dehydrogenase family 7, member A1
A_52_P410685	5.4963064	Krt7	110310	keratin 7
A_51_P182794	2.0452309	Tgm2	21817	transglutaminase 2, C polypeptide
A_51_P514945	2.169275	4933402J10Rik	71057	RIKEN cDNA 4933402J10 gene
A_52_P124582	2.325796
A_52_P110741	2.276516	Pcdhb5	93876	protocadherin beta 5
A_52_P624609	2.213699	H2-M10.6	399549	histocompatibility 2, M region locus 10.6
A_51_P386280	2.584157	Olfr187	258319	olfactory receptor 187
A_52_P39314	2.161386	Speer7-ps1	75858	spermatogenesis associated glutamate (E)-rich protein 7, pseudogene 1
A_51_P514267	2.6753469	Atp6v1g3	338375	ATPase, H+ transporting, lysosomal V1 subunit G3
A_51_P113195	4.452292	Upk1b	22268	uroplakin 1B
A_52_P480842	2.4203289	Prrx1	18933	paired related homeobox 1
A_52_P876286	2.2667015
A_51_P275976	3.8123896	Dok1	13448	docking protein 1
A_52_P1051649	2.5626233
A_51_P113335	2.486708
A_52_P654946	2.1327288
A_52_P528456	2.0163023	Fam107b	66540	family with sequence similarity 107, member B
A_51_P375926	2.0200846	Gigyf1	57330	GRB10 interacting GYF protein 1
A_52_P587462	3.0121012
A_51_P202244	2.3849912	Ydjc	69101	YdjC homolog (bacterial)
A_51_P164927	3.7469263	Aim2	383619	absent in melanoma 2
A_52_P1052870	2.0145385	1810019N24Rik	69086	RIKEN cDNA 1810019N24 gene
A_52_P584109	2.027437	Kat5	81601	K(lysine) acetyltransferase 5
A_51_P465858	2.378043
A_51_P166886	2.4343796	Saa2	20209	serum amyloid A 2
A_51_P475938	3.1416276	Mfsd6l	215723	major facilitator superfamily domain containing 6-like
A_52_P364645	2.2376006	Gabra3	14396	gamma-aminobutyric acid (GABA) A receptor, subunit alpha 3
A_52_P512137	2.337044	Iqub	214704	IQ motif and ubiquitin domain containing
A_52_P357309	2.170459	Madd	228355	MAP-kinase activating death domain
A_52_P500040	2.207952
A_52_P13326	2.0030563	Barhl2	104382	BarH-like 2 (Drosophila)
A_52_P367745	2.5094373	Acads	11409	acyl-Coenzyme A dehydrogenase, short chain
A_52_P67666	2.4024463	Asic5	58170	acid-sensing (proton-gated) ion channel family member 5
A_52_P747578	2.173799
A_51_P333923	9.739462	Tspan1	66805	tetraspanin 1
A_52_P566990	2.0795138
A_51_P175601	2.040941	4930578C19Rik	75905	RIKEN cDNA 4930578C19 gene
A_51_P175090	2.495927
A_52_P568200	5.419567
A_51_P276777	2.17826	Nlrp4e	446099	NLR family, pyrin domain containing 4E
A_51_P471058	2.1764162	Mrc2	17534	mannose receptor, C type 2
A_52_P56447	2.3423097	Tmem30c	71027	transmembrane protein 30C
A_52_P25089	3.8825302	Sox6	20679	SRY-box containing gene 6
A_52_P559779	2.144243	Dsg2	13511	desmoglein 2
A_51_P499960	2.0422776	Olfr1157	258846	olfactory receptor 1157
A_52_P412585	2.7047176	Ear1	13586	eosinophil-associated, ribonuclease A family, member 1
A_52_P1188177	2.0781412
A_52_P269482	2.1406946	Prss47	218304	protease, serine, 47
DCP_22_9	2.146856
A_51_P373424	2.0487957	Kcnf1	382571	potassium voltage-gated channel, subfamily F, member 1
A_52_P429609	2.9614806	Slamf7	75345	SLAM family member 7
A_52_P657657	2.0377004	Mctp1	78771	multiple C2 domains, transmembrane 1
A_51_P478338	3.6929977	Drd3	13490	dopamine receptor D3
A_51_P390857	2.2451475
DCP_20_5	4.6583595
A_51_P416374	3.177452	Gje1	76743	gap junction protein, epsilon 1
A_52_P340283	2.0633824
A_52_P930186	2.2379494	2900072G19Rik	73017	RIKEN cDNA 2900072G19 gene
A_51_P380719	2.3760273
A_52_P255577	2.062454	Il18rap	16174	interleukin 18 receptor accessory protein
A_51_P399305	2.0514133	Tnfrsf19	29820	tumor necrosis factor receptor superfamily, member 19
A_52_P209578	2.7730978	A030001D20Rik	100126243	RIKEN cDNA A030001D20 gene
A_51_P144957	2.2071872	Tram1l1	229801	translocation associated membrane protein 1-like 1
A_51_P444954	2.2993016	Serpina5	268591	serine (or cysteine) peptidase inhibitor, clade A, member 5
A_52_P270501	3.4300883	Scgb2b27	233099	secretoglobin, family 2B, member 27
A_52_P261496	2.4530134	Gabpb1	14391	GA repeat binding protein, beta 1
A_51_P230298	2.24826	Hdgfl1	15192	hepatoma derived growth factor-like 1
A_51_P478581	3.1161327	1700030F18Rik	72277	RIKEN cDNA 1700030F18 gene
A_51_P135296	2.8620868	Mroh2b	223825	maestro heat-like repeat family member 2B
A_51_P257333	2.0764976
A_52_P653299	2.277675
A_51_P476668	2.1770902
A_51_P436839	7.4447236	Lsr	54135	lipolysis stimulated lipoprotein receptor
A_52_P402531	2.554598	4930556L07Rik	75283	RIKEN cDNA 4930556L07 gene
DCP_22_0	4.5910068
A_52_P1180904	2.4244328
A_52_P99517	2.2477393	LOC101056604	101056604	uncharacterized LOC101056604
DCP_22_4	4.869731
A_51_P118545	2.8478494	S100g	12309	S100 calcium binding protein G
A_52_P56751	3.0449128	Lcp1	18826	lymphocyte cytosolic protein 1
A_52_P134796	2.456945	9530051G07Rik	319781	RIKEN cDNA 9530051G07 gene
A_52_P755707	2.5924547
A_51_P137018	2.061557	4930438A08Rik	73988	RIKEN cDNA 4930438A08 gene
DCP_20_3	4.5032578
A_52_P87513	2.147664
A_52_P318631	2.4656706	Eef2	13629	eukaryotic translation elongation factor 2
A_52_P15495	3.377971	Pvrl3	58998	poliovirus receptor-related 3
A_52_P164578	2.0446212	Cdh2	12558	cadherin 2
A_52_P498167	3.1026287	D10Jhu81e	28295	DNA segment, Chr 10, Johns Hopkins University 81 expressed
A_52_P1142105	2.122733
A_52_P258645	2.2796922
A_52_P76184	3.0075607	Pvt1	19296	plasmacytoma variant translocation 1
A_51_P257832	2.0067036	Uros	22276	uroporphyrinogen III synthase
A_52_P266975	2.6090722
A_52_P327073	2.4049225	Park2	50873	Parkinson disease (autosomal recessive, juvenile) 2, parkin
A_51_P109298	2.0013287	Olfr201	258996	olfactory receptor 201
A_51_P245038	4.009759	1700011A15Rik	66322	RIKEN cDNA 1700011A15 gene
A_52_P827279	2.080242
A_52_P17788	2.0383596	Trim13	66597	tripartite motif-containing 13
A_52_P8270	3.8466175	4933432K03Rik	75793	RIKEN cDNA 4933432K03 gene
A_52_P23987	2.2312217	Set	56086	SET nuclear oncogene
A_52_P411280	3.7847521	Ptprr	19279	protein tyrosine phosphatase, receptor type, R
A_51_P227785	2.0179875	Klhl3	100503085	kelch-like 3
A_52_P1101021	2.6023564
A_51_P195756	2.906837	Lrp4	228357	low density lipoprotein receptor-related protein 4
A_51_P263290	2.4068546	Galnt9	231605	UDP-N-acetyl-alpha-D-galactosamine:polypeptide N-acetylgalactosaminyltransferase 9
A_51_P505846	2.2234218	2010001E11Rik	72045	RIKEN cDNA 2010001E11 gene
A_51_P500044	3.7545629	Vldlr	22359	very low density lipoprotein receptor
A_51_P469510	6.941628	1700074P13Rik	73481	RIKEN cDNA 1700074P13 gene
A_52_P538447	2.703288	Bloc1s5	17828	biogenesis of organelles complex-1, subunit 5, muted
DCP_22_2	4.65973
A_51_P256983	2.0505617	Klrg1	50928	killer cell lectin-like receptor subfamily G, member 1
A_52_P662042	2.1368592	Tcl1b5	27382	T cell leukemia/lymphoma 1B, 5
A_51_P349652	2.0051475	Lao1	100470	L-amino acid oxidase 1
DCP_20_7	3.6094534
A_51_P480119	2.224679	Prelid2	77619	PRELI domain containing 2
A_51_P428316	2.5559103	4930539N22Rik	75203	RIKEN cDNA 4930539N22 gene
A_51_P212509	2.5999377	Akap4	11643	A kinase (PRKA) anchor protein 4
A_51_P182079	2.3913023	Slc24a2	76376	solute carrier family 24 (sodium/potassium/calcium exchanger), member 2
A_51_P149868	2.2718093	Irx1	16371	Iroquois related homeobox 1 (Drosophila)
A_52_P130663	2.2365108	Vmn1r203	171270	vomeronasal 1 receptor 203
A_51_P207763	2.3985856	Serpinb3b	383548	serine (or cysteine) peptidase inhibitor, clade B (ovalbumin), member 3B
A_52_P467519	2.140577
AT_ssM_TR_5	2.059314
A_51_P471746	2.2004383	Iqcf3	68265	IQ motif containing F3
A_51_P200930	2.5949004	4931417E11Rik	66740	RIKEN cDNA 4931417E11 gene
A_51_P304603	3.0900106
A_52_P259268	2.5438552	Gm7969	666185	predicted gene 7969
A_52_P278336	2.425736	Fbln5	23876	fibulin 5
A_52_P351495	2.1242096	4933406I18Rik	71045	RIKEN cDNA 4933406I18 gene
A_51_P290202	2.3473115	Hoxb13	15408	homeobox B13
A_52_P274437	3.1140506	9430047L24Rik	320850	RIKEN cDNA 9430047L24 gene
A_51_P384314	2.105269
A_52_P851101	2.3958516
A_52_P616018	3.7014556	LOC101055806	101055806	uncharacterized LOC101055806
A_51_P478688	2.0214925	Samd10	229011	sterile alpha motif domain containing 10
A_52_P978481	2.5629537	1700025K24Rik	69418	RIKEN cDNA 1700025K24 gene
A_51_P137433	2.9083555	Kifc1	100502766	kinesin family member C1
A_51_P257712	2.460208	Olfr104-ps	257948	olfactory receptor 104, pseudogene
A_51_P114817	2.0926833	Ccna1	12427	cyclin A1
A_51_P467110	2.2828915	Dpp4	13482	dipeptidylpeptidase 4
DCP_22_6	5.1329017
A_52_P280159	2.1651828	CK137956	635169	cDNA sequence CK137956
A_52_P229471	2.4756706	Vegfa	22339	vascular endothelial growth factor A
A_52_P359704	2.2372952	Rabl3	67657	RAB, member of RAS oncogene family-like 3
A_51_P195567	2.6764338	1700017D01Rik	69369	RIKEN cDNA 1700017D01 gene
A_52_P195535	2.001753	2210418O10Rik	100380879	RIKEN cDNA 2210418O10 gene
A_51_P217463	2.1362638	Cxcl2	20310	chemokine (C-X-C motif) ligand 2
A_52_P377126	2.1001873	2310047M10Rik	71923	RIKEN cDNA 2310047M10 gene
A_52_P187810	2.0271327	4921504E06Rik	70909	RIKEN cDNA 4921504E06 gene
A_52_P33593	2.2056901	Gtpbp3	70359	GTP binding protein 3
A_52_P534560	2.022318	Frmd6	319710	FERM domain containing 6
A_52_P190373	2.331826	8430437N05Rik	71561	RIKEN cDNA 8430437N05 gene
A_51_P262471	2.3122282	Xlr5c	27084	X-linked lymphocyte-regulated 5C
A_52_P552560	2.6097462	4930578I06Rik	67750	RIKEN cDNA 4930578I06 gene
A_51_P337246	4.105203	Raly	19383	hnRNP-associated with lethal yellow
A_52_P463340	3.1520836	Gjd3	353155	gap junction protein, delta 3
A_51_P366770	3.6301477	Rims1	116837	regulating synaptic membrane exocytosis 1
A_52_P923414	2.8863173
A_51_P330918	2.443339
A_51_P375146	2.0741618	Cd36	12491	CD36 antigen
A_51_P305752	2.2617958	1700121L16Rik	76643	RIKEN cDNA 1700121L16 gene
A_51_P507242	2.2325556	Fosl2	14284	fos-like antigen 2
A_51_P378428	2.4243848
A_52_P452689	2.5678694	Atf3	11910	activating transcription factor 3
A_52_P539761	2.1258101	Pde4b	18578	phosphodiesterase 4B, cAMP specific
A_51_P380778	2.2239478	A730056A06Rik	319783	RIKEN cDNA A730056A06 gene
DCP_20_1	4.2862706
A_51_P337269	2.26429	Aldob	230163	aldolase B, fructose-bisphosphate
A_51_P408800	2.0615487	Rftn1	76438	raftlin lipid raft linker 1
A_51_P508300	2.0127616	Kcnn3	140493	potassium intermediate/small conductance calcium-activated channel, subfamily N, member 3
A_51_P413005	2.3990755	Chn2	69993	chimerin (chimaerin) 2
A_52_P546699	2.0666523	Olfr1500	258097	olfactory receptor 1500
A_51_P184886	3.144246	Abcg2	26357	ATP-binding cassette, sub-family G (WHITE), member 2
A_52_P955951	2.1864905
A_52_P9795	2.2833917	Cirh1a	21771	cirrhosis, autosomal recessive 1A (human)
A_51_P203393	2.2017782	Ankrd33b	67434	ankyrin repeat domain 33B
A_51_P505132	2.4845712	Rsad2	58185	radical S-adenosyl methionine domain containing 2
A_52_P279329	2.307278	Acvrl1	11482	activin A receptor, type II-like 1
A_52_P941128	2.9325109
A_51_P157612	2.3546345	Robo2	268902	roundabout homolog 2 (Drosophila)
A_52_P932189	2.0416439
A_52_P3229	2.3691812	Cnr2	12802	cannabinoid receptor 2 (macrophage)
A_51_P252947	3.306578	Mapk8ip1	19099	mitogen-activated protein kinase 8 interacting protein 1
A_52_P479599	2.2248712	Hk1	15275	hexokinase 1
A_52_P590168	2.322297	Tg	21819	thyroglobulin
A_52_P221198	2.1827636	Rab11fip5	52055	RAB11 family interacting protein 5 (class I)
A_51_P266824	2.1625173
A_52_P267717	2.317682	Cd209b	69165	CD209b antigen
A_52_P319541	2.5840707	Med12l	329650	mediator of RNA polymerase II transcription, subunit 12 homolog (yeast)-like
A_51_P112465	2.7060268	Piezo2	667742	piezo-type mechanosensitive ion channel component 2
A_52_P130362	2.0300503
A_52_P63850	2.9944541	Vwa5b2	328643	von Willebrand factor A domain containing 5B2
A_51_P156232	2.196647	Lalba	16770	lactalbumin, alpha
A_51_P310020	2.0271537	Olfr1299	258886	olfactory receptor 1299
A_52_P141384	2.4223762	Cdcp1	109332	CUB domain containing protein 1
A_51_P271074	2.1672542	Sft2d1	106489	SFT2 domain containing 1
A_52_P1101647	20.163996	Asb15	78910	ankyrin repeat and SOCS box-containing 15
A_51_P323755	2.1955128	Mycbp2	105689	MYC binding protein 2
A_52_P655120	2.628466	Grik2	14806	glutamate receptor, ionotropic, kainate 2 (beta 2)
DCP_20_0	4.200734
A_51_P149002	2.4476967	Nkx2-6	18092	NK2 homeobox 6
A_51_P319562	2.1464612	Ank2	109676	ankyrin 2, brain
A_52_P1092157	2.6472445	9330123L03Rik	319238	RIKEN cDNA 9330123L03 gene
A_52_P423795	2.41794	Gm9777	100049163	predicted gene 9777
A_52_P120132	2.0858974	6030452D12Rik	330837	RIKEN cDNA 6030452D12 gene
A_51_P249286	2.1124072	Rgs16	19734	regulator of G-protein signaling 16
A_52_P1156864	2.5177643	LOC101056204	101056204	uncharacterized LOC101056204
A_52_P17430	2.0457842
A_52_P715388	2.190353
A_52_P1101014	2.5659645
A_52_P340167	2.3270354	Acacb	100705	acetyl-Coenzyme A carboxylase beta
A_52_P359301	3.1321511	Mettl7a1	70152	methyltransferase like 7A1
A_51_P472762	2.9072971	Harbi1	241547	harbinger transposase derived 1
A_51_P496273	2.2584052	Elf2	69257	E74-like factor 2
A_51_P300446	2.457353	Gnptab	432486	N-acetylglucosamine-1-phosphate transferase, alpha and beta subunits
A_52_P585725	2.6036222	Ppp6r2	71474	protein phosphatase 6, regulatory subunit 2
A_52_P169420	2.2685463	Dntt	21673	deoxynucleotidyltransferase, terminal
A_51_P212473	2.7443252	Tmtc3	237500	transmembrane and tetratricopeptide repeat containing 3
A_52_P662665	2.244779	Cdhr3	68764	cadherin-related family member 3
A_51_P113129	2.506085	Atp1b4	67821	ATPase, (Na+)/K+ transporting, beta 4 polypeptide
A_51_P279135	3.253452
A_51_P288531	2.5022688
A_52_P25567	2.2104485	Parn	74108	poly(A)-specific ribonuclease (deadenylation nuclease)
A_52_P359652	2.7136009	Tmem132cos	67351	Tmem132c opposite strand transcript
A_52_P519673	2.3114333	Dock8	76088	dedicator of cytokinesis 8
A_52_P617486	2.4174504	C030040A22Rik	320771	RIKEN cDNA C030040A22 gene
A_52_P261151	2.0047698	Mast2	17776	microtubule associated serine/threonine kinase 2
DCP_22_7	5.0294895
A_51_P118877	2.552011	Klf12	16597	Kruppel-like factor 12
A_52_P45738	2.178777	Trim35	66854	tripartite motif-containing 35
A_51_P426466	2.5157452	Rai2	24004	retinoic acid induced 2
A_52_P177054	3.2266083	Il22	50929	interleukin 22
A_51_P436491	2.1357708	Lingo3	237403	leucine rich repeat and Ig domain containing 3
A_52_P422540	3.0035403	Mbd5	109241	methyl-CpG binding domain protein 5
DCP_1_7	2.5532773
A_52_P178470	2.0118303	Ndrg4	234593	N-myc downstream regulated gene 4
A_51_P495462	2.343207	Gad2	14417	glutamic acid decarboxylase 2
A_51_P365666	2.6469147	Ptprh	545902	protein tyrosine phosphatase, receptor type, H
A_52_P980948	2.3162332
A_52_P642488	3.2359543	Kcnk1	16525	potassium channel, subfamily K, member 1
A_51_P453616	2.204184	1700003F17Rik	76392	RIKEN cDNA 1700003F17 gene
A_52_P35598	2.1208494	Tfcp2	21422	transcription factor CP2
A_52_P1003548	2.20279
A_52_P174166	2.0137537	Ksr2	333050	kinase suppressor of ras 2
A_52_P628667	2.5076458	AI597479	98404	expressed sequence AI597479
A_52_P1124229	2.4648335
A_51_P358906	2.2098086	U2af2	22185	U2 small nuclear ribonucleoprotein auxiliary factor (U2AF) 2
A_52_P281235	2.529792	Vps18	228545	vacuolar protein sorting 18 (yeast)
A_52_P447534	2.7954993	Cntln	338349	centlein, centrosomal protein
A_52_P127877	2.5486143	Flg	14246	filaggrin
A_52_P53507	2.000198
A_52_P659844	2.896911
A_52_P191974	2.030249
A_51_P190052	2.2412548	B130016D09Rik	436015	RIKEN cDNA B130016D09 cDNA
A_51_P109099	2.3323026	Cited4	56222	Cbp/p300-interacting transactivator, with Glu/Asp-rich carboxy-terminal domain, 4
A_52_P660722	5.27032	B630006K09Rik	320648	RIKEN cDNA B630006K09 gene
A_51_P484559	2.268982	1700011I03Rik	75444	RIKEN cDNA 1700011I03 gene
A_51_P116377	2.7892709
A_51_P407227	2.4744356	Gimap6	231931	GTPase, IMAP family member 6
A_52_P45080	3.4688046	Plxna4os2	330283	Plxna4 opposite strand transcript 2
A_52_P715852	2.1368735
A_52_P109959	2.0667396
A_51_P282837	2.1187038	St14	19143	suppression of tumorigenicity 14 (colon carcinoma)
A_52_P429450	2.3976724	Ngp	18054	neutrophilic granule protein
A_51_P397575	2.4189553	Cts7	56092	cathepsin 7
A_52_P1164479	2.0960557	Prkcdbp	109042	protein kinase C, delta binding protein
A_52_P540350	2.2104328
A_52_P234619	2.390495	Ptbp1	19205	polypyrimidine tract binding protein 1
A_51_P203277	2.3108795	Vmn1r66	171264	vomeronasal 1 receptor 66
A_51_P494561	2.0436966	Il1f10	215274	interleukin 1 family, member 10
A_51_P343517	2.8363888	Ly6d	17068	lymphocyte antigen 6 complex, locus D
A_51_P355981	2.6378381	Krtap5-2	71623	keratin associated protein 5-2
A_52_P483928	2.0026088	Cpsf4	54188	cleavage and polyadenylation specific factor 4
A_52_P542107	2.0410922
A_51_P292146	2.0575795	Ust	338362	uronyl-2-sulfotransferase
A_52_P239912	3.887467	AY761185	100503970	cDNA sequence AY761185
A_52_P383782	2.0588367	3010027C24Rik	77085	RIKEN cDNA 3010027C24 gene
A_52_P640323	2.4906409	Olfr68	18369	olfactory receptor 68
A_52_P362651	4.235122	Nrxn1	18189	neurexin I
A_51_P473170	2.6608107	Tnfsf4	22164	tumor necrosis factor (ligand) superfamily, member 4
A_52_P562827	2.1057963	Tbx4	21387	T-box 4
A_51_P124262	2.154602	Pcdh9	211712	protocadherin 9
A_52_P42537	2.2206094	Ppp1r13b	21981	protein phosphatase 1, regulatory (inhibitor) subunit 13B
A_51_P228971	2.8908417	Slc5a4b	64454	solute carrier family 5 (neutral amino acid transporters, system A), member 4b
A_51_P356467	2.360192	Cldn4	12740	claudin 4
A_52_P437850	3.2475932	Fam13c	71721	family with sequence similarity 13, member C
A_52_P747012	2.3210196
A_52_P931438	2.0704358
A_51_P280645	2.0082548	C330026N13Rik	78531	RIKEN cDNA C330026N13 gene
A_52_P565396	2.3745906	LOC676708	676708	h-2 class I histocompatibility antigen, L-D alpha chain-like
A_51_P137121	2.4419308	Mybph	53311	myosin binding protein H
A_52_P239470	2.1181645	C430002N11Rik	319707	RIKEN cDNA C430002N11 gene
A_51_P282246	2.4344506	Gm4151	100042988	predicted gene 4151
A_51_P132551	2.0163038	Trip10	106628	thyroid hormone receptor interactor 10
A_51_P475842	2.081992	Tax1bp1	52440	Tax1 (human T cell leukemia virus type I) binding protein 1
A_52_P593337	2.185359	Lyrm7	75530	LYR motif containing 7
A_52_P597634	6.5196967	Fzd1	14362	frizzled homolog 1 (Drosophila)
A_51_P358112	2.5955756	Fads1	76267	fatty acid desaturase 1
A_51_P315466	4.7248387	1600027J07Rik	69794	RIKEN cDNA 1600027J07 gene
A_52_P221824	2.0960743	Slc6a13	14412	solute carrier family 6 (neurotransmitter transporter, GABA), member 13
A_52_P405416	9.20442	Pm20d1	212933	peptidase M20 domain containing 1
A_51_P192964	3.0682027	Clec12b	71183	C-type lectin domain family 12, member B
A_51_P437692	2.0302346	Zp3r	22789	zona pellucida 3 receptor
A_52_P730513	2.626606
A_51_P271107	2.5778556	Mcf2	109904	mcf.2 transforming sequence
A_51_P212057	2.6298432	Serpinb1c	380839	serine (or cysteine) peptidase inhibitor, clade B, member 1c
A_52_P171663	3.8366013	Dnajb1	81489	DnaJ (Hsp40) homolog, subfamily B, member 1
A_52_P250161	3.0053065	Adam28	13522	a disintegrin and metallopeptidase domain 28
A_51_P381060	2.4736454	Pilrb1	170741	paired immunoglobin-like type 2 receptor beta 1
A_51_P169588	4.2575135	Dhx38	64340	DEAH (Asp-Glu-Ala-His) box polypeptide 38
A_51_P512306	4.0990357	Kirrel2	243911	kin of IRRE like 2 (Drosophila)
A_52_P367294	2.2922504	Fsd1l	319636	fibronectin type III and SPRY domain containing 1-like
A_52_P971826	3.1614275
A_52_P556908	2.5432105	Dlx6	13396	distal-less homeobox 6
A_51_P508640	2.1558843	Cd70	21948	CD70 antigen
A_52_P413756	2.4524906	Pi16	74116	peptidase inhibitor 16
A_52_P557240	2.956663	Ugt3a2	223337	UDP glycosyltransferases 3 family, polypeptide A2
A_51_P243153	2.0930552	Olfr1497	258736	olfactory receptor 1497
A_52_P571698	2.3217878	Rrp15	67223	ribosomal RNA processing 15 homolog (S. cerevisiae)
A_52_P537438	2.1429033	Mapk10	26414	mitogen-activated protein kinase 10
A_51_P115715	2.4333603	Asb2	65256	ankyrin repeat and SOCS box-containing 2
A_52_P939928	2.0879006
A_52_P867156	2.0848224
A_51_P195203	2.2367485	Arl13a	74448	ADP-ribosylation factor-like 13A
A_52_P379717	2.6443548	Gm7972	666190	predicted gene 7972
A_51_P478419	2.0189228	Unc45b	217012	unc-45 homolog B (C. elegans)
A_51_P497332	3.31964	Mycn	18109	v-myc myelocytomatosis viral related oncogene, neuroblastoma derived (avian)
A_51_P428360	2.026134	Retnlb	57263	resistin like beta
A_51_P103450	2.6460977	4930402F06Rik	74854	RIKEN cDNA 4930402F06 gene
A_52_P112021	3.023615	Slc36a4	234967	solute carrier family 36 (proton/amino acid symporter), member 4
A_51_P410576	2.2050047	Ccdc113	244608	coiled-coil domain containing 113
A_52_P112875	3.1626434	Lrrc15	74488	leucine rich repeat containing 15
A_51_P302256	2.8211946	Dlg4	13385	discs, large homolog 4 (Drosophila)
A_52_P348256	2.3768723	Mup2	17841	major urinary protein 2
A_51_P101460	2.9961257	Dsp	109620	desmoplakin
A_51_P433908	2.024915	4930524N10Rik	75071	RIKEN cDNA 4930524N10 gene
A_52_P892259	2.0309217	Dennd4a	102442	DENN/MADD domain containing 4A
A_52_P175685	2.240135	Irf1	16362	interferon regulatory factor 1
A_51_P174996	2.3577158	Slc17a6	140919	solute carrier family 17 (sodium-dependent inorganic phosphate cotransporter), member 6
A_52_P446948	2.1323254	Wbscr17	212996	Williams-Beuren syndrome chromosome region 17 homolog (human)
A_51_P359173	4.641245	Syt7	54525	synaptotagmin VII
A_51_P480136	2.2424347	Cryba2	12958	crystallin, beta A2
A_51_P488230	3.8898988	AI839979	100740	expressed sequence AI839979
A_52_P456837	2.5646653	Cyp2s1	74134	cytochrome P450, family 2, subfamily s, polypeptide 1
A_51_P230439	2.240997	Ppfibp2	19024	PTPRF interacting protein, binding protein 2 (liprin beta 2)
A_52_P94482	3.1119642	Ttyh1	57776	tweety homolog 1 (Drosophila)
A_51_P345166	3.8587654	Dnhd1	77505	dynein heavy chain domain 1
A_52_P603758	2.0935674	4933435F18Rik	71320	RIKEN cDNA 4933435F18 gene
A_51_P279841	8.523434	Blnk	17060	B cell linker
A_52_P571794	3.7602677	Pcsk5	18552	proprotein convertase subtilisin/kexin type 5
A_51_P267969	2.7400837	Reg3a	19694	regenerating islet-derived 3 alpha
A_51_P345549	2.8030796	Nkd2	72293	naked cuticle 2 homolog (Drosophila)
A_51_P390926	2.520793
A_52_P667066	2.369314	6720468P15Rik	78073	RIKEN cDNA 6720468P15 gene
A_52_P593200	2.09642	Srxn1	76650	sulfiredoxin 1 homolog (S. cerevisiae)
A_51_P290207	2.0303972	Insig1	231070	insulin induced gene 1
A_52_P563908	2.1787221	Prox1	19130	prospero-related homeobox 1
A_51_P115346	2.7613668	P2rx6	18440	purinergic receptor P2X, ligand-gated ion channel, 6
A_51_P463803	2.4736376
A_51_P485918	2.3043115	Hspb11	72938	heat shock protein family B (small), member 11
A_51_P475589	2.2496161	Stx1b	56216	syntaxin 1B
A_51_P123345	2.3113382	Arf2	11841	ADP-ribosylation factor 2
A_51_P210814	2.7431219	Nudt18	213484	nudix (nucleoside diphosphate linked moiety X)-type motif 18
A_52_P1027748	2.419099	Gm5897	545963	predicted gene 5897
A_52_P111145	2.4516401	Gabbr2	242425	gamma-aminobutyric acid (GABA) B receptor, 2
A_52_P607820	2.8708727
A_52_P395397	2.0693083	Aars	234734	alanyl-tRNA synthetase
A_51_P206872	2.660377	Olfr982	258853	olfactory receptor 982
A_52_P498441	2.0116472	Oprm1	18390	opioid receptor, mu 1
A_51_P510437	2.320785	Slc25a15	18408	solute carrier family 25 (mitochondrial carrier ornithine transporter), member 15
A_52_P365342	2.115702	Lrrn2	16980	leucine rich repeat protein 2, neuronal
A_51_P243978	2.0868735
A_52_P487686	2.2376397	BC100530	100034684	cDNA sequence BC100530
A_51_P367880	2.1222634	Krt84	16680	keratin 84
A_51_P182796	2.092475	Tgm2	21817	transglutaminase 2, C polypeptide
A_51_P432011	2.6730032	Gm9744	100036541	predicted gene 9744
A_52_P235880	2.2028387	Gm5134	333669	predicted gene 5134
A_52_P371971	2.253262	Gm16404	100039055	predicted gene 16404
A_51_P169567	2.202845	Nfkbil1	18038	nuclear factor of kappa light polypeptide gene enhancer in B cells inhibitor like 1
A_52_P1069249	2.3924096
A_52_P609375	3.547576	Raver2	242570	ribonucleoprotein, PTB-binding 2
A_51_P373619	2.4807591	Mbl1	17194	mannose-binding lectin (protein A) 1
A_52_P310907	2.1793382	Ston2	108800	stonin 2
A_51_P369906	2.6882334	Olah	99035	oleoyl-ACP hydrolase
A_52_P93547	2.285331
A_52_P594944	2.721096	Olfr91	258470	olfactory receptor 91
A_51_P476428	2.379563	Lrp1b	94217	low density lipoprotein-related protein 1B (deleted in tumors)
A_52_P81101	2.1255677	Ipmk	69718	inositol polyphosphate multikinase
A_52_P206002	2.2075713	Defa22	382059	defensin, alpha, 22
A_52_P9671	3.2189982	Ceacam2	26367	carcinoembryonic antigen-related cell adhesion molecule 2
A_52_P730476	2.0159545	4930553I04Rik	75244	RIKEN cDNA 4930553I04 gene
A_51_P103081	2.6301441	Gm4262	100043147	predicted gene 4262
A_51_P495311	3.7819736	Cd209e	170780	CD209e antigen
A_52_P979517	5.0070086
A_51_P441312	2.142322
A_52_P431974	2.6526163	Fgfbp3	72514	fibroblast growth factor binding protein 3
A_52_P716032	3.1509724	AI646519	99041	expressed sequence AI646519
A_52_P429486	4.57134
A_52_P537492	2.1561742	Tmx2	66958	thioredoxin-related transmembrane protein 2
A_52_P472523	2.402802	Sacs	50720	sacsin
A_52_P420479	2.8136044	Hand2	15111	heart and neural crest derivatives expressed transcript 2
A_52_P406490	2.6779435	Zfp106	20402	zinc finger protein 106
A_51_P219444	2.3215845	Plcl2	224860	phospholipase C-like 2
A_52_P203404	3.128602	Ttc24	214191	tetratricopeptide repeat domain 24
A_52_P551129	2.1783786	Grm7	108073	glutamate receptor, metabotropic 7
A_52_P1051881	2.2134955
A_51_P401386	2.8285973
A_51_P330125	2.0220559	Srxn1	76650	sulfiredoxin 1 homolog (S. cerevisiae)
A_51_P204121	3.0360093	Nudt6	229228	nudix (nucleoside diphosphate linked moiety X)-type motif 6
A_51_P257972	2.468658
A_51_P450955	2.5879736	Leprel4	66180	leprecan-like 4
A_52_P515282	2.3055372	1110051M20Rik	228356	RIKEN cDNA 1110051M20 gene
A_52_P962354	2.6332588	1700029N11Rik	69491	RIKEN cDNA 1700029N11 gene
A_52_P57205	2.1034703	Irs4	16370	insulin receptor substrate 4
A_52_P411205	2.1163692
A_51_P364786	2.496989	U2af1	108121	U2 small nuclear ribonucleoprotein auxiliary factor (U2AF) 1
A_51_P256632	2.9853427	Pla2g2a	18780	phospholipase A2, group IIA (platelets, synovial fluid)
A_52_P460257	2.289476	Nrbp1	192292	nuclear receptor binding protein 1
A_51_P110914	2.045636	1700010D01Rik	76386	RIKEN cDNA 1700010D01 gene
A_51_P492047	2.8359613	Fam3b	52793	family with sequence similarity 3, member B
A_52_P497174	4.2689166	F830004M19Rik	320224	RIKEN cDNA F830004M19 gene
A_52_P438144	2.7498088	Usp29	57775	ubiquitin specific peptidase 29
A_52_P428496	4.386083	Rhoa	11848	ras homolog gene family, member A
A_51_P108226	2.5646684	1100001G20Rik	66107	RIKEN cDNA 1100001G20 gene
A_51_P417747	2.002339	Kap	16483	kidney androgen regulated protein
A_52_P41985	2.1665118	Rnps1	19826	ribonucleic acid binding protein S1
A_52_P397149	2.1473713
A_52_P504237	2.16853	Ceacam19	319930	carcinoembryonic antigen-related cell adhesion molecule 19
A_52_P419348	2.0769782	Stxbp5l	207227	syntaxin binding protein 5-like
A_51_P195916	3.5928652
A_51_P124568	22.197874	Mpp1	17524	membrane protein, palmitoylated
A_51_P159986	2.3834207	Olfr1423	258675	olfactory receptor 1423
A_51_P245796	2.1989198	Ddit4	74747	DNA-damage-inducible transcript 4
A_52_P104530	2.0290325
A_52_P266643	2.0318189	9630033F20Rik	319801	RIKEN cDNA 9630033F20 gene
A_52_P371466	2.0456839	Ncaph2	52683	non-SMC condensin II complex, subunit H2
A_52_P512575	2.5547543	Hopx	74318	HOP homeobox
A_51_P453129	2.134181	Nupr1l	69034	nuclear protein transcriptional regulator 1 like
A_51_P299031	2.047019
A_51_P153486	2.1759148	Dnajb1	81489	DnaJ (Hsp40) homolog, subfamily B, member 1
A_51_P256510	2.2630918	Gtpbp1	14904	GTP binding protein 1
A_51_P377528	2.209362	Oprk1	18387	opioid receptor, kappa 1
A_51_P499876	2.1342568	S1pr2	14739	sphingosine-1-phosphate receptor 2
A_52_P518507	2.008559	Me3	109264	malic enzyme 3, NADP(+)-dependent, mitochondrial
A_51_P196997	2.0622482	Soat2	223920	sterol O-acyltransferase 2
A_51_P315344	2.6605752	Zfp677	210503	zinc finger protein 677
A_52_P277220	2.6912615	Zfp40	22700	zinc finger protein 40
A_52_P585124	2.7212493	Cxcr4	12767	chemokine (C-X-C motif) receptor 4
A_51_P206708	2.2135015	Acox2	93732	acyl-Coenzyme A oxidase 2, branched chain
A_52_P669425	2.0938807	Gclm	14630	glutamate-cysteine ligase, modifier subunit
A_51_P164256	2.5985854
A_52_P20906	2.8081653	Twist1	22160	twist basic helix-loop-helix transcription factor 1
A_52_P669212	2.0039754
A_52_P578744	2.3248549	5430416O09Rik	71406	RIKEN cDNA 5430416O09 gene
A_51_P358908	2.4194388	U2af2	22185	U2 small nuclear ribonucleoprotein auxiliary factor (U2AF) 2
A_52_P571290	2.3655117	Ptms	69202	parathymosin
A_52_P25170	3.0827737
A_51_P225493	2.7714715	1700016C15Rik	69428	RIKEN cDNA 1700016C15 gene
A_52_P473266	2.0309153
A_52_P206322	2.1171305	LOC101055692	101055692	Ig kappa chain V-V region L7-like
A_52_P237997	2.8113112	Negr1	320840	neuronal growth regulator 1
A_51_P128075	2.2894366	Tescl	69301	tescalcin-like
A_51_P178083	2.044026	Resp18	19711	regulated endocrine-specific protein 18
A_51_P517645	2.451052	Plet1os	69631	Plet1 opposite strand transcript
A_52_P142888	3.2459235	Clec5a	23845	C-type lectin domain family 5, member a
A_52_P621357	2.3223932
A_52_P638867	2.5494778	Xpo5	72322	exportin 5
A_52_P174721	2.0534277	Defb20	319579	defensin beta 20
A_51_P220806	2.147304	Gdf9	14566	growth differentiation factor 9
A_52_P739547	2.1582808
A_51_P318999	2.5196579	Cdx1	12590	caudal type homeobox 1
A_52_P331762	3.7896984	Lmo1	109594	LIM domain only 1
A_52_P1035635	2.1396527
A_52_P312595	2.071583
A_52_P490964	2.0717983
A_52_P616007	2.049224
A_51_P326191	5.4832234	Serpina3g	20715	serine (or cysteine) peptidase inhibitor, clade A, member 3G
A_52_P272519	2.4133315	Copa	12847	coatomer protein complex subunit alpha
A_52_P144946	2.0284226	4930506M07Rik	71653	RIKEN cDNA 4930506M07 gene
A_51_P378381	2.669069	4933436C20Rik	71296	RIKEN cDNA 4933436C20 gene
A_52_P393392	2.0393624	Insig1	231070	insulin induced gene 1
A_52_P662013	2.126535	Plg	18815	plasminogen
A_51_P502599	2.1635742	Cyp2c40	13099	cytochrome P450, family 2, subfamily c, polypeptide 40
A_51_P181746	2.5403678	Zfyve1	217695	zinc finger, FYVE domain containing 1
A_52_P476775	2.4882684	Mdfi	17240	MyoD family inhibitor
A_51_P127456	2.0181534	Ppp1r37	232947	protein phosphatase 1, regulatory subunit 37
A_51_P267861	2.3995352	Kcnk5	16529	potassium channel, subfamily K, member 5
A_52_P607212	2.0031688	Plcd4	18802	phospholipase C, delta 4
A_52_P296996	2.3470123	Slc9a8	77031	solute carrier family 9 (sodium/hydrogen exchanger), member 8
A_51_P326449	2.0083032	6030442H21Rik	77070	RIKEN cDNA 6030442H21 gene
A_52_P71704	2.0658462	Kcne1	16509	potassium voltage-gated channel, Isk-related subfamily, member 1
A_52_P607393	2.2040856
A_52_P475630	2.052592	Smchd1	74355	SMC hinge domain containing 1
A_52_P11061	2.4215577	Tomm70a	28185	translocase of outer mitochondrial membrane 70 homolog A (yeast)
A_52_P455619	2.2391655	Gipr	381853	gastric inhibitory polypeptide receptor
A_51_P114094	2.4359796	Clstn3	232370	calsyntenin 3
A_51_P167668	2.047169	Myh3	17883	myosin, heavy polypeptide 3, skeletal muscle, embryonic
A_52_P210078	2.2144492	Acta2	11475	actin, alpha 2, smooth muscle, aorta
A_52_P487599	3.165455	Thnsl2	232078	threonine synthase-like 2 (bacterial)
A_52_P557477	3.756377	Zfp609	214812	zinc finger protein 609
A_51_P171883	2.2905526	Palmd	114301	palmdelphin
A_51_P203710	3.0702887	Taf8	63856	TAF8 RNA polymerase II, TATA box binding protein (TBP)-associated factorq
A_51_P113322	2.009912	Nlrp4a	243880	NLR family, pyrin domain containing 4A
A_52_P511634	2.0280735	Dip2b	239667	DIP2 disco-interacting protein 2 homolog B (Drosophila)
A_52_P1036629	2.0961182
A_51_P341543	2.6691527	Defb7	246080	defensin beta 7
A_51_P381550	2.8648527	1700010B13Rik	100503661	RIKEN cDNA 1700010B13 gene
A_51_P284503	2.564369	Krtap22-2	68740	keratin associated protein 22-2
A_51_P406527	4.006776	Kcnd2	16508	potassium voltage-gated channel, Shal-related family, member 2
A_52_P558931	2.4037514	Lipi	320355	lipase, member I
A_52_P124183	2.5166898
A_52_P411780	2.1397765	Hdac9	79221	histone deacetylase 9
A_52_P787975	2.179304
A_52_P196776	2.8620462	Slc6a18	22598	solute carrier family 6 (neurotransmitter transporter), member 18
A_51_P453569	3.1431649	Olfr943	258323	olfactory receptor 943
A_52_P504254	2.6195598	Adtrp	109254	androgen dependent TFPI regulating protein
A_52_P68963	2.402651	Vmn1r23	171197	vomeronasal 1 receptor 23
A_51_P103133	2.3014433
A_51_P489192	2.2169158	Postn	50706	periostin, osteoblast specific factor
A_52_P1163884	2.8501606
A_51_P242967	2.3239844	Piwil2	57746	piwi-like RNA-mediated gene silencing 2
A_52_P907202	2.0433602
A_52_P385767	2.33893
A_51_P238009	2.1108756	Loxhd1	240411	lipoxygenase homology domains 1
A_52_P94937	2.4484649	4930592I03Rik	75853	RIKEN cDNA 4930592I03 gene
A_51_P515883	2.246634	Plac8	231507	placenta-specific 8
A_52_P156734	2.6320841	Enthd1	383075	ENTH domain containing 1
A_52_P1123424	2.2887485
A_51_P278519	2.6928768	Qsox1	104009	quiescin Q6 sulfhydryl oxidase 1
A_52_P463295	2.5432084	Olfr1141	258630	olfactory receptor 1141
A_52_P476535	2.185443	Defa23	497114	defensin, alpha, 23
A_51_P319386	2.1796186	Myo15	17910	myosin XV
A_52_P569028	2.3739595	Cacng2	12300	calcium channel, voltage-dependent, gamma subunit 2
A_51_P297140	2.2580724	Fbxo40	207215	F-box protein 40
A_52_P118516	2.053194	Mroh1	223658	maestro heat-like repeat family member 1
A_51_P289193	2.9911337	Aff3	16764	AF4/FMR2 family, member 3
A_52_P94149	2.586433	4933415F23Rik	66755	RIKEN cDNA 4933415F23 gene
A_51_P224903	2.7334569	Rgs4	19736	regulator of G-protein signaling 4
A_52_P121440	2.2138674
A_52_P1139438	2.8457587	A430106A03Rik	77776	RIKEN cDNA A430106A03 gene
A_52_P615877	2.4116929	Cdc25b	12531	cell division cycle 25B
A_51_P288608	2.3826957	Satl1	73809	spermidine/spermine N1-acetyl transferase-like 1
A_52_P386109	2.0647151
A_52_P30632	3.6727128	1700007K13Rik	69327	RIKEN cDNA 1700007K13 gene
A_52_P812372	2.0299625
A_51_P267441	3.8858309	Them5	66198	thioesterase superfamily member 5
A_52_P633719	2.3780093
A_51_P238665	2.6728754	Otop3	69602	otopetrin 3
A_52_P328365	2.2068784	Lrrc16b	268747	leucine rich repeat containing 16B
A_51_P460570	2.1198268	Grin2a	14811	glutamate receptor, ionotropic, NMDA2A (epsilon 1)
A_52_P77764	2.317978	Slc7a2	11988	solute carrier family 7 (cationic amino acid transporter, y+ system), member 2
A_52_P493322	2.1315906	Zfp866	330788	zinc finger protein 866
A_51_P236074	2.12184	Prl7a2	19114	prolactin family 7, subfamily a, member 2
A_52_P1089323	2.2413313	Rbm44	329207	RNA binding motif protein 44
A_52_P1162808	2.6306727	2310026I22Rik	69593	RIKEN cDNA 2310026I22 gene
A_51_P259902	2.4611695	Arl6ip5	65106	ADP-ribosylation factor-like 6 interacting protein 5
A_52_P1075623	2.21013
A_51_P409452	3.1878762	Cldn11	18417	claudin 11
A_52_P170635	2.5128639	Sirpa	19261	signal-regulatory protein alpha
A_52_P600274	2.1449564	Trib3	228775	tribbles homolog 3 (Drosophila)
A_51_P191154	2.0995855
A_51_P350666	2.4468787	Peli2	93834	pellino 2
A_51_P303696	2.1747804	4922505E12Rik	433386	RIKEN cDNA 4922505E12 gene
A_52_P592305	2.5495965	Kcnc1	16502	potassium voltage gated channel, Shaw-related subfamily, member 1
A_52_P9878	2.0360804	Mef2b	17259	myocyte enhancer factor 2B
A_52_P142520	2.042388	Tex2	21763	testis expressed gene 2
A_52_P193611	2.4012935	Pkd2l1	329064	polycystic kidney disease 2-like 1
A_52_P622877	2.3930674	Zic3	22773	zinc finger protein of the cerebellum 3
A_51_P361348	2.07698
A_52_P389965	2.4619102	Akr1cl	70861	aldo-keto reductase family 1, member C-like
A_52_P794570	2.4660506	8030476L19Rik	77167	RIKEN cDNA 8030476L19 gene
A_52_P33221	2.0897684	Apbb1ip	54519	amyloid beta (A4) precursor protein-binding, family B, member 1 interacting protein
A_51_P491886	2.0742283	Trpc5	22067	transient receptor potential cation channel, subfamily C, member 5
A_52_P267243	2.0281322	Fgf13	14168	fibroblast growth factor 13
A_52_P867713	2.2717133
A_51_P169270	3.1960459	Ciapin1	109006	cytokine induced apoptosis inhibitor 1
A_51_P398260	2.1157987	Tppp	72948	tubulin polymerization promoting protein
A_52_P611132	2.4993253	Cdh26	381409	cadherin-like 26
A_52_P372418	2.555374
A_52_P245648	2.3197513	Slc3a2	17254	solute carrier family 3 (activators of dibasic and neutral amino acid transport), member 2
A_52_P422874	2.055754	5031439G07Rik	223739	RIKEN cDNA 5031439G07 gene
A_52_P531651	3.2868352	Parvg	64099	parvin, gamma
A_51_P177015	2.2537048	Olfr143	258802	olfactory receptor 143
A_52_P676861	3.1195238	Lin28b	380669	lin-28 homolog B (C. elegans)
A_51_P363495	2.3019612	5031434C07Rik	100503613	RIKEN cDNA 5031434C07 gene
A_52_P535561	2.123198	Txndc5	105245	thioredoxin domain containing 5
A_52_P971238	3.3548996	1700048G13Rik	78624	RIKEN cDNA 1700048G13 gene
A_52_P302371	2.2030926	Kcng3	225030	potassium voltage-gated channel, subfamily G, member 3
A_52_P426768	2.025674	Cited4	56222	Cbp/p300-interacting transactivator, with Glu/Asp-rich carboxy-terminal domain, 4
A_52_P614303	7.0758767	Kif21b	16565	kinesin family member 21B
A_51_P200494	2.195412	Klk1b1	16623	kallikrein 1-related peptidase b1
A_52_P636038	3.228476	Park2	50873	Parkinson disease (autosomal recessive, juvenile) 2, parkin
A_52_P1082755	4.040328	2900018K06Rik	72892	RIKEN cDNA 2900018K06 gene
A_51_P293538	2.4316144	Ppp1r1a	58200	protein phosphatase 1, regulatory (inhibitor) subunit 1A
A_52_P126984	2.3850327	Snrnp200	320632	small nuclear ribonucleoprotein 200 (U5)
A_52_P252078	2.1424212
A_51_P151316	2.3079972	Gabra5	110886	gamma-aminobutyric acid (GABA) A receptor, subunit alpha 5
A_52_P1052138	2.0007622
A_51_P411874	2.1728265	Ankhd1	108857	ankyrin repeat and KH domain containing 1
A_51_P505803	2.0662594	Gdap1l1	228858	ganglioside-induced differentiation-associated protein 1-like 1
A_52_P582619	3.439871	6330415G19Rik	320020	RIKEN cDNA 6330415G19 gene
A_51_P350830	3.8116093
A_52_P229943	3.247964	Slc51b	330962	solute carrier family 51, beta subunit
A_51_P462569	2.2323763	Ccdc105	70976	coiled-coil domain containing 105
A_52_P415335	3.5895662	Plce1	74055	phospholipase C, epsilon 1
A_51_P488910	2.7127075	Syne3	212073	spectrin repeat containing, nuclear envelope family member 3
A_51_P163038	3.064908	Slco4a1	108115	solute carrier organic anion transporter family, member 4a1
A_52_P460308	2.2390447	Dcaf8	98193	DDB1 and CUL4 associated factor 8
A_51_P168392	2.6594045	Ttc30a1	78802	tetratricopeptide repeat domain 30A1
A_51_P330922	2.016256	Habp2	226243	hyaluronic acid binding protein 2
A_51_P428297	2.310153	1700084M14Rik	73487	RIKEN cDNA 1700084M14 gene
A_51_P390239	2.829189	Kremen1	84035	kringle containing transmembrane protein 1
A_52_P207194	3.3708177	Dgkg	110197	diacylglycerol kinase, gamma
A_51_P136181	2.2680135
A_51_P413614	2.2687807	Abca4	11304	ATP-binding cassette, sub-family A (ABC1), member 4
A_52_P266224	2.3629785	Exoc2	66482	exocyst complex component 2
A_52_P322976	2.0097873
A_51_P447955	2.2534988	Kcnk16	74571	potassium channel, subfamily K, member 16
A_51_P234488	2.593665	Tmod2	50876	tropomodulin 2
A_52_P174771	2.6973128	Atg4b	66615	autophagy related 4B, cysteine peptidase
A_52_P426601	2.5932226	1700022A22Rik	71120	RIKEN cDNA 1700022A22 gene
A_51_P153805	2.70115
A_52_P223168	2.187054
A_51_P329460	2.1005914	Gja3	14611	gap junction protein, alpha 3
A_52_P311976	2.505553	9330175E14Rik	320377	RIKEN cDNA 9330175E14 gene
A_52_P152179	2.191716	Olfr961	258497	olfactory receptor 961
A_52_P74320	2.7635705	Rorb	225998	RAR-related orphan receptor beta
A_51_P102438	2.0396998	Ugt2b36	231396	UDP glucuronosyltransferase 2 family, polypeptide B36
A_52_P62484	2.1160598	Ssu2	243612	ssu-2 homolog (C. elegans)
A_51_P309727	3.359506	Cyp11a1	13070	cytochrome P450, family 11, subfamily a, polypeptide 1
A_51_P264934	5.4347134	Matn4	17183	matrilin 4
A_52_P533731	2.5410001
A_52_P1061559	2.0777454
A_52_P311313	2.6743596	Hcn1	15165	hyperpolarization-activated, cyclic nucleotide-gated K+ 1
A_51_P395011	2.7577696	Bak1	12018	BCL2-antagonist/killer 1
A_51_P248344	2.5701573	Tfap2b	21419	transcription factor AP-2 beta
A_51_P393718	2.0903893	Olfr887	258415	olfactory receptor 887
A_52_P173352	7.8913393	Spin2d	100504429	spindlin family, member 2D
A_52_P340408	2.2241106	Ccdc108	241116	coiled-coil domain containing 108
A_51_P247172	2.098831	Wdr96	100048534	WD repeat domain 96
A_51_P308549	3.4774814	Dnaja4	58233	DnaJ (Hsp40) homolog, subfamily A, member 4
A_51_P350033	2.296212	Lrat	79235	lecithin-retinol acyltransferase (phosphatidylcholine-retinol-O-acyltransferase)
A_52_P1018726	2.521994	4921515E04Rik	70886	RIKEN cDNA 4921515E04 gene
A_51_P421675	2.2965117
A_51_P325135	2.738937
A_52_P665071	2.1865566
A_51_P164255	2.8919532	BC051019	57355	cDNA sequence BC051019
A_51_P302503	2.7677796	Ppp1r15a	17872	protein phosphatase 1, regulatory (inhibitor) subunit 15A
A_51_P147302	2.0212266	E230008N13Rik	381522	RIKEN cDNA E230008N13 gene
A_52_P221145	3.5034387	Gm17359	100233207	predicted gene, 17359
A_51_P153581	2.4088743	Dmrtc1c2	668357	DMRT-like family C1c2
A_51_P416308	3.3263316	Dnah9	237806	dynein, axonemal, heavy chain 9
A_52_P103784	2.9775045	Gpr156	239845	G protein-coupled receptor 156
A_51_P178392	2.0805738	Ttc18	76670	tetratricopeptide repeat domain 18
A_52_P581239	2.111046
A_52_P1196439	2.2216969	Cdh10	320873	cadherin 10
A_51_P277275	2.314491	Rit2	19762	Ras-like without CAAX 2
A_51_P473363	2.3053975	Olfr1264	258206	olfactory receptor 1264
A_51_P385928	2.7084122	Prom2	192212	prominin 2
A_51_P399472	2.3271198	Catsperg2	76718	catsper channel auxiliary subunit gamma 2
A_52_P577315	2.6997654	C730002L08Rik	320155	RIKEN cDNA C730002L08 gene
A_52_P548883	2.1387177
A_52_P271511	2.0679057	Cd28	12487	CD28 antigen
A_52_P193301	2.0966456	Chmp4c	66371	charged multivesicular body protein 4C
A_51_P132210	2.0701308	2810049E08Rik	72677	RIKEN cDNA 2810049E08 gene
A_52_P471787	2.2590125
A_51_P326685	2.3007243	Lrtm1	319476	leucine-rich repeats and transmembrane domains 1
A_51_P377826	2.0773273	Zfand2a	100494	zinc finger, AN1-type domain 2A
A_51_P237910	4.2274737
A_51_P414305	2.0020823	Acot12	74156	acyl-CoA thioesterase 12
A_52_P218990	2.2176106	H2afy2	404634	H2A histone family, member Y2
A_52_P605546	2.013323	Sdccag3	68112	serologically defined colon cancer antigen 3
A_52_P105429	2.065123	Adarb2	94191	adenosine deaminase, RNA-specific, B2
A_52_P299535	2.8879204	Pkdcc	106522	protein kinase domain containing, cytoplasmic
A_52_P400249	2.1097584	A730046J19Rik	319764	RIKEN cDNA A730046J19 gene
A_51_P279693	2.1703393	Cyp1a1	13076	cytochrome P450, family 1, subfamily a, polypeptide 1
A_52_P1164828	2.2397885
A_51_P270213	2.720532	Ceacam11	66996	carcinoembryonic antigen-related cell adhesion molecule 11
A_51_P400279	2.5090656	Ankrd7	75196	ankyrin repeat domain 7
A_52_P70949	2.0797544	Khdc1c	433278	KH domain containing 1C
A_52_P54906	2.1504748
A_51_P114403	2.0151422
A_51_P314375	2.8671305	Serpinc1	11905	serine (or cysteine) peptidase inhibitor, clade C (antithrombin), member 1
A_51_P230382	2.6383262	Etv4	18612	ets variant gene 4 (E1A enhancer binding protein, E1AF)
A_52_P302304	2.0262775	Qsox1	104009	quiescin Q6 sulfhydryl oxidase 1
A_52_P580853	2.0502474	Ccr2	12772	chemokine (C-C motif) receptor 2
A_52_P487127	2.4788115	Cnot3	232791	CCR4-NOT transcription complex, subunit 3
A_51_P136373	2.1358142	Strada	72149	STE20-related kinase adaptor alpha
A_52_P205695	2.5517082	Mettl7a1	70152	methyltransferase like 7A1
A_51_P110283	2.0185533
A_51_P292196	2.2455204	Prl7d1	18814	prolactin family 7, subfamily d, member 1
A_51_P476518	2.2582598	Fam83g	69640	family with sequence similarity 83, member G
A_51_P153557	2.055892	Hspa12a	73442	heat shock protein 12A
A_51_P176537	3.234622	Cypt7	664725	cysteine-rich perinuclear theca 7
A_52_P607331	2.8078818	Pggt1b	225467	protein geranylgeranyltransferase type I, beta subunit
A_52_P19711	2.010931	Bgn	12111	biglycan
A_52_P407022	2.233161	Rab5b	19344	RAB5B, member RAS oncogene family
A_51_P358714	2.4633665
A_52_P116134	2.466634	Aldh2	11669	aldehyde dehydrogenase 2, mitochondrial
A_52_P376169	3.1874945	Lypd6	320343	LY6/PLAUR domain containing 6
A_52_P165842	2.154419	Cirh1a	21771	cirrhosis, autosomal recessive 1A (human)
A_51_P207031	2.1514716	Ncf1	17969	neutrophil cytosolic factor 1
A_52_P867796	2.3265827
A_52_P139395	2.285917	Scnn1a	20276	sodium channel, nonvoltage-gated 1 alpha
A_51_P424298	2.0725815	Myo7b	17922	myosin VIIB
A_51_P349532	2.1464002	Trim26	22670	tripartite motif-containing 26
A_52_P113190	2.6414266	Myo1f	17916	myosin IF
A_52_P329670	2.0948534
A_51_P487555	2.1631167	Cd7	12516	CD7 antigen
A_52_P39724	2.1369038	Braf	109880	Braf transforming gene
A_52_P169412	2.4279358	Camk2d	108058	calcium/calmodulin-dependent protein kinase II, delta
A_52_P160453	2.237871	Stpg2	381476	sperm tail PG rich repeat containing 2
A_52_P65480	2.3084676	Pcdhga4	93712	protocadherin gamma subfamily A, 4
A_52_P555957	2.075087	Il7r	16197	interleukin 7 receptor
A_52_P231012	2.1821856	Dlx6os1	320038	Dlx6 opposite strand transcript 1
A_51_P261689	3.2128723	Ube2s	77891	ubiquitin-conjugating enzyme E2S
A_52_P72929	2.2158055	Tcra	21473	T cell receptor alpha chain
A_52_P558108	2.7082937	1700031M16Rik	73302	RIKEN cDNA 1700031M16 gene
A_52_P33403	2.0960224	Cntnap5a	636808	contactin associated protein-like 5A
A_51_P307650	2.4900844	Nmu	56183	neuromedin U
A_51_P286671	2.1683698	Tsga10	211484	testis specific 10
A_52_P1036640	2.0511253
A_51_P503671	5.1929936	Syt13	80976	synaptotagmin XIII
A_52_P515880	2.9762	Vsnl1	26950	visinin-like 1
A_51_P171557	3.0068355	Chtf8	214987	CTF8, chromosome transmission fidelity factor 8
A_51_P412289	2.1969023
A_52_P439715	2.0237057
A_51_P216965	2.6565168	Fkbp10	14230	FK506 binding protein 10
A_52_P321115	2.192569	Nufip1	27275	nuclear fragile X mental retardation protein interacting protein 1
A_51_P360508	2.29706	Tmem143	70209	transmembrane protein 143
A_51_P337662	3.5935824	Ddx26b	236790	DEAD/H (Asp-Glu-Ala-Asp/His) box polypeptide 26B
A_51_P330044	2.2570088	Cyp2j9	74519	cytochrome P450, family 2, subfamily j, polypeptide 9
A_51_P318856	2.6665673	Glyat	107146	glycine-N-acyltransferase
A_52_P955890	2.0451787
A_52_P714957	3.2082398
A_51_P343443	2.1474137	Olfr1436	258682	olfactory receptor 1436
A_52_P197179	3.850053
A_52_P537350	2.945238	Pdgfrl	68797	platelet-derived growth factor receptor-like
A_51_P197064	2.1190479	Tktl2	74419	transketolase-like 2
A_51_P333460	2.0968382	5430427O19Rik	71398	RIKEN cDNA 5430427O19 gene
A_52_P964424	2.3906186
A_52_P226302	2.017038	Gm2447	329639	predicted gene 2447
A_52_P818794	2.8049
A_51_P237893	2.793198	Itgb3	16416	integrin beta 3
A_51_P140829	2.1890872
A_52_P498128	2.8952417	Ccdc94	72886	coiled-coil domain containing 94
A_51_P135802	2.390597	Mef2c	17260	myocyte enhancer factor 2C
A_52_P14856	2.0732777	D16Ertd519e	52645	DNA segment, Chr 16, ERATO Doi 519, expressed
A_51_P286423	2.1132748	Foxd3	15221	forkhead box D3
A_51_P329003	2.6104605	Slc25a31	73333	solute carrier family 25 (mitochondrial carrier; adenine nucleotide translocator), member 31
A_52_P684066	2.3054218	1110014L15Rik	66127	RIKEN cDNA 1110014L15 gene
A_52_P408558	2.978141
A_52_P615491	2.497025	Cntnap5a	636808	contactin associated protein-like 5A
A_51_P381957	2.1860647
A_52_P1067704	2.3687146
A_51_P478326	3.2708364	Akt1s1	67605	AKT1 substrate 1 (proline-rich)
A_51_P163958	3.7009866	Spr	20751	sepiapterin reductase
A_52_P261868	2.0937119	Rgs3	50780	regulator of G-protein signaling 3
A_51_P269053	2.162223	1700109F18Rik	73429	RIKEN cDNA 1700109F18 gene
A_51_P137578	2.1599574	Fam78b	226610	family with sequence similarity 78, member B
A_51_P109412	2.3851256	Krtap19-5	16704	keratin associated protein 19-5
A_52_P347723	3.355512
A_51_P406739	2.0567636	St8sia5	225742	ST8 alpha-N-acetyl-neuraminide alpha-2,8-sialyltransferase 5
A_52_P109393	2.8265905	Nptx1	18164	neuronal pentraxin 1
A_52_P158959	2.51334	Slamf1	27218	signaling lymphocytic activation molecule family member 1
A_52_P550734	2.6387465	Kifc5b	16580	kinesin family member C5B
A_51_P152463	2.0277112	Adam26a	13525	a disintegrin and metallopeptidase domain 26A (testase 3)
A_52_P194326	2.5852036
A_52_P222052	3.440631	D830013H23Rik	319412	RIKEN cDNA D830013H23 gene
A_52_P244005	2.2451081	Cd80	12519	CD80 antigen
A_52_P819886	2.3580322
A_52_P284495	5.4718423	Ankrd33b	67434	ankyrin repeat domain 33B
A_51_P299475	2.8464832	Olfr63	258939	olfactory receptor 63
A_51_P122170	3.0398192	Rdh7	54150	retinol dehydrogenase 7
A_51_P423737	2.1178048	Spsb1	74646	splA/ryanodine receptor domain and SOCS box containing 1
A_52_P61752	2.819951	Tspan1	66805	tetraspanin 1
A_52_P16936	3.218416
A_52_P170735	2.2756608	Uck1	22245	uridine-cytidine kinase 1
A_52_P450276	2.1176584	Iglv1	16142	immunoglobulin lambda variable 1
A_52_P593151	2.2580676	4931406B18Rik	74054	RIKEN cDNA 4931406B18 gene
A_52_P563095	2.0324724
A_52_P659163	3.098613	Ugt2a1	94215	UDP glucuronosyltransferase 2 family, polypeptide A1
A_52_P567200	2.3799968	Ppef1	237178	protein phosphatase with EF hand calcium-binding domain 1
A_51_P505530	3.00216	Tnxb	81877	tenascin XB
A_52_P165773	2.2310402	Prmt8	381813	protein arginine N-methyltransferase 8
A_51_P401792	2.1309905	Ttn	22138	titin
A_52_P779892	2.5818436
A_52_P549815	2.6079853	Dsp	109620	desmoplakin
A_52_P537320	2.034633	Wdr76	241627	WD repeat domain 76
A_52_P527748	2.938712	Sema3a	20346	sema domain, immunoglobulin domain (Ig), short basic domain, secreted, (semaphorin) 3A
A_52_P867476	2.7914176
A_51_P209122	2.7580225	Agr2	23795	anterior gradient 2
A_51_P272876	3.5185359	Fam46a	212943	family with sequence similarity 46, member A
A_51_P352035	2.8803349
A_51_P332081	2.2114725	Cbl	12402	Casitas B-lineage lymphoma
A_52_P218930	3.073133	D830030K20Rik	320333	RIKEN cDNA D830030K20 gene
A_52_P151378	2.56367
A_51_P127695	2.4799545	Greb1	268527	gene regulated by estrogen in breast cancer protein
A_52_P280668	2.2339354	Gm5797	545013	predicted gene 5797
A_51_P370717	2.4095347	Gsc	14836	goosecoid homeobox
A_52_P335201	2.2687058	Epb4.1l2	13822	erythrocyte protein band 4.1-like 2
A_52_P85903	2.2966383	Chrna9	231252	cholinergic receptor, nicotinic, alpha polypeptide 9
A_51_P407594	2.1729875	Pdcd11	18572	programmed cell death 11
A_52_P419678	2.0921369	Serpina3f	238393	serine (or cysteine) peptidase inhibitor, clade A, member 3F
A_52_P101990	2.1431713	Hils1	54388	histone H1-like protein in spermatids 1
A_51_P311192	2.0332525
A_52_P558122	2.0181947	Dedd2	67379	death effector domain-containing DNA binding protein 2
A_52_P160328	2.4934077	Angpt1	11600	angiopoietin 1
A_52_P202322	3.2489157	Trdn	76757	triadin
A_51_P237040	2.130544	Nog	18121	noggin
A_52_P673396	2.3137355	1700001K23Rik	69319	RIKEN cDNA 1700001K23 gene
A_52_P551844	2.4938185	Ccdc69	52570	coiled-coil domain containing 69
A_52_P456392	2.4051938	Limch1	77569	LIM and calponin homology domains 1
A_52_P40363	2.325463	Grb10	14783	growth factor receptor bound protein 10
A_52_P529176	2.342806	Usp11	236733	ubiquitin specific peptidase 11
A_51_P450140	2.6137598	Cyp1a2	13077	cytochrome P450, family 1, subfamily a, polypeptide 2
A_52_P346244	2.6902635	Efcab1	66793	EF hand calcium binding domain 1
A_52_P278354	2.865276	Bmp7	12162	bone morphogenetic protein 7
A_52_P412656	2.0163598	Dync1h1	13424	dynein cytoplasmic 1 heavy chain 1
A_51_P435348	2.5631685	Tmem159	233806	transmembrane protein 159
A_51_P369392	2.236496	7330403C04Rik	100303735	RIKEN cDNA 7330403C04 gene
A_51_P343818	2.1882358	Pgbd5	209966	piggyBac transposable element derived 5
A_51_P457980	2.1585317
A_52_P366842	3.4068632	Dok1	13448	docking protein 1
A_51_P409220	2.0429854	Fgf13	14168	fibroblast growth factor 13
A_52_P112614	2.6933188	Ly6g6e	70274	lymphocyte antigen 6 complex, locus G6E
A_51_P442246	2.341972	Slc36a1os	74045	Slc36a1 opposite strand transcript
A_51_P352357	2.3625124	Ldhal6b	106557	lactate dehydrogenase A-like 6B
A_51_P383648	2.0762854	Pdzd2	68070	PDZ domain containing 2
A_52_P629919	2.268883	Gm2716	100040328	predicted gene 2716
A_51_P137419	2.1799545	Cst7	13011	cystatin F (leukocystatin)
A_51_P201884	3.0191739	Dsp	109620	desmoplakin
A_51_P108459	2.114302	Gpr65	14744	G-protein coupled receptor 65
A_51_P296755	2.409779	Fcgr1	14129	Fc receptor, IgG, high affinity I
A_52_P570679	2.332893	Scgb2b24	233090	secretoglobin, family 2B, member 24
A_51_P377641	2.6716084	2900092C05Rik	73090	RIKEN cDNA 2900092C05 gene
A_51_P106634	2.4648528	H2-M9	14997	histocompatibility 2, M region locus 9
A_52_P923486	3.8727949
A_52_P12877	2.4360085	Hspa8	15481	heat shock protein 8
A_51_P404193	2.2569447	Sp5	64406	trans-acting transcription factor 5
A_51_P444502	3.3194082
A_52_P640474	3.431106	Gnb4	14696	guanine nucleotide binding protein (G protein), beta 4
A_52_P188975	2.0287187	Pdcd6ip	18571	programmed cell death 6 interacting protein
A_51_P366513	2.7468061	Papss2	23972	3'-phosphoadenosine 5'-phosphosulfate synthase 2
A_52_P615192	2.0048513	Wnt16	93735	wingless-related MMTV integration site 16
A_52_P1091831	2.2338207
A_51_P488321	3.5555341	4922502D21Rik	381816	RIKEN cDNA 4922502D21 gene
A_52_P137104	5.007947	Prr15	78004	proline rich 15
A_52_P373439	2.0568671	C530025M09Rik	319470	RIKEN cDNA C530025M09 gene
A_51_P371034	2.127794	Rgs9	19739	regulator of G-protein signaling 9
A_51_P255853	2.6437159	Tal1	21349	T cell acute lymphocytic leukemia 1
A_51_P324228	2.6478279	Satb1	20230	special AT-rich sequence binding protein 1
A_52_P354617	2.042598	Lgi1	56839	leucine-rich repeat LGI family, member 1
A_51_P427401	2.391834	4932442L08Rik	631145	RIKEN cDNA 4932442L08 gene
A_51_P142738	3.2402246	4930435E12Rik	74663	RIKEN cDNA 4930435E12 gene
A_51_P433765	3.040563	Dnah3	381917	dynein, axonemal, heavy chain 3
A_52_P438467	2.1296344
A_51_P477458	2.0166643	Grid2	14804	glutamate receptor, ionotropic, delta 2
A_52_P86561	2.1904297	Pex12	103737	peroxisomal biogenesis factor 12
A_51_P268496	3.1656713	Slc24a3	94249	solute carrier family 24 (sodium/potassium/calcium exchanger), member 3
A_51_P500882	2.056763	Ncr1	17086	natural cytotoxicity triggering receptor 1
A_51_P347494	2.4467442	Sdc3	20970	syndecan 3
A_52_P1195722	3.7399852	Skint1	639781	selection and upkeep of intraepithelial T cells 1
A_52_P571896	3.3021245	Svopl	320590	SV2 related protein homolog (rat)-like
A_52_P778866	2.0274465
A_51_P308844	2.4271014	Nrn1	68404	neuritin 1
A_51_P421303	2.4852102	Caly	68566	calcyon neuron-specific vesicular protein
A_52_P930960	2.0439866
A_52_P69867	2.4025166	Ppme1	72590	protein phosphatase methylesterase 1
A_51_P403122	2.446493
A_52_P433119	2.1212916
A_51_P447595	2.850946	Scube1	64706	signal peptide, CUB domain, EGF-like 1
A_51_P160083	2.5876877	1500035N22Rik	70258	RIKEN cDNA 1500035N22 gene
A_52_P336839	2.1163743	Acsm2	233799	acyl-CoA synthetase medium-chain family member 2
A_52_P625527	2.8262305	Aqp4	11829	aquaporin 4
A_52_P410334	2.3857827
A_52_P99744	2.7416213	A730021G18Rik	319782	RIKEN cDNA A730021G18 gene
A_52_P201833	2.1769583	Col19a1	12823	collagen, type XIX, alpha 1
A_51_P486174	2.7606466	Sva	20939	seminal vesicle antigen
A_52_P230947	2.0834262	U2af1	108121	U2 small nuclear ribonucleoprotein auxiliary factor (U2AF) 1
A_52_P151839	2.135197	Ttc26	264134	tetratricopeptide repeat domain 26
A_51_P268754	2.8138788	Themis	210757	thymocyte selection associated
A_51_P186374	4.8174653	Grap2	17444	GRB2-related adaptor protein 2
A_51_P303061	2.4830232	Adcy8	11514	adenylate cyclase 8
A_51_P517608	2.6314824	2010106E10Rik	67715	RIKEN cDNA 2010106E10 gene
A_51_P493771	2.338325	8030462N17Rik	212163	RIKEN cDNA 8030462N17 gene
A_52_P336142	2.27992	Abcg2	26357	ATP-binding cassette, sub-family G (WHITE), member 2
A_51_P519364	3.7584732	Fam83f	213956	family with sequence similarity 83, member F
A_51_P302327	2.3132236	Lgals7	16858	lectin, galactose binding, soluble 7
A_51_P384248	2.0241368	Smg1	233789	SMG1 homolog, phosphatidylinositol 3-kinase-related kinase (C. elegans)
A_52_P66561	2.070645	Far2	330450	fatty acyl CoA reductase 2
A_52_P142827	2.1908405	Slc38a11	320106	solute carrier family 38, member 11
A_51_P407028	2.5479279	Car4	12351	carbonic anhydrase 4
A_51_P393355	2.2310688	Pikfyve	18711	phosphoinositide kinase, FYVE finger containing
A_51_P199993	2.4821117	Gucy1a3	60596	guanylate cyclase 1, soluble, alpha 3
A_51_P402443	2.0510716	Olfr836	258557	olfactory receptor 836
A_51_P145511	3.054604	Prl2a1	56635	prolactin family 2, subfamily a, member 1
A_52_P652671	2.2652755	Hps1	192236	Hermansky-Pudlak syndrome 1 homolog (human)
A_51_P507051	2.5697033	Bhlhe22	59058	basic helix-loop-helix family, member e22
A_52_P9716	2.0143762	Aph1a	226548	anterior pharynx defective 1a homolog (C. elegans)
A_52_P778391	3.0100002	1700042D02Rik	73337	RIKEN cDNA 1700042D02 gene
A_52_P819555	2.5182853
A_52_P448936	2.1870959	Ppp2r5e	26932	protein phosphatase 2, regulatory subunit B (B56), epsilon isoform
A_52_P312338	2.0095787
A_52_P504787	2.2543633	Epha7	13841	Eph receptor A7
A_51_P300986	2.1264677
A_52_P298071	2.2481732	Wibg	78428	within bgcn homolog (Drosophila)
A_52_P246255	2.275406	Cyp2a4	13086	cytochrome P450, family 2, subfamily a, polypeptide 4
A_52_P1021909	2.4471385
A_52_P715341	2.087521
A_52_P565847	2.3924012	AU018091	245128	expressed sequence AU018091
A_52_P166888	2.07784	Ccdc64	75665	coiled-coil domain containing 64
A_52_P842837	2.7902997	C030007I01Rik	77333	RIKEN cDNA C030007I01 gene
A_52_P301591	2.2754824	Map3k10	269881	mitogen-activated protein kinase kinase kinase 10
A_52_P956057	2.2100353
A_52_P249385	2.083002	Wwp2	66894	WW domain containing E3 ubiquitin protein ligase 2
A_51_P321600	2.6201482	Ccdc30	73332	coiled-coil domain containing 30
A_51_P100298	2.0221748	Stx3	20908	syntaxin 3
A_52_P223828	2.0215106	6430548M08Rik	234797	RIKEN cDNA 6430548M08 gene
A_51_P297915	2.6780658	Lrrc19	100061	leucine rich repeat containing 19
A_52_P10063	3.8686717	Raet1e	379043	retinoic acid early transcript 1E
A_52_P681332	2.589724	Panx1	55991	pannexin 1
A_52_P795382	2.905936
A_52_P121800	2.314935	Cyp2j11	100066	cytochrome P450, family 2, subfamily j, polypeptide 11
A_52_P1028593	2.2443264
A_51_P269029	2.1392503	Rnf112	22671	ring finger protein 112
A_52_P6490	2.1893544	Insr	16337	insulin receptor
A_51_P210403	2.0300665	Ppp1r2-ps9	67395	protein phosphatase 1, regulatory (inhibitor) subunit 2, pseudogene 9
A_51_P207940	2.1561222	Tmem117	320709	transmembrane protein 117
A_52_P533270	2.2572112	2310005G13Rik	69457	RIKEN cDNA 2310005G13 gene
A_52_P616492	2.1470952	Ccdc73	211936	coiled-coil domain containing 73
A_51_P172131	2.2742043	Lurap1l	52829	leucine rich adaptor protein 1-like
A_52_P77733	2.030195	Sprtn	244666	SprT-like N-terminal domain
A_51_P507407	2.1377296	Tatdn3	68972	TatD DNase domain containing 3
A_52_P76236	2.691841
A_51_P486629	2.479542	1700129C05Rik	67932	RIKEN cDNA 1700129C05 gene
A_52_P651298	2.006272	Cdk2	12566	cyclin-dependent kinase 2
A_52_P470046	2.0624037	Cyfip2	76884	cytoplasmic FMR1 interacting protein 2
A_51_P228777	2.0491884	Fcho1	74015	FCH domain only 1
A_52_P980022	2.3692427
A_52_P535333	3.3995655
A_51_P158678	2.1756544	Fam181b	58238	family with sequence similarity 181, member B
A_51_P514449	2.470851	Nr5a2	26424	nuclear receptor subfamily 5, group A, member 2
A_52_P178718	2.2171395	AY761184	382000	cDNA sequence AY761184
A_51_P308148	2.0583727	Vmn1r78	171242	vomeronasal 1 receptor 78
A_52_P60693	2.9374785
A_51_P412249	2.0344596
A_52_P275769	2.1618576	Ccdc158	320696	coiled-coil domain containing 158
A_52_P1013105	2.253798
A_51_P140710	2.7120216	Ccl3	20302	chemokine (C-C motif) ligand 3
A_52_P356073	2.323741	D5Ertd577e	320549	DNA segment, Chr 5, ERATO Doi 577, expressed
A_52_P139316	2.3216836	Mup8	100041687	major urinary protein 8
A_52_P333071	2.0312364	Uba6	231380	ubiquitin-like modifier activating enzyme 6
A_52_P67007	2.7454097	1700025H01Rik	75531	RIKEN cDNA 1700025H01 gene
A_51_P186081	2.1328506	1700042D18Rik	67324	RIKEN cDNA 1700042D18 gene
A_52_P605455	2.5864387	Eef2	13629	eukaryotic translation elongation factor 2
A_51_P297900	2.0970538	Syt1	20979	synaptotagmin I
A_51_P450007	2.258078	5730585A16Rik	77096	RIKEN cDNA 5730585A16 gene
A_52_P510527	2.901322	Pirt	193003	phosphoinositide-interacting regulator of transient receptor potential channels
A_51_P354382	2.821259
A_51_P479158	3.680088	Iqch	78250	IQ motif containing H
A_52_P1480	2.0029404	Tom1	21968	target of myb1 homolog (chicken)
A_51_P143341	2.1959114	Cyb5rl	230582	cytochrome b5 reductase-like
A_52_P464998	2.5991786	D830013E24Rik	319510	RIKEN cDNA D830013E24 gene
A_52_P1108451	2.1425977
A_52_P377111	2.1180294
A_52_P713932	2.2236238	2600014E21Rik	72134	RIKEN cDNA 2600014E21 gene
A_51_P408625	2.107212
A_52_P771362	3.2431753
A_51_P302993	2.376784
A_52_P615348	2.042671	Igsf5	72058	immunoglobulin superfamily, member 5
A_52_P328597	2.110432	D3Ertd254e	241944	DNA segment, Chr 3, ERATO Doi 254, expressed
A_51_P473912	2.2335052	Tchhl1	71325	trichohyalin-like 1
A_52_P85372	2.8852017	Chrm1	12669	cholinergic receptor, muscarinic 1, CNS
A_52_P519783	2.1304576	Ltk	17005	leukocyte tyrosine kinase
A_51_P106735	2.058002
A_51_P392740	2.0853586	Spata18	73472	spermatogenesis associated 18
A_52_P157837	2.073941
A_52_P66107	2.1090508	Wsb1	78889	WD repeat and SOCS box-containing 1
A_52_P321342	3.0746076	Dock8	76088	dedicator of cytokinesis 8
A_51_P377094	5.0563684	Col1a1	12842	collagen, type I, alpha 1
A_52_P817257	2.4657576	Smim22	432995	small integral membrane protein 22
A_52_P176999	2.2013764	Klhl31	244923	kelch-like 31
A_52_P418014	2.6977034	Akt1	11651	thymoma viral proto-oncogene 1
A_52_P115565	2.2421277	4930500J02Rik	74959	RIKEN cDNA 4930500J02 gene
A_52_P670005	2.8748076	Strip2	320609	striatin interacting protein 2
A_52_P247943	2.1118536	Parl	381038	presenilin associated, rhomboid-like
A_51_P301394	2.4366114	Gspt2	14853	G1 to S phase transition 2
A_51_P259983	2.0728312
A_52_P188746	2.4880242	Tmem67	329795	transmembrane protein 67
A_52_P980129	2.0052748
A_52_P676403	2.2618296	Cxcl11	56066	chemokine (C-X-C motif) ligand 11
A_52_P90771	3.112491	Inpp5b	16330	inositol polyphosphate-5-phosphatase B
A_52_P340094	3.0576828	Klri2	320407	killer cell lectin-like receptor family I member 2
A_52_P7593	2.1168587	Tnfrsf19	29820	tumor necrosis factor receptor superfamily, member 19
A_52_P604149	2.4907978	Adamts6	108154	a disintegrin-like and metallopeptidase (reprolysin type) with thrombospondin type 1 motif, 6
A_52_P224348	2.51098	Kctd12b	207474	potassium channel tetramerisation domain containing 12b
A_51_P258322	2.0517442	Zfp956	101197	zinc finger protein 956
A_52_P963805	2.0865722
A_52_P939831	2.4466903
A_52_P1116291	2.46399	Sh3yl1	24057	Sh3 domain YSC-like 1
A_51_P416647	2.5643828	Egfbp2	13647	epidermal growth factor binding protein type B
A_52_P715128	3.6939898
A_52_P200500	2.0166337	Asic4	241118	acid-sensing (proton-gated) ion channel family member 4
A_52_P883714	2.076342
A_52_P366005	2.4835322	Clec3a	403395	C-type lectin domain family 3, member a
A_51_P259778	2.2176652	Sdr16c6	242286	short chain dehydrogenase/reductase family 16C, member 6
A_52_P551544	2.1707096	Grm7	108073	glutamate receptor, metabotropic 7
A_51_P294251	2.4392483	9330184L24Rik	402729	RIKEN cDNA 9330184L24 gene
A_52_P674259	2.529043	Kif17	16559	kinesin family member 17
A_51_P224555	2.1997392	Fhad1	329977	forkhead-associated (FHA) phosphopeptide binding domain 1
A_51_P388454	2.0260243	Dsg1b	225256	desmoglein 1 beta
A_51_P197883	2.5682878	Exo5	73172	exonuclease 5
A_51_P474709	2.0492773	Mcu	215999	mitochondrial calcium uniporter
A_52_P146918	2.3931267	Fxr2	23879	fragile X mental retardation, autosomal homolog 2
A_51_P199199	2.42828	Pik3ap1	83490	phosphoinositide-3-kinase adaptor protein 1
A_51_P381540	2.465032
A_52_P868199	2.7311325
A_52_P891875	2.2837877	Vps16	80743	vacuolar protein sorting 16 (yeast)
A_51_P200622	2.339025	Bloc1s2	73689	biogenesis of lysosome-related organelles complex-1, subunit 2
A_51_P290065	2.3348727	Gap43	14432	growth associated protein 43
A_52_P387056	2.3924446	Creg2	263764	cellular repressor of E1A-stimulated genes 2
A_52_P533161	2.7856448	Ablim1	226251	actin-binding LIM protein 1
A_51_P141970	2.036639	Mum1	68114	melanoma associated antigen (mutated) 1
A_51_P327768	2.0988808	Spata33	320869	spermatogenesis associated 33
A_52_P266202	2.2290218	Uty	22290	ubiquitously transcribed tetratricopeptide repeat gene, Y chromosome
A_52_P570330	2.0558372	Kcnh3	16512	potassium voltage-gated channel, subfamily H (eag-related), member 3
A_52_P478174	2.2512183	Sv2b	64176	synaptic vesicle glycoprotein 2 b
A_52_P40244	2.2939515	Lce3f	69520	late cornified envelope 3F
A_51_P386983	2.5135224	Tnni3	21954	troponin I, cardiac 3
A_52_P264669	2.079063	Pdlim2	213019	PDZ and LIM domain 2
A_52_P11456	2.4982483
A_51_P438283	2.762651	Il1a	16175	interleukin 1 alpha
A_51_P417507	2.839213	Gabra2	14395	gamma-aminobutyric acid (GABA) A receptor, subunit alpha 2
A_51_P457975	2.363102	Myrf	225908	myelin regulatory factor
A_52_P636987	2.239168	Gm362	637093	predicted gene 362
A_51_P226711	2.0495808	Ptf1a	19213	pancreas specific transcription factor, 1a
A_52_P139027	2.4471488	Igh-VJ558	16061	immunoglobulin heavy chain (J558 family)
A_51_P111434	2.3032074
A_51_P230025	2.0060608	Zfp458	238690	zinc finger protein 458
A_52_P481319	2.3708355
A_51_P207098	2.7905695	Strm	100504617	striamin
A_52_P426316	2.2892892	Gm732	213450	predicted gene 732
A_52_P455370	2.1834662	A2m	232345	alpha-2-macroglobulin
A_51_P208781	2.6418326	Cldn17	239931	claudin 17
A_52_P260114	2.116033	Casp7	12369	caspase 7
A_51_P208922	2.4785137	Stc2	20856	stanniocalcin 2
A_51_P472574	2.0556476	Fgf22	67112	fibroblast growth factor 22
A_52_P309389	2.5520074	Cfh	12628	complement component factor h
A_51_P144180	2.6403508	Ifnb1	15977	interferon beta 1, fibroblast
A_51_P181097	2.9872537	Pfas	237823	phosphoribosylformylglycinamidine synthase (FGAR amidotransferase)
A_52_P346252	2.5495555
A_52_P1343	2.0762966
A_52_P21595	2.0692062	Rab38	72433	RAB38, member of RAS oncogene family
A_51_P435524	2.347995	1700015P03Rik	72223	RIKEN cDNA 1700015P03 gene
A_52_P80423	2.5765662	Dnajb7	57755	DnaJ (Hsp40) homolog, subfamily B, member 7
A_51_P304397	2.0063617	Cpm	70574	carboxypeptidase M
A_52_P398279	2.0534098	Ddx26b	236790	DEAD/H (Asp-Glu-Ala-Asp/His) box polypeptide 26B
A_52_P339054	2.2770865	Nap1l4	17955	nucleosome assembly protein 1-like 4
A_52_P256584	2.1703777	Bscl2	14705	Bernardinelli-Seip congenital lipodystrophy 2 homolog (human)
A_52_P739149	2.0928051
A_52_P249611	2.1551383	Rnf25	57751	ring finger protein 25
A_51_P426214	2.1004589	Src	20779	Rous sarcoma oncogene
A_52_P443103	2.1322403	Hcn1	15165	hyperpolarization-activated, cyclic nucleotide-gated K+ 1
A_52_P70796	2.3179626	Cxcr5	12145	chemokine (C-X-C motif) receptor 5
A_52_P205031	3.905677	Gnao1	14681	guanine nucleotide binding protein, alpha O
A_52_P464683	2.0101318	4930525G20Rik	320163	RIKEN cDNA 4930525G20 gene
A_52_P617076	2.5146494	Galntl6	270049	UDP-N-acetyl-alpha-D-galactosamine:polypeptide N-acetylgalactosaminyltransferase-like 6
A_52_P259174	2.1499717
A_52_P602559	2.4426835	Hmox1	15368	heme oxygenase (decycling) 1
A_51_P273449	2.0915368	Gnaz	14687	guanine nucleotide binding protein, alpha z subunit
A_52_P95517	2.7965212	Cyp2a22	233005	cytochrome P450, family 2, subfamily a, polypeptide 22
A_51_P511112	2.1025348	H1f0	14958	H1 histone family, member 0
A_52_P261086	2.0530908	Tmem140	68487	transmembrane protein 140
A_52_P419539	2.3808682	Trav12n-2	100043270	T cell receptor alpha variable 12N-2
A_52_P519943	2.13612	Fads6	328035	fatty acid desaturase domain family, member 6
A_52_P429909	4.767454	Dynll2	68097	dynein light chain LC8-type 2
A_52_P121045	2.0131412	Tmed7	66676	transmembrane emp24 protein transport domain containing 7
A_52_P62637	2.2130551
A_52_P594177	2.1962035	Piezo1	234839	piezo-type mechanosensitive ion channel component 1
A_51_P306387	2.2583137	Klra4	16635	killer cell lectin-like receptor, subfamily A, member 4
A_51_P521090	2.3784182
A_52_P594352	5.666836
A_52_P50512	2.0476835	Psmd13	23997	proteasome (prosome, macropain) 26S subunit, non-ATPase, 13

## Sheet: Supplementary Table S3
ProbeName	Fold change	GeneSymbol	Entrez_Gene_ID	GeneName
A_52_P819156	-2.0867808	Gm12689	100137011	predicted gene 12689
A_52_P299964	-2.4334528	Maml2	270118	mastermind like 2 (Drosophila)
A_52_P1012592	-4.032478
A_52_P308507	-2.1195707	Chd6	71389	chromodomain helicase DNA binding protein 6
A_51_P306287	-2.1055264	Slc30a2	230810	solute carrier family 30 (zinc transporter), member 2
A_51_P219849	-3.133399	Alg13	67574	asparagine-linked glycosylation 13
A_52_P818995	-2.1215985
A_52_P49261	-2.4223242
A_51_P457372	-2.12942
A_51_P134801	-2.3875206	Ankrd12	106585	ankyrin repeat domain 12
A_51_P406913	-3.352918	Gdf7	238057	growth differentiation factor 7
A_51_P311659	-2.254615	Gnaq	14682	guanine nucleotide binding protein, alpha q polypeptide
A_51_P487518	-2.2081344	Casp12	12364	caspase 12
A_52_P1002614	-2.2521393
A_52_P1052048	-2.7949545
A_51_P367550	-2.3594613	1700110M21Rik	76627	RIKEN cDNA 1700110M21 gene
A_52_P561978	-2.3491406
A_51_P460459	-3.524028	Dfna5	54722	deafness, autosomal dominant 5 (human)
A_52_P908943	-2.3047721	LOC101056177	101056177	uncharacterized LOC101056177
A_51_P491459	-2.7570746
A_51_P438002	-3.0580616	Nmb	68039	neuromedin B
A_52_P1108539	-2.774909
A_52_P419879	-2.362074
A_52_P576818	-2.2168672
A_51_P441103	-2.4312959
A_52_P360351	-4.7987623	C920008N22Rik	319366	RIKEN cDNA C920008N22 gene
A_52_P599680	-2.5810432	Sfxn4	94281	sideroflexin 4
A_51_P113769	-2.0652356
A_52_P1196573	-2.0264847
A_52_P596360	-2.1559591
A_51_P212440	-2.070654	Eri3	140546	exoribonuclease 3
A_52_P232346	-3.2433913
A_51_P276787	-2.3860455	1700018B24Rik	66332	enhancer of rudimentary homolog pseudogene
A_52_P690624	-2.4704	5830432F11Rik	76029	RIKEN cDNA 5830432F11 gene
A_52_P147089	-2.2763147	BC038268	100038756	cDNA sequence BC038268
A_52_P341504	-2.708785	Klhl20	226541	kelch-like 20
A_52_P86165	-3.6863928	9430040K09Rik	77280	RIKEN cDNA 9430040K09 gene
A_52_P699118	-2.8850386
A_52_P374825	-3.716391	Dusp16	70686	dual specificity phosphatase 16
A_52_P236671	-2.2606936	Nbea	26422	neurobeachin
A_52_P26357	-2.0797083	Arhgef7	54126	Rho guanine nucleotide exchange factor (GEF7)
A_51_P275147	-2.033643
A_52_P627256	-2.588006	E330037G11Rik	102220	RIKEN cDNA E330037G11 gene
A_52_P346860	-2.0667965	Rttn	246102	rotatin
A_52_P478745	-2.157747	Paxbp1	67367	PAX3 and PAX7 binding protein 1
A_52_P290325	-2.1630108	Depdc1a	76131	DEP domain containing 1a
A_51_P183812	-2.771759	Slfn4	20558	schlafen 4
A_51_P172355	-2.886425	5530601H04Rik	71445	RIKEN cDNA 5530601H04 gene
A_51_P201132	-2.0563707
A_51_P133936	-2.0455751	Kitl	17311	kit ligand
A_51_P337935	-2.010686	Slc7a15	328059	solute carrier family 7 (cationic amino acid transporter, y+ system), member 15
A_51_P398596	-2.1173701	Tnrc6b	213988	trinucleotide repeat containing 6b
A_52_P1053015	-2.3777127
A_52_P528996	-2.4324427	Mxd4	17122	Max dimerization protein 4
A_52_P859123	-3.4316134
A_51_P313093	-2.07262	Ick	56542	intestinal cell kinase
A_51_P497502	-2.0192065
A_52_P261625	-2.4918234
A_52_P590868	-2.1131268	Timm23	53600	translocase of inner mitochondrial membrane 23
A_51_P484221	-2.1789916	C230083P08Rik	320002	RIKEN cDNA C230083P08 gene
A_52_P499523	-2.8689506	Scfd1	76983	Sec1 family domain containing 1
A_52_P10037	-2.090811	Asf1a	66403	ASF1 anti-silencing function 1 homolog A (S. cerevisiae)
A_52_P38042	-2.044676	Sh3rf1	59009	SH3 domain containing ring finger 1
A_51_P220718	-2.3007782
A_52_P478311	-2.1100423
A_52_P358138	-2.1789098
A_51_P130095	-2.0632346	Fcgr2b	14130	Fc receptor, IgG, low affinity IIb
A_52_P163105	-2.2230318	D930030O05Rik	320387	RIKEN cDNA D930030O05 gene
A_51_P288986	-2.299831	Olfr391-ps	258236	olfactory receptor 391, pseudogene
A_52_P646112	-2.295473	Rps13	68052	ribosomal protein S13
A_52_P1165687	-2.050533
A_52_P300856	-2.1763763	D130020L05Rik	319760	RIKEN cDNA D130020L05 gene
A_51_P104197	-2.102575	Glb1l2	244757	galactosidase, beta 1-like 2
A_52_P231217	-2.311452	Nfia	18027	nuclear factor I/A
A_52_P266562	-2.1651967	Camk2d	108058	calcium/calmodulin-dependent protein kinase II, delta
A_52_P46504	-2.3731985	Hdac2	15182	histone deacetylase 2
A_52_P16822	-3.018281	A330078L11Rik	320008	RIKEN cDNA A330078L11 gene
A_52_P739793	-2.229097
A_52_P1082736	-2.0931664	Gm4532	100043580	predicted gene 4532
A_51_P224493	-3.2199187
A_51_P360421	-2.5321136
A_52_P354947	-2.5685096	E230008O15Rik	319862	RIKEN cDNA E230008O15 gene
A_52_P477309	-2.580577
A_51_P265348	-2.4015925	Ldb3	24131	LIM domain binding 3
A_52_P1171614	-2.2195892	Pou4f1	18996	POU domain, class 4, transcription factor 1
A_51_P314363	-2.1028872
A_52_P1068094	-3.0418162
A_52_P662562	-2.8311956
A_51_P477540	-2.368934	Lyzl4	69032	lysozyme-like 4
A_52_P604022	-3.6291263	Foxp1	108655	forkhead box P1
A_52_P932831	-2.081945
A_52_P731758	-2.0269494
A_51_P494409	-2.4389052	Zfp758	224598	zinc finger protein 758
A_51_P382467	-2.7517822	8430428J23Rik	74534	RIKEN cDNA 8430428J23 gene
A_52_P370203	-2.1968982	Jarid2	16468	jumonji, AT rich interactive domain 2
A_52_P341204	-3.5327303	2610307P16Rik	72518	RIKEN cDNA 2610307P16 gene
A_52_P75220	-2.684007	3110021N24Rik	73133	RIKEN cDNA 3110021N24 gene
A_51_P513439	-2.1593168	D630003M21Rik	228846	RIKEN cDNA D630003M21 gene
A_51_P213077	-2.1446378	Adamtsl3	269959	ADAMTS-like 3
A_51_P291361	-2.0330715	Osm	18413	oncostatin M
A_52_P330822	-2.678509	Chml	12663	choroideremia-like
A_51_P268748	-3.4093416	2610203C20Rik	100042464	RIKEN cDNA 2610203C20 gene
A_51_P255456	-2.0470757	Cyp1b1	13078	cytochrome P450, family 1, subfamily b, polypeptide 1
A_52_P1152469	-2.2793183
A_51_P426373	-2.9312413	Cib4	73259	calcium and integrin binding family member 4
A_51_P386003	-2.6248696
A_51_P254855	-2.4575589	Ptgs2	19225	prostaglandin-endoperoxide synthase 2
A_52_P465669	-2.1384058
A_52_P385006	-3.399592	Ccdc155	384619	coiled-coil domain containing 155
A_52_P357255	-3.8137915	Pkd2l2	53871	polycystic kidney disease 2-like 2
A_51_P459465	-3.0837984	Kidins220	77480	kinase D-interacting substrate 220
A_51_P265173	-3.1814313	Fbxo27	233040	F-box protein 27
A_52_P175304	-2.0197628	Yme1l1	27377	YME1-like 1 (S. cerevisiae)
A_52_P663132	-3.1613114	Cisd2	67006	CDGSH iron sulfur domain 2
A_52_P191681	-3.5488758	Sec1	56546	secretory blood group 1
A_51_P414188	-2.0645325
A_52_P32561	-2.8253582	A030010E16Rik	320039	RIKEN cDNA A030010E16 gene
A_52_P1059923	-2.4585712
A_51_P365008	-2.1985564	Tns1	21961	tensin 1
A_52_P556804	-2.0074573
A_51_P119841	-2.7773845
A_52_P900176	-2.4727483
A_52_P707923	-2.4101639
A_52_P1077539	-2.4351053
A_51_P394244	-3.3714626	Rapgefl1	268480	Rap guanine nucleotide exchange factor (GEF)-like 1
A_51_P208701	-3.1284742	Mterfd2	69821	MTERF domain containing 2
A_52_P156502	-2.4678364	Top2a	21973	topoisomerase (DNA) II alpha
A_52_P883283	-2.5397122
A_52_P273438	-2.2756217
A_51_P322531	-2.2298906	Trip4	56404	thyroid hormone receptor interactor 4
A_52_P834112	-3.3072088	3021401N23Rik	70680	RIKEN cDNA 3021401N23 gene
A_52_P478790	-2.204798
A_51_P394814	-2.4795654	Svep1	64817	sushi, von Willebrand factor type A, EGF and pentraxin domain containing 1
A_51_P170405	-3.145261	Il13ra2	16165	interleukin 13 receptor, alpha 2
A_52_P54666	-2.0406678	Map2	17756	microtubule-associated protein 2
A_52_P691458	-2.865634
A_51_P276452	-2.8835425	Tigd5	105734	tigger transposable element derived 5
A_52_P110590	-2.1101532	9630033C03Rik	320324	RIKEN cDNA 9630033C03 gene
A_51_P311699	-2.2102318	Serpine3	319433	serpin peptidase inhibitor, clade E (nexin, plasminogen activator inhibitor type 1), member 3
A_52_P1415	-2.0039508
A_52_P409778	-2.5610294	Wdfy3	72145	WD repeat and FYVE domain containing 3
A_51_P364578	-3.4427974	9930021J03Rik	240613	RIKEN cDNA 9930021J03 gene
A_51_P119401	-2.3687828	Tug1	544752	taurine upregulated gene 1
A_52_P1084127	-2.904508
A_52_P535484	-2.0106816	Gvin1	74558	GTPase, very large interferon inducible 1
A_52_P325527	-3.1512535	Edil3	13612	EGF-like repeats and discoidin I-like domains 3
A_52_P593611	-2.5641687	Fam188a	66960	family with sequence similarity 188, member A
A_51_P289828	-2.858588	Ccdc138	76138	coiled-coil domain containing 138
A_52_P8863	-2.3048651
A_51_P355753	-4.7530346	Hic1	15248	hypermethylated in cancer 1
A_52_P11351	-2.9566739
A_51_P322170	-2.2535393	Prl3d1	18775	prolactin family 3, subfamily d, member 1
A_51_P503922	-2.1025007	Rcvrn	19674	recoverin
A_52_P914995	-3.2740839	9430012M22Rik	77244	RIKEN cDNA 9430012M22 gene
A_51_P366207	-2.4789696	Nap1l2	17954	nucleosome assembly protein 1-like 2
A_51_P407528	-2.668694
A_52_P394175	-2.628879
A_52_P618132	-2.4342403	Manea	242362	mannosidase, endo-alpha
A_52_P663267	-2.4759755
A_52_P171019	-2.3086195	Man1a	17155	mannosidase 1, alpha
A_51_P151835	-3.229468	Tmtc3	237500	transmembrane and tetratricopeptide repeat containing 3
A_51_P406281	-2.009159	Zfp579	68490	zinc finger protein 579
A_51_P335591	-2.616523	Ryr3	20192	ryanodine receptor 3
A_52_P1044696	-4.465634
A_52_P222110	-2.4838817	Tmpo	21917	thymopoietin
A_52_P158431	-2.1773047	Tshz2	228911	teashirt zinc finger family member 2
A_52_P607103	-2.1119592	Pik3r3	18710	phosphatidylinositol 3 kinase, regulatory subunit, polypeptide 3 (p55)
A_52_P482071	-2.85138	9330133O14Rik	100689703	RIKEN cDNA 9330133O14 gene
A_51_P197146	-2.5105064	5830400J07Rik	74739	RIKEN cDNA 5830400J07 gene
A_51_P129260	-2.6754625
A_52_P360076	-2.7111595	E330013P08Rik	320870	RIKEN cDNA E330013P08 gene
A_52_P469873	-3.3389206	Mtpap	67440	mitochondrial poly(A) polymerase
A_52_P73028	-2.8693373	Map4k5	399510	mitogen-activated protein kinase kinase kinase kinase 5
A_51_P217906	-2.0916994	Ctse	13034	cathepsin E
A_51_P371001	-2.0500822	Tm4sf4	229302	transmembrane 4 superfamily member 4
A_52_P78922	-2.0009117	Ythdc2	240255	YTH domain containing 2
A_51_P451450	-2.1173687	Pvt1	19296	plasmacytoma variant translocation 1
A_52_P1115594	-2.634351
A_52_P488540	-2.3196547
A_52_P303841	-2.040515	Gm5296	384261	predicted gene 5296
A_51_P116687	-2.2359524	1700010I14Rik	66931	RIKEN cDNA 1700010I14 gene
A_52_P245316	-2.4797604	Myrf	225908	myelin regulatory factor
A_52_P771436	-2.811991
A_51_P136848	-2.2606
A_52_P62444	-2.951601	Syn2	20965	synapsin II
A_52_P1196354	-3.439216
A_51_P442284	-3.6396828	Dnajc12	30045	DnaJ (Hsp40) homolog, subfamily C, member 12
A_51_P423157	-2.3886516	R3hdm1	226412	R3H domain containing 1
A_52_P22896	-2.3459108	Rin3	217835	Ras and Rab interactor 3
A_52_P1180506	-2.0498507	Gm2137	100039284	predicted gene 2137
A_51_P496122	-2.2180116
A_51_P305350	-2.3642633
A_52_P675052	-2.0022845	Golgb1	224139	golgi autoantigen, golgin subfamily b, macrogolgin 1
A_51_P140966	-2.1677754	Olfr1359	258067	olfactory receptor 1359
A_52_P413530	-2.364436	Zcchc7	319885	zinc finger, CCHC domain containing 7
A_52_P219853	-2.306674	Olfr1381	258461	olfactory receptor 1381
A_51_P346523	-3.3527238	Zcchc7	319885	zinc finger, CCHC domain containing 7
A_52_P628355	-2.3869574	Tctn3	67590	tectonic family member 3
A_51_P116665	-3.2198396	LOC101056094	101056094	cadherin-11-like
A_52_P971498	-2.5071466
A_52_P240170	-2.2113824	Adcy1	432530	adenylate cyclase 1
A_52_P755259	-2.4564939
A_51_P180307	-2.751273
A_51_P419750	-2.2179623	BB085087	99939	expressed sequence BB085087
A_51_P215863	-3.3415315
A_52_P8286	-2.0152414	2810428J06Rik	67058	RIKEN cDNA 2810428J06 gene
A_52_P350012	-5.011596	Megf9	230316	multiple EGF-like-domains 9
A_51_P136289	-2.2442403	Ms4a4b	60361	membrane-spanning 4-domains, subfamily A, member 4B
A_52_P641132	-2.3762023	Sox14	20669	SRY-box containing gene 14
A_52_P715191	-2.0922668
A_52_P656448	-3.612473	Ssxb3	278174	synovial sarcoma, X member B, breakpoint 3
A_52_P321584	-2.5058556
A_52_P1172895	-2.691865	C230094B09Rik	319347	RIKEN cDNA C230094B09 gene
A_51_P333020	-2.3754277	Srcap	100043597	Snf2-related CREBBP activator protein
A_52_P153804	-3.2323904	2810055G20Rik	77994	RIKEN cDNA 2810055G20 gene
A_52_P524540	-2.401304
A_52_P1123994	-3.1649299	Thoc2	331401	THO complex 2
A_51_P160413	-2.3656147	Yod1	226418	YOD1 OTU deubiquitinating enzyme 1 homologue (S. cerevisiae)
A_52_P32636	-2.8349957	LOC101056382	101056382	uncharacterized LOC101056382
A_52_P811196	-2.3774476
A_52_P657133	-2.5340748
A_52_P1172382	-2.5262127	Gm9951	791287	predicted gene 9951
A_52_P671107	-3.0470166
A_51_P442366	-2.2507286	Diap2	54004	diaphanous homolog 2 (Drosophila)
A_52_P289164	-2.0764763	D930046H04Rik	319522	RIKEN cDNA D930046H04 gene
A_51_P395309	-2.1545622
A_52_P225514	-2.4998035	Eps15	13858	epidermal growth factor receptor pathway substrate 15
A_52_P445919	-2.159111	Ubn2	320538	ubinuclein 2
A_51_P248484	-2.205821	Nipsnap3a	73398	nipsnap homolog 3A (C. elegans)
A_52_P559748	-2.6806235	Hist1h2bq	665596	histone cluster 1, H2bq
A_52_P1068292	-2.7873685
A_51_P359153	-3.3776255
A_52_P665965	-2.9783213	Krit1	79264	KRIT1, ankyrin repeat containing
A_52_P123772	-2.6920936
A_51_P267338	-2.7853904	Erbb2ip	59079	Erbb2 interacting protein
A_52_P42194	-3.820715	Svil	225115	supervillin
A_52_P1180449	-2.427954	Rtn4	68585	reticulon 4
A_52_P462106	-2.1020536
A_52_P875878	-2.804991
A_52_P1131540	-3.1592464
A_52_P161526	-2.032113	Cdc26	66440	cell division cycle 26
A_52_P268489	-2.7273037	Prdm2	110593	PR domain containing 2, with ZNF domain
A_51_P120066	-2.2864192	9330151L19Rik	414085	RIKEN cDNA 9330151L19 gene
A_52_P812870	-2.4379928
A_52_P1068615	-2.4276187
A_51_P472857	-2.4113045	Olfr971	258607	olfactory receptor 971
A_51_P252650	-2.8153393	Olfr338	258949	olfactory receptor 338
A_52_P310040	-2.0129645	BC016423	105203	cDNA sequence BC016423
A_52_P740123	-2.1196473
A_52_P364021	-3.2220752	Mogat1	68393	monoacylglycerol O-acyltransferase 1
A_51_P208490	-2.303998
A_52_P1139646	-4.2307363
A_51_P394635	-2.983615	Clvs1	74438	clavesin 1
A_52_P251699	-2.0378814	Prodh2	56189	proline dehydrogenase (oxidase) 2
A_52_P475062	-2.5478399	Fam219b	78323	family with sequence similarity 219, member B
A_51_P189704	-3.0783043	Ankrd61	66729	ankyrin repeat domain 61
A_52_P121942	-2.6696913
A_52_P577662	-2.2342868	Ednrb	13618	endothelin receptor type B
A_52_P641477	-2.9961312	Wars2	70560	tryptophanyl tRNA synthetase 2 (mitochondrial)
A_51_P154585	-2.6704876	Vmn1r195	171257	vomeronasal 1 receptor 195
A_52_P433204	-2.5647793	Pds5a	71521	PDS5, regulator of cohesion maintenance, homolog A (S. cerevisiae)
A_52_P374193	-2.660658
A_52_P1069517	-2.1883123
A_51_P323400	-2.6726544
A_52_P150851	-2.6386507	Adamts12	239337	a disintegrin-like and metallopeptidase (reprolysin type) with thrombospondin type 1 motif, 12
A_52_P180741	-2.190412	Pcdhb17	93888	protocadherin beta 17
A_51_P248097	-4.1960397
A_51_P461475	-2.1894226	Atn1	13498	atrophin 1
A_52_P334796	-2.5443225	Taar4	209513	trace amine-associated receptor 4
A_51_P359516	-2.2763593	Rtn4rl2	269295	reticulon 4 receptor-like 2
A_52_P205854	-2.3954477	Tmc8	217356	transmembrane channel-like gene family 8
A_51_P379318	-3.3419132	Olfr127	258374	olfactory receptor 127
A_51_P286131	-2.0453231	Cutal	77996	cutA divalent cation tolerance homolog-like
A_52_P54609	-3.2625573	Eml1	68519	echinoderm microtubule associated protein like 1
A_52_P95882	-2.7248693	Srek1	218543	splicing regulatory glutamine/lysine-rich protein 1
A_51_P354094	-3.0140502	Dock7	67299	dedicator of cytokinesis 7
A_52_P409906	-2.3300278	Zfp788	67607	zinc finger protein 788
A_52_P228964	-3.0702655	Shprh	268281	SNF2 histone linker PHD RING helicase
A_51_P173469	-2.8393884	Tbkbp1	73174	TBK1 binding protein 1
A_51_P196663	-2.2974112	Cd209f	69142	CD209f antigen
A_52_P288251	-2.733619	Tmem204	407831	transmembrane protein 204
A_52_P187046	-2.1629822	Suv39h2	64707	suppressor of variegation 3-9 homolog 2 (Drosophila)
A_52_P819220	-3.793833
A_52_P110791	-3.0171678	Erbb2ip	59079	Erbb2 interacting protein
A_52_P498383	-5.320791	Dennd1b	329260	DENN/MADD domain containing 1B
A_52_P608523	-2.6204503	Chat	12647	choline acetyltransferase
A_52_P271495	-2.2314706
A_51_P167922	-3.0046337	Tifab	212937	TRAF-interacting protein with forkhead-associated domain, family member B
A_51_P493486	-4.5689936	Mllt4	17356	myeloid/lymphoid or mixed-lineage leukemia (trithorax homolog, Drosophila); translocated to, 4
A_52_P462049	-2.4361959	Clcn3	12725	chloride channel 3
A_52_P515959	-2.8285716	Creb5	231991	cAMP responsive element binding protein 5
A_52_P980013	-2.7267766	Sap30bp	57230	SAP30 binding protein
A_52_P1156127	-2.055438	LOC101056155	101056155	uncharacterized LOC101056155
A_52_P199922	-2.371262
A_52_P604864	-2.0354865	Il17rb	50905	interleukin 17 receptor B
A_52_P190977	-3.6788888	4932438A13Rik	229227	RIKEN cDNA 4932438A13 gene
A_52_P476086	-3.9239917	Nxf3	245610	nuclear RNA export factor 3
A_52_P122255	-2.407079	Prrxl1	107751	paired related homeobox protein-like 1
A_52_P916030	-3.2562528
A_52_P1075882	-2.0608177
A_52_P810625	-5.7936077	5730564C23Rik	77089	RIKEN cDNA 5730564C23 gene
A_52_P652406	-4.217696	Dclre1c	227525	DNA cross-link repair 1C, PSO2 homolog (S. cerevisiae)
A_52_P409988	-2.0233946	Slc2a2	20526	solute carrier family 2 (facilitated glucose transporter), member 2
A_51_P270725	-3.3199096	Phkb	102093	phosphorylase kinase beta
A_52_P55706	-2.5064328	Ntrk3	18213	neurotrophic tyrosine kinase, receptor, type 3
A_51_P139690	-2.1945696	Olfr51	18351	olfactory receptor 51
A_52_P1028440	-2.4451103
A_52_P795452	-2.19852
A_52_P137442	-2.1351285	Gm3002	100040852	alpha-takusan pseudogene
A_52_P224760	-2.7382963	Ptgs2	19225	prostaglandin-endoperoxide synthase 2
A_51_P460798	-2.336174	Lsamp	268890	limbic system-associated membrane protein
A_52_P486234	-2.4557445	Zfp207	22680	zinc finger protein 207
A_52_P373357	-3.8199954	Hmga2	15364	high mobility group AT-hook 2
A_51_P279714	-2.7658882	Olfr615	259084	olfactory receptor 615
A_51_P141223	-2.6708515
A_52_P209012	-2.3071983	A430106A12Rik	68164	RIKEN cDNA A430106A12 gene
A_52_P105020	-2.206493	5830428M24Rik	76062	RIKEN cDNA 5830428M24 gene
A_51_P430540	-2.0095758
A_51_P331638	-2.122645	Onecut3	246086	one cut domain, family member 3
A_51_P187726	-2.8934069	Dcun1d1	114893	DCN1, defective in cullin neddylation 1, domain containing 1 (S. cerevisiae)
A_52_P1131492	-2.318174
A_52_P102223	-2.231739	Pcnx	54604	pecanex homolog (Drosophila)
A_52_P665326	-2.1545594	Med13	327987	mediator complex subunit 13
A_52_P980341	-2.8056173
A_52_P77695	-3.1061718	Fam189b	68521	family with sequence similarity 189, member B
A_51_P330481	-3.2991908	Lhx9	16876	LIM homeobox protein 9
A_52_P868302	-2.9365437	Clpx	270166	caseinolytic peptidase X (E.coli)
A_52_P1084368	-3.6238499
A_51_P110547	-2.350643
A_51_P341336	-4.587057	Bcl2l14	66813	BCL2-like 14 (apoptosis facilitator)
A_52_P755632	-2.7181103
A_51_P227644	-2.033496	Gm5176	382421	high mobility group box 2 pseudogene
A_51_P163476	-2.3167953	5430403G16Rik	77200	RIKEN cDNA 5430403G16 gene
A_52_P377941	-2.545067	Pkhd1	241035	polycystic kidney and hepatic disease 1
A_52_P192325	-2.558482	Olfr1276	258390	olfactory receptor 1276
A_52_P296048	-2.1492453	Exosc7	66446	exosome component 7
A_51_P408329	-3.2432177
A_51_P469053	-2.8040593	Mfsd4	213006	major facilitator superfamily domain containing 4
A_52_P421897	-2.2312698	Morc4	75746	microrchidia 4
A_51_P119100	-2.7571816
A_52_P6404	-2.702124	Bptf	207165	bromodomain PHD finger transcription factor
A_52_P827362	-2.3562071
A_52_P228437	-2.7244198	Mbnl1	56758	muscleblind-like 1 (Drosophila)
A_52_P282448	-2.1958086	D830012I24Rik	320070	RIKEN cDNA D830012I24 gene
A_52_P553205	-2.067459	Rsrc1	66880	arginine/serine-rich coiled-coil 1
A_52_P18317	-3.5100644
A_52_P568955	-2.1069129	6230426I18Rik	76143	RIKEN cDNA 6230426I18 gene
A_52_P521801	-2.026186
A_52_P520173	-4.2252445
A_51_P325217	-3.139025	9630055L06Rik	319580	RIKEN cDNA 9630055L06 gene
A_52_P715783	-3.4814115
A_51_P519030	-2.2925599	Nutm1	213765	NUT midline carcinoma, family member 1
A_52_P883800	-3.0010624
A_52_P641496	-2.2733061	A930009E08Rik	68168	RIKEN cDNA A930009E08 gene
A_51_P439996	-2.0145602	Gp5	14729	glycoprotein 5 (platelet)
A_52_P466860	-5.3731422	Rab3c	67295	RAB3C, member RAS oncogene family
A_52_P544476	-2.4993517	Terc	21748	telomerase RNA component
A_51_P313944	-3.6582532
A_52_P349318	-2.131733	B3gat1	76898	beta-1,3-glucuronyltransferase 1 (glucuronosyltransferase P)
A_51_P299235	-3.318813	Fcamr	64435	Fc receptor, IgA, IgM, high affinity
A_51_P231113	-2.5872958	Olfr613	259104	olfactory receptor 613
A_52_P432770	-2.1398292	Nfatc3	18021	nuclear factor of activated T cells, cytoplasmic, calcineurin dependent 3
A_52_P661412	-2.3124704	Adora1	11539	adenosine A1 receptor
A_52_P76277	-3.3524432	Krt10	16661	keratin 10
A_52_P234432	-2.347178	Pard3	93742	par-3 (partitioning defective 3) homolog (C. elegans)
A_52_P1052518	-3.6470659
A_51_P163354	-2.1895115	Ogdhl	239017	oxoglutarate dehydrogenase-like
A_52_P175974	-2.1136951	Olfr308	258614	olfactory receptor 308
A_51_P334532	-2.9040127	2900006A17Rik	72913	RIKEN cDNA 2900006A17 gene
A_51_P191087	-2.1464798	Cep250	16328	centrosomal protein 250
A_51_P413782	-2.0077395
A_51_P284638	-2.359676
A_51_P202920	-2.248916	Wbscr17	212996	Williams-Beuren syndrome chromosome region 17 homolog (human)
A_52_P220573	-3.4797964	Serpini1	20713	serine (or cysteine) peptidase inhibitor, clade I, member 1
A_52_P690675	-2.0763743
A_52_P49457	-2.117226	Fbxl16	214931	F-box and leucine-rich repeat protein 16
A_52_P532456	-3.7737122	Plagl1	22634	pleiomorphic adenoma gene-like 1
A_52_P427818	-2.0771167	Zscan18	232875	zinc finger and SCAN domain containing 18
A_52_P427505	-2.0247872	Ccdc167	68597	coiled-coil domain containing 167
A_51_P379750	-2.093012	Myoz1	59011	myozenin 1
A_52_P707459	-2.1312132
A_52_P1076565	-2.3496997
A_51_P467086	-3.9461942	Defa3	13237	defensin, alpha, 3
A_52_P417727	-2.2723842	Olfr1170	258525	olfactory receptor 1170
A_52_P575797	-2.714489	Zscan20	269585	zinc finger and SCAN domains 20
A_52_P233515	-2.2602534	Ttll13	269954	tubulin tyrosine ligase-like family, member 13
A_52_P207261	-2.5985825	Cog5	238123	component of oligomeric golgi complex 5
A_52_P1076387	-2.2325764	Ubn2	320538	ubinuclein 2
A_52_P578159	-2.7088463
A_51_P388325	-2.2070043	Clgn	12745	calmegin
A_51_P393624	-3.3275158	Wdr19	213081	WD repeat domain 19
A_52_P1107462	-3.282644	Gm13629	100038743	predicted gene 13629
A_52_P105707	-4.3326826
A_52_P1156219	-3.4347067
A_52_P1011984	-2.3461306
A_52_P1131754	-2.456382	Erbb2ip	59079	Erbb2 interacting protein
A_51_P421724	-2.976135	St6galnac5	26938	ST6 (alpha-N-acetyl-neuraminyl-2,3-beta-galactosyl-1,3)-N-acetylgalactosaminide alpha-2,6-sialyltransferase 5
A_52_P488039	-2.6491735
A_51_P372112	-2.1753345	Gpc6	23888	glypican 6
A_51_P416771	-3.3642085	Ranbp3l	223332	RAN binding protein 3-like
A_51_P209921	-2.0433242	9330159F19Rik	212448	RIKEN cDNA 9330159F19 gene
A_52_P54629	-6.3240848	Ptpla	30963	protein tyrosine phosphatase-like (proline instead of catalytic arginine), member a
A_52_P567531	-2.4202528	Cntn1	12805	contactin 1
A_51_P337230	-3.0733721	Galnt14	71685	UDP-N-acetyl-alpha-D-galactosamine:polypeptide N-acetylgalactosaminyltransferase 14
A_52_P115234	-2.3258848
A_52_P1156932	-2.0203204
A_51_P402144	-2.421025	2300002M23Rik	69542	RIKEN cDNA 2300002M23 gene
A_52_P1043533	-3.671528
A_51_P167562	-2.1910527	Erdr1	170942	erythroid differentiation regulator 1
A_52_P459538	-2.8308606	Mkln1	27418	muskelin 1, intracellular mediator containing kelch motifs
A_52_P266725	-2.6330376
A_52_P17536	-2.0958848	Sf1	22668	splicing factor 1
A_51_P443584	-2.6595569	Foxd4	14237	forkhead box D4
A_52_P803354	-3.0584822
A_52_P437105	-2.6732385
A_52_P386207	-2.2026849	Vmn1r196	100312484	vomeronasal 1 receptor 196
A_52_P360529	-2.0905206	Frmd4a	209630	FERM domain containing 4A
A_52_P201892	-3.27659	Mnat1	17420	menage a trois 1
A_51_P505571	-2.6226275	Chrdl2	69121	chordin-like 2
A_52_P591050	-2.6565988
A_52_P150294	-2.0378625	Jkamp	104771	JNK1/MAPK8-associated membrane protein
A_51_P118433	-3.8890283	Zxda	668171	zinc finger, X-linked, duplicated A
A_51_P494037	-2.405579	Dgkg	110197	diacylglycerol kinase, gamma
A_52_P418814	-2.6079254	Pmch	110312	pro-melanin-concentrating hormone
A_51_P492648	-2.8189263	Bmpr2	12168	bone morphogenetic protein receptor, type II (serine/threonine kinase)
A_51_P350562	-2.2194853	Lztfl1	93730	leucine zipper transcription factor-like 1
A_52_P540002	-2.8129401	Pibf1	52023	progesterone immunomodulatory binding factor 1
A_51_P183543	-3.6924777
A_51_P101006	-2.1069133	Ak8	68870	adenylate kinase 8
A_51_P445467	-2.6721518	Olfr1472	258685	olfactory receptor 1472
A_52_P295140	-2.3817434	Glb1l3	70893	galactosidase, beta 1 like 3
A_51_P127215	-2.103253	Sesn3	75747	sestrin 3
A_51_P387769	-3.343763	Clec2l	665180	C-type lectin domain family 2, member L
A_51_P347552	-2.7070527
A_51_P109649	-2.60187	Meg3	17263	maternally expressed 3
A_52_P442274	-3.3786483	Mto1	68291	mitochondrial translation optimization 1 homolog (S. cerevisiae)
A_51_P337412	-2.0744445	Efemp1	216616	epidermal growth factor-containing fibulin-like extracellular matrix protein 1
A_51_P218278	-2.660077	Gpr173	70771	G-protein coupled receptor 173
A_52_P161941	-2.414305
A_52_P280658	-2.1512196
A_51_P479541	-2.2101805	Mtx3	382793	metaxin 3
A_52_P1115637	-2.6276755
A_51_P402267	-6.0404696	Slc17a3	105355	solute carrier family 17 (sodium phosphate), member 3
A_52_P322412	-2.8290305	Rnf152	320311	ring finger protein 152
A_51_P267587	-2.4110363	Gdap10	100504486	ganglioside-induced differentiation-associated-protein 10
A_51_P233088	-2.1984162	Lhx4	16872	LIM homeobox protein 4
A_52_P670399	-2.2433891
A_52_P723223	-2.161968
A_51_P485161	-2.4553244	Cplx2	12890	complexin 2
A_51_P195783	-4.377559	Neil3	234258	nei like 3 (E. coli)
A_52_P153179	-2.0315812	Il31	76399	interleukin 31
A_52_P179211	-2.2298145	Zmym5	219105	zinc finger, MYM-type 5
A_51_P339434	-2.8250287	4921530L21Rik	66732	RIKEN cDNA 4921530L21 gene
A_52_P279990	-2.1554766
A_51_P172241	-2.1551573
A_51_P302626	-2.4444106	Hnf1a	21405	HNF1 homeobox A
A_51_P299260	-2.2872992	Acad11	102632	acyl-Coenzyme A dehydrogenase family, member 11
A_52_P585552	-3.2023754	Snx10	71982	sorting nexin 10
A_52_P400234	-2.3217077	Strip1	229707	striatin interacting protein 1
A_52_P81038	-2.4068189	Mettl21c	433294	methyltransferase like 21C
A_52_P155500	-2.455953	Olfr1372-ps1	257871	olfactory receptor 1372, pseudogene 1
A_52_P1148341	-2.0095372
A_52_P635078	-2.0330565	Lrp4	228357	low density lipoprotein receptor-related protein 4
A_52_P207406	-2.4176395	Tmeff1	230157	transmembrane protein with EGF-like and two follistatin-like domains 1
A_52_P199557	-2.216179	1700034J05Rik	73344	RIKEN cDNA 1700034J05 gene
A_51_P398201	-6.2463856
A_52_P601996	-2.7929354	Fbxl17	50758	F-box and leucine-rich repeat protein 17
A_51_P520809	-3.2516518	2300010F08Rik	71875	RIKEN cDNA 2300010F08 gene
A_52_P724724	-2.8035452
A_52_P488720	-2.2351332	Tpp2	22019	tripeptidyl peptidase II
A_52_P562807	-2.1432464	3110052M02Rik	73229	RIKEN cDNA 3110052M02 gene
A_51_P346214	-3.105116	Gfpt2	14584	glutamine fructose-6-phosphate transaminase 2
A_52_P439975	-2.2442544	2410017I17Rik	675325	RIKEN cDNA 2410017I17 gene
A_51_P367434	-2.1568713	Tmed5	73130	transmembrane emp24 protein transport domain containing 5
A_52_P352771	-2.9453766	Tfap2b	21419	transcription factor AP-2 beta
A_52_P502102	-2.3294804	2310001H17Rik	76432	RIKEN cDNA 2310001H17 gene
A_51_P448856	-2.074305	Elf4	56501	E74-like factor 4 (ets domain transcription factor)
A_51_P256747	-2.6300936	Adcy10	271639	adenylate cyclase 10
A_51_P425510	-8.681924	Mmp20	30800	matrix metallopeptidase 20 (enamelysin)
A_52_P218449	-2.5791361	Cyp4a31	666168	cytochrome P450, family 4, subfamily a, polypeptide 31
A_52_P169884	-3.143857	D130039L10Rik	320488	RIKEN cDNA D130039L10 gene
A_52_P35861	-2.3805954	Uimc1	20184	ubiquitin interaction motif containing 1
A_52_P506250	-3.5261703	Olfr441	258649	olfactory receptor 441
A_52_P573858	-2.2717075
A_52_P915307	-2.8003204
A_52_P947954	-2.0742283
A_52_P1193423	-2.0821047	Prr22	100504446	proline rich 22
A_52_P201867	-2.4225836	Lpp	210126	LIM domain containing preferred translocation partner in lipoma
A_52_P722931	-2.455637
A_51_P504833	-4.2347503	Brinp2	240843	bone morphogenic protein/retinoic acid inducible neural-specific 2
A_51_P363218	-4.2787204	Dhx58	80861	DEXH (Asp-Glu-X-His) box polypeptide 58
A_52_P843701	-5.7030983
A_52_P659470	-2.4637835	Rgs9bp	243923	regulator of G-protein signalling 9 binding protein
A_52_P424484	-4.6470304	Apool	68117	apolipoprotein O-like
A_52_P1164065	-2.2303793	Dclk1	13175	doublecortin-like kinase 1
A_51_P500806	-2.1775186	Exosc8	69639	exosome component 8
A_51_P169436	-2.4906995
A_52_P272854	-2.129898
A_52_P42373	-2.1842053	Wdr72	546144	WD repeat domain 72
A_51_P150996	-4.1931276	6720422M22Rik	99946	RIKEN cDNA 6720422M22 gene
A_52_P23674	-2.3040628	Gpr113	381628	G protein-coupled receptor 113
A_51_P491710	-2.01663	Wars2	70560	tryptophanyl tRNA synthetase 2 (mitochondrial)
A_52_P908952	-3.629137	LOC101056177	101056177	uncharacterized LOC101056177
A_52_P637582	-2.1506505
A_51_P325501	-2.9166846	Crip3	114570	cysteine-rich protein 3
A_51_P196102	-4.253816	E330021A06Rik	319523	RIKEN cDNA E330021A06 gene
A_51_P350069	-2.2276995	Olfr1189	258768	olfactory receptor 1189
A_51_P364421	-2.1039495	Vamp7	20955	vesicle-associated membrane protein 7
A_52_P788229	-3.1155248	Chchd7	66433	coiled-coil-helix-coiled-coil-helix domain containing 7
A_52_P739078	-2.334876
A_52_P537527	-3.2883852	Msh2	17685	mutS homolog 2 (E. coli)
A_52_P203269	-2.3286498	Kcnip3	56461	Kv channel interacting protein 3, calsenilin
A_52_P916539	-2.1327376	Zbtb34	241311	zinc finger and BTB domain containing 34
A_52_P451830	-2.583546	1700042G07Rik	67323	RIKEN cDNA 1700042G07 gene
A_52_P434742	-2.2031684	4933408J17Rik	74454	RIKEN cDNA 4933408J17 gene
A_52_P633489	-2.273383	C1qtnf4	67445	C1q and tumor necrosis factor related protein 4
A_51_P414746	-3.0092835	Defb15	246082	defensin beta 15
A_52_P408728	-2.75077	Plp1	18823	proteolipid protein (myelin) 1
A_52_P691944	-4.463358
A_52_P287954	-2.231029	Syn3	27204	synapsin III
A_51_P404565	-2.01682	Ap1s3	252903	adaptor-related protein complex AP-1, sigma 3
A_52_P281659	-5.3901505	Klf13	50794	Kruppel-like factor 13
A_52_P483269	-2.570474	Slc22a15	242126	solute carrier family 22 (organic anion/cation transporter), member 15
A_52_P423810	-2.090661	Mt1	17748	metallothionein 1
A_51_P305811	-2.5543287	1700021A07Rik	76924	RIKEN cDNA 1700021A07 gene
A_52_P795289	-2.8544793
A_51_P468544	-2.9842176
A_51_P285077	-3.3561273	Hhatl	74770	hedgehog acyltransferase-like
A_52_P333222	-2.3691006
A_51_P395519	-2.7424498
A_52_P192059	-3.1469843	Nup210l	77595	nucleoporin 210-like
A_52_P1116212	-3.4579642
A_52_P399095	-2.680405	Mettl24	327747	methyltransferase like 24
A_51_P292460	-3.6974304	Wnk1	232341	WNK lysine deficient protein kinase 1
A_51_P325889	-2.199278	4933407L21Rik	71141	RIKEN cDNA 4933407L21 gene
A_52_P628731	-3.9704795	Gtf2e1	74197	general transcription factor II E, polypeptide 1 (alpha subunit)
A_51_P247030	-2.1008577	Vwa5b2	328643	von Willebrand factor A domain containing 5B2
A_52_P13815	-3.058442	Laptm5	16792	lysosomal-associated protein transmembrane 5
A_51_P483878	-3.111657	Pcdhb9	93880	protocadherin beta 9
A_51_P285418	-2.1773686	Olfr568	259095	olfactory receptor 568
A_51_P364529	-3.3023818
A_52_P502351	-2.2123153	Fzd3	14365	frizzled homolog 3 (Drosophila)
A_52_P269637	-2.4856012	Ctage5	217615	CTAGE family, member 5
A_52_P469165	-2.4995475	Nkx2-4	228731	NK2 homeobox 4
A_52_P247092	-2.1167557	4922501C03Rik	382090	RIKEN cDNA 4922501C03 gene
A_52_P1180220	-2.2984214
A_52_P222496	-2.1682813
A_52_P196721	-3.78931	Ndnl2	66647	necdin-like 2
A_52_P226046	-2.7755437	Pex2	19302	peroxisomal biogenesis factor 2
A_52_P132353	-3.5820181
A_52_P284535	-2.0924318	Ftmt	67634	ferritin mitochondrial
A_51_P263568	-2.0606928	Prss27	213171	protease, serine, 27
A_52_P811454	-3.2085829
A_52_P499541	-3.1584926	Dlg1	13383	discs, large homolog 1 (Drosophila)
A_51_P211403	-2.6929395	Gcgr	14527	glucagon receptor
A_51_P509750	-3.8868086
A_51_P255899	-2.66407	Tgfbr3	21814	transforming growth factor, beta receptor III
A_51_P503560	-2.6604328
A_51_P305547	-2.6007185	Snai2	20583	snail homolog 2 (Drosophila)
A_52_P14342	-2.2090042	D930016D06Rik	100662	RIKEN cDNA D930016D06 gene
A_52_P640840	-2.2405045
A_52_P988213	-2.2739382
A_52_P627068	-2.2298932	Disp2	214240	dispatched homolog 2 (Drosophila)
A_51_P272323	-2.6797588	Mlph	171531	melanophilin
A_51_P485870	-2.1953006	BC027072	225004	cDNA sequence BC027072
A_52_P193449	-3.0032697	Iqch	78250	IQ motif containing H
A_52_P552788	-2.546612
A_52_P258796	-2.5869613
A_51_P250058	-2.5122507	Epas1	13819	endothelial PAS domain protein 1
A_51_P452682	-3.4110198	Pou5f2	75507	POU domain class 5, transcription factor 2
A_51_P403477	-3.7795224	Dio1	13370	deiodinase, iodothyronine, type I
A_51_P204252	-2.250602	Efhb	211482	EF hand domain family, member B
A_51_P509432	-2.9169748
A_52_P149336	-3.2832987	Kif20b	240641	kinesin family member 20B
A_52_P73201	-2.1175892
A_52_P574993	-2.742256	Pappa2	23850	pappalysin 2
A_51_P192939	-3.5684388
A_52_P668625	-2.6182735	Golga3	269682	golgi autoantigen, golgin subfamily a, 3
A_52_P891936	-2.6625412
A_52_P602098	-2.7204723	Otud7b	229603	OTU domain containing 7B
A_52_P1132297	-2.0678623
A_52_P619388	-2.3672893	Kcnq1ot1	63830	KCNQ1 overlapping transcript 1
A_51_P284867	-2.5521054	D230038C21	328872	uncharacterized protein D230038C21
A_52_P26118	-2.35023	Slc12a1	20495	solute carrier family 12, member 1
A_52_P518202	-2.738571	Efcab14	230648	EF-hand calcium binding domain 14
A_51_P456914	-2.4268992	B630005N14Rik	101148	RIKEN cDNA B630005N14 gene
A_52_P699954	-2.0035186
A_52_P507649	-3.6055677	B130065D12Rik	320104	RIKEN cDNA B130065D12 gene
A_51_P513573	-2.5867832	Ces2c	234671	carboxylesterase 2C
A_51_P233597	-2.5211358	Retn	57264	resistin
A_52_P473106	-2.8616703	Otos	260301	otospiralin
A_52_P1130726	-3.4808133
A_52_P523044	-2.2359571	Casc1	320662	cancer susceptibility candidate 1
A_52_P628117	-3.305707	Abcc5	27416	ATP-binding cassette, sub-family C (CFTR/MRP), member 5
A_52_P54849	-2.2586095	Madd	228355	MAP-kinase activating death domain
A_51_P207237	-2.3242261	Krt1	16678	keratin 1
A_52_P413840	-2.3286123	Pgr	18667	progesterone receptor
A_52_P529051	-4.8587666
A_52_P234333	-2.4860466	Slc38a9	268706	solute carrier family 38, member 9
A_51_P189425	-2.2853518	Rap2c	72065	RAP2C, member of RAS oncogene family
A_52_P219060	-2.1309175	D14Abb1e	218850	DNA segment, Chr 14, Abbott 1 expressed
A_51_P448464	-2.8562598	Masp2	17175	mannan-binding lectin serine peptidase 2
A_52_P1196325	-3.6892388
A_52_P940338	-4.2861004	LOC382202	382202	uncharacterized LOC382202
A_51_P210210	-2.861609	Ly6g5c	114652	lymphocyte antigen 6 complex, locus G5C
A_51_P386648	-2.6381657	Glod5	69824	glyoxalase domain containing 5
A_51_P379618	-3.1147606	Aadat	23923	aminoadipate aminotransferase
A_51_P139096	-2.4838839	1700122O11Rik	76651	RIKEN cDNA 1700122O11 gene
A_52_P368057	-2.1884038	Slc7a11	26570	solute carrier family 7 (cationic amino acid transporter, y+ system), member 11
A_52_P650156	-2.512345
A_51_P194984	-2.1534925	4933408B17Rik	271508	RIKEN cDNA 4933408B17 gene
A_52_P235358	-2.4587624	Pigl	327942	phosphatidylinositol glycan anchor biosynthesis, class L
A_51_P196455	-3.3269699	Ipp	16351	IAP promoted placental gene
A_52_P835189	-2.3259833	Gm14023	100503468	predicted gene 14023
A_51_P107722	-2.6626387
A_51_P181025	-2.6270087
A_52_P533280	-3.539241	Prm1	19118	protamine 1
A_52_P502981	-3.2387776
A_52_P850143	-4.680728	5730480H06Rik	70592	RIKEN cDNA 5730480H06 gene
A_51_P188501	-2.619299
A_52_P161934	-2.2436562	Rbbp8	225182	retinoblastoma binding protein 8
A_51_P267063	-3.0252337	Ugt3a2	223337	UDP glycosyltransferases 3 family, polypeptide A2
A_52_P1052436	-2.3668942
A_52_P491616	-2.3546245	Nos1ap	70729	nitric oxide synthase 1 (neuronal) adaptor protein
A_52_P963729	-3.0578535
A_52_P113100	-2.0469594	Pan2	103135	PAN2 polyA specific ribonuclease subunit homolog (S. cerevisiae)
A_51_P444856	-2.4385033
A_52_P35670	-2.5744517	Snapc3	77634	small nuclear RNA activating complex, polypeptide 3
A_52_P557837	-2.2584128
A_52_P924051	-3.6034577
A_52_P615245	-2.099931
A_52_P51029	-2.3897643	Ralgapa1	56784	Ral GTPase activating protein, alpha subunit 1
A_52_P610987	-2.602276	Slc28a3	114304	solute carrier family 28 (sodium-coupled nucleoside transporter), member 3
A_52_P537647	-2.1255705	Raf1	110157	v-raf-leukemia viral oncogene 1
A_52_P574378	-2.1105053
A_52_P242293	-2.282121
A_52_P99810	-4.316834	Cx3cr1	13051	chemokine (C-X3-C) receptor 1
A_52_P30341	-2.295708	Itgav	16410	integrin alpha V
A_51_P323320	-2.0819902	Dync2h1	110350	dynein cytoplasmic 2 heavy chain 1
A_51_P400453	-3.0895302	Pten	19211	phosphatase and tensin homolog
A_52_P793889	-3.136226	2810410P21Rik	72731	RIKEN cDNA 2810410P21 gene
A_51_P269375	-3.1630032	Ank1	11733	ankyrin 1, erythroid
A_52_P168023	-2.7717268	Klhl15	236904	kelch-like 15
A_51_P398579	-2.9624083	Zfp280d	235469	zinc finger protein 280D
A_52_P69656	-2.0107083	Hnf4a	15378	hepatic nuclear factor 4, alpha
A_52_P231697	-2.4718778
A_52_P615427	-2.6024132	Hspa12a	73442	heat shock protein 12A
A_51_P232207	-3.2368557	Hoxb6	15414	homeobox B6
A_52_P438359	-2.1825442
A_51_P212958	-2.0990958	Psors1c2	57390	psoriasis susceptibility 1 candidate 2 (human)
A_51_P115139	-3.0196896	Olfr1417	258938	olfactory receptor 1417
A_51_P195244	-2.0279152	Mfap4	76293	microfibrillar-associated protein 4
A_52_P924229	-2.1214533
A_52_P129706	-2.8751545	Galnt11	231050	UDP-N-acetyl-alpha-D-galactosamine:polypeptide N-acetylgalactosaminyltransferase 11
A_51_P485237	-2.2109685
A_52_P617655	-2.106207	Spaca6	75202	sperm acrosome associated 6
A_52_P621732	-2.578128	Lrrc29	234684	leucine rich repeat containing 29
A_51_P506309	-2.8497036	Hrg	94175	histidine-rich glycoprotein
A_51_P359636	-2.1610658	Lgals3bp	19039	lectin, galactoside-binding, soluble, 3 binding protein
A_52_P498869	-2.3701026
A_52_P625249	-2.009003	Cyp2c37	13096	cytochrome P450, family 2. subfamily c, polypeptide 37
A_51_P368620	-2.1959693	Adam3	11497	a disintegrin and metallopeptidase domain 3 (cyritestin)
A_51_P170105	-2.186626	Alx4	11695	aristaless-like homeobox 4
A_52_P1083427	-4.4647107	9430013L17Rik	77266	RIKEN cDNA 9430013L17 gene
A_51_P506695	-2.4242706	Tinf2	28113	Terf1 (TRF1)-interacting nuclear factor 2
A_51_P235015	-3.6867695
A_52_P125795	-2.1673918	Mogat2	233549	monoacylglycerol O-acyltransferase 2
A_51_P501730	-2.8900983	Crispld2	78892	cysteine-rich secretory protein LCCL domain containing 2
A_51_P412705	-3.3958642
A_52_P331212	-2.454522	Cspp1	211660	centrosome and spindle pole associated protein 1
A_51_P198473	-2.4522157	Hnf4a	15378	hepatic nuclear factor 4, alpha
A_51_P189631	-2.5965207	2310067E19Rik	76455	RIKEN cDNA 2310067E19 gene
A_52_P282302	-5.49771	Ufsp2	192169	UFM1-specific peptidase 2
A_51_P374533	-2.1752124	Olfr374	258335	olfactory receptor 374
A_51_P326140	-3.601082	Figla	26910	folliculogenesis specific basic helix-loop-helix
A_52_P600304	-2.0901232	Slc25a46	67453	solute carrier family 25, member 46
A_51_P343733	-2.377866	Slc39a2	214922	solute carrier family 39 (zinc transporter), member 2
A_51_P234985	-2.5793653	Olfr975	258825	olfactory receptor 975
A_52_P411305	-2.2716734	Tsc1	64930	tuberous sclerosis 1
A_51_P326499	-2.0219543	Chek1	12649	checkpoint kinase 1
A_51_P276267	-2.4870389	Spib	272382	Spi-B transcription factor (Spi-1/PU.1 related)
A_52_P322781	-3.0309916	Atad1	67979	ATPase family, AAA domain containing 1
A_52_P521770	-2.5876803	Plxna4	243743	plexin A4
A_52_P642501	-2.0161872	Ddx46	212880	DEAD (Asp-Glu-Ala-Asp) box polypeptide 46
A_51_P410516	-2.0159106
A_52_P931180	-2.752281
A_52_P208710	-2.0076787
A_52_P200919	-2.3879426
A_51_P248687	-2.11255	Hormad2	75828	HORMA domain containing 2
A_51_P420666	-3.081412	Olfr24	18322	olfactory receptor 24
A_52_P287313	-2.1559196	Gm1661	381544	predicted gene 1661
A_51_P169255	-2.346446	Olfr190	258392	olfactory receptor 190
A_52_P280821	-2.3096116
A_52_P972476	-3.6377838
A_52_P74680	-2.023355	Trbv1	621968	T cell receptor beta, variable 1
A_51_P498602	-2.463157
A_51_P318300	-2.6146095
A_51_P327369	-2.292276	Plekhg3	263406	pleckstrin homology domain containing, family G (with RhoGef domain) member 3
A_52_P394835	-2.5458238	Nipbl	71175	Nipped-B homolog (Drosophila)
A_52_P1004070	-2.0709362
A_52_P1035788	-3.588477
A_52_P1171983	-2.5537393
A_51_P136601	-4.612984	Trim7	94089	tripartite motif-containing 7
A_52_P625102	-2.1790106	B230206H07Rik	320871	RIKEN cDNA B230206H07 gene
A_52_P606742	-2.6507013	Pax8	18510	paired box gene 8
A_51_P364250	-3.068155	Itih5	209378	inter-alpha (globulin) inhibitor H5
A_52_P601264	-2.8471522	Itgav	16410	integrin alpha V
A_52_P636608	-3.9295864	Fam184b	58227	family with sequence similarity 184, member B
A_52_P900433	-2.9090326
A_51_P218137	-4.7176194	Mettl7a1	70152	methyltransferase like 7A1
A_52_P738953	-2.009599
A_51_P417109	-2.0130005	Zfp51	22709	zinc finger protein 51
A_51_P148966	-2.2334394	5730410E19Rik	70517	RIKEN cDNA 5730410E19 gene
A_52_P454703	-2.6278193
A_51_P210350	-2.132608	Slc17a8	216227	solute carrier family 17 (sodium-dependent inorganic phosphate cotransporter), member 8
A_52_P545066	-3.047158	Hdgfrp3	29877	hepatoma-derived growth factor, related protein 3
A_52_P755764	-2.2469542
A_52_P522601	-2.249975	Chrne	11448	cholinergic receptor, nicotinic, epsilon polypeptide
A_52_P448578	-2.1359222	Rbm25	67039	RNA binding motif protein 25
A_51_P296182	-2.007378	Slc43a2	215113	solute carrier family 43, member 2
A_52_P930891	-2.8887715	B830007D08Rik	77850	RIKEN cDNA B830007D08 gene
A_52_P159738	-2.237623
A_51_P118664	-2.3708017	Atrx	22589	alpha thalassemia/mental retardation syndrome X-linked homolog (human)
A_52_P534844	-2.004267	Atp8a1	11980	ATPase, aminophospholipid transporter (APLT), class I, type 8A, member 1
A_52_P34861	-2.0379984	Speer7-ps1	75858	spermatogenesis associated glutamate (E)-rich protein 7, pseudogene 1
A_51_P356265	-3.2072046	Acrbp	54137	proacrosin binding protein
A_52_P1131821	-2.2833571	Dlg2	23859	discs, large homolog 2 (Drosophila)
A_52_P1157511	-2.330335
A_51_P243122	-2.2055814	Sec14l3	380683	SEC14-like 3 (S. cerevisiae)
A_52_P124665	-2.0003748	Nf2	18016	neurofibromatosis 2
A_51_P352245	-2.9611819	Sema6a	20358	sema domain, transmembrane domain (TM), and cytoplasmic domain, (semaphorin) 6A
A_52_P875725	-2.4454195
A_52_P325265	-2.6232054	Ndufaf4	68493	NADH dehydrogenase (ubiquinone) 1 alpha subcomplex, assembly factor 4
A_52_P1164289	-4.604113
A_51_P382347	-3.0446885	Nphp3	74025	nephronophthisis 3 (adolescent)
A_51_P445153	-2.788642	Spry2	24064	sprouty homolog 2 (Drosophila)
A_52_P723294	-3.3104
A_51_P190509	-2.1149683	Wfdc5	209232	WAP four-disulfide core domain 5
A_52_P40704	-2.0755374	Sap130	269003	Sin3A associated protein
A_51_P503756	-2.2547228	Iglv1	16142	immunoglobulin lambda variable 1
A_52_P859333	-2.1185591
A_51_P390181	-2.2815208	A430061O12Rik	319285	RIKEN cDNA A430061O12 gene
A_51_P227845	-2.2735019	4930502E18Rik	75013	RIKEN cDNA 4930502E18 gene
A_52_P337778	-2.155895
A_52_P1148142	-2.9564862
A_52_P963570	-2.6452267
A_52_P144964	-2.568293	Ccdc41	77048	coiled-coil domain containing 41
A_51_P203306	-2.0416327	Vmn1r216	171279	vomeronasal 1 receptor 216
A_51_P130951	-2.458978	Rpap1	68925	RNA polymerase II associated protein 1
A_52_P604398	-2.367006	Vps37a	52348	vacuolar protein sorting 37A (yeast)
A_52_P436282	-3.8437872
A_52_P110604	-2.7005692	Hmg20a	66867	high mobility group 20A
A_52_P24884	-2.519172	Exoc4	20336	exocyst complex component 4
A_52_P596357	-2.1913548
A_52_P352512	-2.1881	1700056N10Rik	73392	RIKEN cDNA 1700056N10 gene
A_52_P278035	-2.1644082	Tnc	21923	tenascin C
A_51_P213691	-3.1433668	Scnn1a	20276	sodium channel, nonvoltage-gated 1 alpha
A_51_P420698	-2.2026486	Pcm1	18536	pericentriolar material 1
A_51_P220323	-2.0293598	Kmt2c	231051	lysine (K)-specific methyltransferase 2C
A_51_P308290	-2.8256962	2810468N07Rik	72834	RIKEN cDNA 2810468N07 gene
A_51_P222057	-2.7180285	Olfr17	18314	olfactory receptor 17
A_52_P73126	-2.5108485	Epb4.2	13828	erythrocyte protein band 4.2
A_52_P255458	-2.4096134	Airn	104103	antisense Igf2r RNA
A_51_P189899	-5.885913	Olfr1134	259032	olfactory receptor 1134
A_51_P440155	-2.2971761
A_51_P153973	-2.206614	Zfp273	212569	zinc finger protein 273
A_51_P284293	-2.0976415	Zfyve9	230597	zinc finger, FYVE domain containing 9
A_52_P499902	-2.6232343	Sgk3	170755	serum/glucocorticoid regulated kinase 3
A_52_P563860	-2.4273798	Nck1	17973	non-catalytic region of tyrosine kinase adaptor protein 1
A_51_P428384	-2.3182325	Ttyh1	57776	tweety homolog 1 (Drosophila)
A_52_P1123509	-4.381267
A_51_P278305	-2.2557645	Golim4	73124	golgi integral membrane protein 4
A_51_P436567	-2.040168	Ces2b	234669	carboxyesterase 2B
A_52_P36293	-3.0025818	Mob1b	68473	MOB kinase activator 1B
A_51_P343238	-3.9292068
A_51_P474053	-3.1288157	Erv3	71995	endogenous retroviral sequence 3
A_52_P989183	-2.2462673
A_52_P1012332	-2.3282092
A_51_P303217	-2.773027	Ucma	68527	upper zone of growth plate and cartilage matrix associated
A_51_P336169	-2.3124132	Cd46	17221	CD46 antigen, complement regulatory protein
A_51_P339943	-3.6439269	Nid1	18073	nidogen 1
A_52_P225584	-2.314032	Abhd15	67477	abhydrolase domain containing 15
A_51_P300666	-2.673919	Npb	208990	neuropeptide B
A_51_P508666	-2.4381902
A_52_P623809	-2.5541856
A_51_P206225	-3.0405943	Uroc1	243537	urocanase domain containing 1
A_51_P469550	-3.1103451	Slc18a2	214084	solute carrier family 18 (vesicular monoamine), member 2
A_52_P374754	-2.4713087	Olfr1305	258396	olfactory receptor 1305
A_52_P963966	-3.4336247
A_51_P293989	-2.226635	Senp6	215351	SUMO/sentrin specific peptidase 6
A_52_P683836	-4.071049
A_51_P392593	-4.2826223	Dmxl1	240283	Dmx-like 1
A_51_P136680	-2.7219286	Krtap31-1	70831	keratin associated protein 31-1
A_52_P403688	-2.1558237
A_51_P340726	-2.0025077	1500026H17Rik	69002	RIKEN cDNA 1500026H17 gene
A_51_P393375	-2.6278129	Kcna2	16490	potassium voltage-gated channel, shaker-related subfamily, member 2
A_52_P556266	-3.037709	Ago3	214150	argonaute RISC catalytic subunit 3
A_52_P907731	-2.922926	LOC552877	552877	uncharacterized LOC552877
A_51_P122157	-2.0064626	Fam154b	330577	family with sequence similarity 154, member B
A_51_P444084	-2.9488585
A_51_P112476	-2.1352684
A_51_P463177	-2.2636597	9230110F15Rik	77080	RIKEN cDNA 9230110F15 gene
A_52_P860519	-3.0116675	Fam35a	75698	family with sequence similarity 35, member A
A_52_P34420	-2.06958	Brpf3	268936	bromodomain and PHD finger containing, 3
A_52_P77610	-2.0257056	Trav14d-3-dv8	634322	T cell receptor alpha variable 14D-3-DV8
A_51_P520760	-3.9845352
A_51_P402736	-2.0712206
A_51_P341978	-2.2639656	Uba3	22200	ubiquitin-like modifier activating enzyme 3
A_51_P351062	-3.4430494	Odf4	252868	outer dense fiber of sperm tails 4
A_52_P444815	-2.067001	Epo	13856	erythropoietin
A_52_P779070	-6.4714518
A_51_P188749	-2.103159	Zfp191	59057	zinc finger protein 191
A_52_P549223	-2.4407246	Mmp1a	83995	matrix metallopeptidase 1a (interstitial collagenase)
A_52_P94495	-2.1188922	Prkd3	75292	protein kinase D3
A_51_P125842	-2.3902042	Tmem51	214359	transmembrane protein 51
A_51_P489285	-2.4128091	Casc5	76464	cancer susceptibility candidate 5
A_52_P27918	-2.2291427	Atad5	237877	ATPase family, AAA domain containing 5
A_52_P891345	-2.957598
A_52_P226137	-3.0584083	Ulk2	29869	unc-51 like kinase 2
A_52_P1155674	-2.2213178
A_52_P56914	-3.4743404	Ccdc88a	108686	coiled coil domain containing 88A
A_52_P900990	-2.1801608
A_51_P263496	-3.7727964
A_51_P165500	-3.0660539
A_51_P509627	-2.6615171
A_51_P196174	-2.1751277
A_52_P201775	-4.210445
A_52_P682341	-2.805267	Magi3	99470	membrane associated guanylate kinase, WW and PDZ domain containing 3
A_52_P399945	-3.1036477	Nkrf	77286	NF-kappaB repressing factor
A_51_P326051	-2.1369293	Sppl2a	66552	signal peptide peptidase like 2A
A_52_P529980	-2.4957094	Cab39l	69008	calcium binding protein 39-like
A_51_P210138	-2.914462
A_52_P327854	-3.494533	Scaf4	224432	SR-related CTD-associated factor 4
A_52_P501586	-3.6903071
A_52_P513863	-2.1231747
A_51_P412027	-6.9398165	Cxcr6	80901	chemokine (C-X-C motif) receptor 6
A_52_P555583	-3.9158087
A_52_P207654	-3.7866855
A_51_P181341	-2.0174818	Necab2	117148	N-terminal EF-hand calcium binding protein 2
A_52_P255932	-4.4305387	Proser1	212127	proline and serine rich 1
A_51_P216990	-2.9730356	Olfr665	258810	olfactory receptor 665
A_52_P208946	-2.5557756
A_52_P963374	-2.8509638	Spire1	68166	spire homolog 1 (Drosophila)
A_52_P1172313	-2.2733693
A_52_P261268	-2.365016	Rttn	246102	rotatin
A_51_P349961	-3.2419612	Gc	14473	group specific component
A_51_P327491	-2.3347707	Apoa4	11808	apolipoprotein A-IV
A_52_P875936	-2.7182703
A_52_P988778	-2.6734939
A_52_P916243	-4.248244
A_52_P293248	-2.0758464	Dock4	238130	dedicator of cytokinesis 4
A_52_P260856	-2.0077326	Lpp	210126	LIM domain containing preferred translocation partner in lipoma
A_51_P453197	-2.3805065	Sept12	71089	septin 12
A_52_P325388	-2.697094	Ttc39c	72747	tetratricopeptide repeat domain 39C
A_51_P313397	-2.5965526	1700121C10Rik	67364	RIKEN cDNA 1700121C10 gene
A_52_P40327	-3.1675968	0610005C13Rik	71661	RIKEN cDNA 0610005C13 gene
A_51_P454152	-2.3509533	Ercc6	319955	excision repair cross-complementing rodent repair deficiency, complementation group 6
A_51_P409311	-2.0605402	Bpifb6	228796	BPI fold containing family B, member 6
A_52_P280443	-3.040618
A_51_P377342	-2.6278179	Cytip	227929	cytohesin 1 interacting protein
A_52_P523503	-2.826373	Tmem154	320782	transmembrane protein 154
A_52_P1067916	-2.6912217
A_52_P440284	-2.1776545	Mxra7	67622	matrix-remodelling associated 7
A_52_P560146	-3.2158227	Gm22	195209	predicted gene 22
A_52_P1140391	-4.3074427
A_51_P521052	-3.6049168	Ly6k	76486	lymphocyte antigen 6 complex, locus K
A_51_P197863	-2.2890036	Cacnb4	12298	calcium channel, voltage-dependent, beta 4 subunit
A_51_P378371	-3.3442237	Tpm1	22003	tropomyosin 1, alpha
A_51_P208240	-2.4413588	Tnfsf14	50930	tumor necrosis factor (ligand) superfamily, member 14
A_52_P936333	-4.2343597
A_52_P30312	-2.9696815	Ccr9	12769	chemokine (C-C motif) receptor 9
A_51_P338961	-2.0632226	Qser1	99003	glutamine and serine rich 1
A_51_P343996	-2.0592637
A_52_P140450	-2.3935938	Stk3	56274	serine/threonine kinase 3
A_52_P518213	-2.0738618	Helz	78455	helicase with zinc finger domain
A_51_P118468	-2.745451	Cep170	545389	centrosomal protein 170
A_51_P103298	-2.1210415	Zkscan2	210162	zinc finger with KRAB and SCAN domains 2
A_51_P337974	-2.9405727	Myoz3	170947	myozenin 3
A_52_P955846	-4.861697
A_52_P494168	-3.20628	Prr18	320111	proline rich region 18
A_52_P900390	-4.4079747	E030004H24Rik	319424	RIKEN cDNA E030004H24 gene
A_52_P1188723	-6.4049225
A_51_P228333	-5.4412622
A_52_P266312	-6.138057	8030498J20Rik	320389	RIKEN cDNA 8030498J20 gene
A_51_P197948	-2.1357808	Iws1	73473	IWS1 homolog (S. cerevisiae)
A_51_P417257	-3.7497046
A_52_P137331	-2.0371318	Slc35d1	242585	solute carrier family 35 (UDP-glucuronic acid/UDP-N-acetylgalactosamine dual transporter), member D1
A_52_P548680	-4.310559	Pik3c2a	18704	phosphatidylinositol 3-kinase, C2 domain containing, alpha polypeptide
A_51_P451632	-3.0718088	5031410I06Rik	381622	RIKEN cDNA 5031410I06 gene
A_51_P319888	-2.2274246	Pth2	114640	parathyroid hormone 2
A_52_P1140740	-2.5506444
A_51_P495259	-2.8528666	Traf6	22034	TNF receptor-associated factor 6
A_51_P343031	-2.9204004
A_52_P243627	-2.0302386	Gpr161	240888	G protein-coupled receptor 161
A_51_P378960	-2.81435	2810474O19Rik	67246	RIKEN cDNA 2810474O19 gene
A_52_P644210	-2.3539958	Cul9	78309	cullin 9
A_52_P427640	-2.99095
A_51_P413366	-2.0782242	Atrx	22589	alpha thalassemia/mental retardation syndrome X-linked homolog (human)
A_52_P165654	-2.6647782	Star	20845	steroidogenic acute regulatory protein
A_51_P401517	-2.6285489	Il24	93672	interleukin 24
A_51_P465888	-2.3873155
A_51_P310886	-2.01316
A_52_P514279	-3.3861213	Olfr318	258494	olfactory receptor 318
A_52_P612440	-2.1345654
A_52_P123956	-2.0004776	Polr3f	70408	polymerase (RNA) III (DNA directed) polypeptide F
A_52_P183071	-2.0154543	Rnf146	68031	ring finger protein 146
A_52_P963431	-2.24348
A_52_P527775	-4.2220063	Cyp2d10	13101	cytochrome P450, family 2, subfamily d, polypeptide 10
A_51_P241368	-2.000425
A_51_P413507	-2.2698116	2010109A12Rik	75610	RIKEN cDNA 2010109A12 gene
A_51_P161542	-3.3582776	Olfr512	258719	olfactory receptor 512
A_52_P185664	-2.269186	Nipal4	214112	NIPA-like domain containing 4
A_52_P68498	-2.678073
A_51_P148512	-2.4430962	Erbb2ip	59079	Erbb2 interacting protein
A_52_P237948	-2.0366058	Tm6sf1	107769	transmembrane 6 superfamily member 1
A_52_P152439	-2.3456197
A_52_P411192	-2.680534	Ccdc66	320234	coiled-coil domain containing 66
A_52_P590535	-2.0836906	Fbln2	14115	fibulin 2
A_51_P201835	-2.649332	Ttll8	239591	tubulin tyrosine ligase-like family, member 8
A_51_P402868	-2.9929423	Pla2g3	237625	phospholipase A2, group III
A_51_P127425	-2.0936205	Prpf4b	19134	PRP4 pre-mRNA processing factor 4 homolog B (yeast)
A_52_P324391	-2.4550405	2310058N22Rik	71921	RIKEN cDNA 2310058N22 gene
A_52_P730698	-2.2913568
A_52_P352099	-3.477797
A_52_P547273	-2.4904752	Dock4	238130	dedicator of cytokinesis 4
A_52_P263860	-6.1991754	D430030G11Rik	320665	RIKEN cDNA D430030G11 gene
A_52_P98000	-2.2628884
A_52_P655463	-2.8817859	Zhx3	320799	zinc fingers and homeoboxes 3
A_52_P553408	-2.4160132	D130060J10Rik	319595	RIKEN cDNA D130060J10 gene
A_52_P948927	-2.9536917
A_52_P464962	-3.0980225	Rbm5	83486	RNA binding motif protein 5
A_52_P244034	-2.4090903	Diablo	66593	diablo homolog (Drosophila)
A_52_P103319	-2.3766336
A_52_P373852	-2.049675	Foxo3	56484	forkhead box O3
A_52_P660158	-2.017253	Ano6	105722	anoctamin 6
A_52_P107783	-2.3894334
A_52_P316584	-3.4532506	Pot1b	72836	protection of telomeres 1B
A_52_P176608	-2.0390778
A_51_P296512	-2.5857642	Chm	12662	choroidermia
A_51_P362089	-7.561563	Lrrc3b	218763	leucine rich repeat containing 3B
A_52_P802796	-3.5597754
A_51_P243559	-2.168094	4833431D13Rik	268307	RIKEN cDNA 4833431D13 gene
A_52_P1180232	-4.323583
A_52_P136592	-2.2848635	Zfp775	243372	zinc finger protein 775
A_51_P499369	-2.6924896	Tmem184c	234463	transmembrane protein 184C
A_52_P1026875	-2.328721	Gnal	14680	guanine nucleotide binding protein, alpha stimulating, olfactory type
A_51_P410404	-2.002672
A_51_P317887	-2.0056343	Sectm1b	58210	secreted and transmembrane 1B
A_52_P183021	-2.1183448
A_52_P229744	-2.030037
A_52_P1028125	-2.9300094
A_51_P449194	-2.0429542	Ascc3	77987	activating signal cointegrator 1 complex subunit 3
A_51_P309347	-3.9684896	Nfasc	269116	neurofascin
A_51_P389575	-2.8704147
A_51_P116298	-2.656742	Slc17a9	228993	solute carrier family 17, member 9
A_52_P476635	-2.834843	Olfr373	258532	olfactory receptor 373
A_52_P892476	-4.3741503
A_52_P177732	-3.502723	Itch	16396	itchy, E3 ubiquitin protein ligase
A_52_P715601	-4.105991
A_52_P803182	-2.83198
A_51_P229477	-2.1435912	2900027M19Rik	72880	RIKEN cDNA 2900027M19 gene
A_52_P30406	-2.4454818	Rad23b	19359	RAD23b homolog (S. cerevisiae)
A_51_P327121	-2.801658	Was	22376	Wiskott-Aldrich syndrome homolog (human)
A_52_P550147	-2.2501602	Sned1	208777	sushi, nidogen and EGF-like domains 1
A_52_P771288	-2.3258455
A_51_P148122	-2.008033	Klhdc3	71765	kelch domain containing 3
A_52_P279391	-2.621185	Clock	12753	circadian locomotor output cycles kaput
A_51_P176365	-2.3067956	Gimap5	317757	GTPase, IMAP family member 5
A_51_P120097	-2.2467477	Ppp2r1b	73699	protein phosphatase 2 (formerly 2A), regulatory subunit A (PR 65), beta isoform
A_52_P747337	-2.7593534
A_52_P876147	-2.1810255	E030010N08Rik	381284	RIKEN cDNA E030010N08 gene
A_52_P172405	-2.1071131	A230046K03Rik	319277	RIKEN cDNA A230046K03 gene
A_52_P100909	-2.1281652	Celf2	14007	CUGBP, Elav-like family member 2
A_52_P214516	-2.2444956
A_52_P507498	-2.7919133	Plxnc1	54712	plexin C1
A_52_P102953	-2.6914477	2210018M11Rik	233545	RIKEN cDNA 2210018M11 gene
A_52_P1132033	-2.0753038
A_52_P478025	-3.027831	Smpd3	58994	sphingomyelin phosphodiesterase 3, neutral
A_51_P443693	-3.323373	Rasl10b	276952	RAS-like, family 10, member B
A_52_P558302	-2.3765094
A_51_P436977	-2.5290318	Duox2	214593	dual oxidase 2
A_51_P221512	-2.0532432	Ppp1r2	66849	protein phosphatase 1, regulatory (inhibitor) subunit 2
A_51_P144014	-2.1455357	Gdap5	14550	ganglioside-induced differentiation-associated-protein 5
A_51_P371635	-2.981698
A_52_P247614	-3.508081
A_52_P313523	-6.089379	4930452B06Rik	74430	RIKEN cDNA 4930452B06 gene
A_52_P317869	-3.6013134
A_52_P598732	-2.0480003	4930523C07Rik	67647	RIKEN cDNA 4930523C07 gene
A_51_P143031	-2.9834263	Eps8l3	99662	EPS8-like 3
A_52_P477386	-2.2976933
A_51_P482128	-2.229451	Krt15	16665	keratin 15
A_52_P429213	-4.1605444	Synj2bp	24071	synaptojanin 2 binding protein
A_52_P819877	-2.577401
A_52_P207335	-2.0126278	Tmem246	67063	transmembrane protein 246
A_52_P237357	-3.155706
A_51_P250590	-2.1432245	Sbf2	319934	SET binding factor 2
A_51_P167535	-2.8134384	Fabp3	14077	fatty acid binding protein 3, muscle and heart
A_51_P362298	-2.579017	Tmprss3	140765	transmembrane protease, serine 3
A_52_P56636	-2.5848765	Chia	81600	chitinase, acidic
A_52_P255125	-2.2173963	Rnf170	77733	ring finger protein 170
A_51_P142499	-2.4504201
A_51_P140769	-2.0589452	Syn3	27204	synapsin III
A_52_P739714	-5.827146
A_52_P66833	-2.4539945
A_51_P482820	-2.9542975	Chrne	11448	cholinergic receptor, nicotinic, epsilon polypeptide
A_52_P59801	-2.1741197	Fry	320365	furry homolog (Drosophila)
A_52_P210011	-2.190327	March2	224703	membrane-associated ring finger (C3HC4) 2
A_52_P557940	-2.3890095	Rbm4b	66704	RNA binding motif protein 4B
A_51_P311820	-2.3510523	Mgmt	17314	O-6-methylguanine-DNA methyltransferase
A_52_P340187	-4.041427	Pon2	330260	paraoxonase 2
A_52_P287887	-2.813164	9930017N22Rik	320403	RIKEN cDNA 9930017N22 gene
A_51_P396325	-2.0739665	Syn2	20965	synapsin II
A_51_P174275	-2.2338765	Colec11	71693	collectin sub-family member 11
A_52_P360963	-3.129372	Prr12	233210	proline rich 12
A_52_P557059	-2.0838697	Olfr536	258513	olfactory receptor 536
A_52_P620497	-2.1073987	9630019E01Rik	319967	RIKEN cDNA 9630019E01 gene
A_51_P199772	-2.5923965	Sprtn	244666	SprT-like N-terminal domain
A_52_P138906	-2.234072
A_51_P346132	-2.1841896	Rhox9	104384	reproductive homeobox 9
A_52_P175316	-2.2034764	Rictor	78757	RPTOR independent companion of MTOR, complex 2
A_52_P604345	-2.5518026
A_51_P378210	-2.72577	Guca2a	14915	guanylate cyclase activator 2a (guanylin)
A_52_P9600	-4.336305
A_51_P295085	-2.2043557	Ogn	18295	osteoglycin
A_52_P42069	-2.4861076	Prokr1	58182	prokineticin receptor 1
A_52_P415735	-2.370585	Zfp53	24132	zinc finger protein 53
A_52_P803668	-4.8757043	Mplkip	66308	M-phase specific PLK1 intereacting protein
A_52_P1115466	-2.210036	Eif4enif1	74203	eukaryotic translation initiation factor 4E nuclear import factor 1
A_52_P489220	-2.2536364	Pde4a	18577	phosphodiesterase 4A, cAMP specific
A_52_P980445	-2.254572	D930021H04Rik	399575	RIKEN cDNA D930021H04 gene
A_52_P222544	-2.2924674	C530043A13Rik	319357	RIKEN cDNA C530043A13 gene
A_52_P375970	-2.3204646	Piezo2	667742	piezo-type mechanosensitive ion channel component 2
A_52_P739182	-3.3077147
A_51_P259975	-2.7063003	Aspa	11484	aspartoacylase
A_52_P57317	-2.9974258	Fam19a3	329731	family with sequence similarity 19, member A3
A_52_P327506	-2.6615584	Itgb3bp	67733	integrin beta 3 binding protein (beta3-endonexin)
A_52_P279379	-2.8671436	Zcchc11	230594	zinc finger, CCHC domain containing 11
A_52_P413826	-2.4907296
A_51_P445545	-3.3950927
A_51_P282538	-2.072078	Gad1	14415	glutamate decarboxylase 1
A_52_P907928	-2.221819
A_51_P348154	-2.312464	Olfr1317	258440	olfactory receptor 1317
A_52_P850931	-2.933593	E430022E14Rik	402745	RIKEN cDNA E430022E14 gene
A_52_P1132360	-2.2520695
A_52_P254095	-2.731661	Cd200	17470	CD200 antigen
A_52_P706621	-3.0719454	Tsc22d2	72033	TSC22 domain family, member 2
A_51_P354513	-3.7816198	A430027C01Rik	97545	RIKEN cDNA A430027C01 gene
A_51_P469595	-4.2091713
A_52_P536896	-2.1998541
A_52_P408647	-3.3411736	Zfp157	72154	zinc finger protein 157
A_52_P1099896	-2.0180225
A_51_P419335	-2.0979507	Foxb2	14240	forkhead box B2
A_52_P185876	-2.9797091	Trps1	83925	trichorhinophalangeal syndrome I (human)
A_52_P674444	-2.758598	Cenpc1	12617	centromere protein C1
A_51_P247472	-2.4804602
A_51_P407704	-2.374632	Wap	22373	whey acidic protein
A_51_P162366	-5.635048
A_51_P182490	-2.800507	Atg2b	76559	autophagy related 2B
A_52_P7406	-2.1383274	Vps37a	52348	vacuolar protein sorting 37A (yeast)
A_52_P218584	-2.095103
A_51_P361328	-2.4519265
A_51_P153423	-2.8016229	Fndc1	68655	fibronectin type III domain containing 1
A_51_P227445	-2.338432
A_52_P398941	-3.1658897
A_52_P686231	-3.4652438	A530020G20Rik	319839	RIKEN cDNA A530020G20 gene
A_52_P511858	-2.906341	Mast4	328329	microtubule associated serine/threonine kinase family member 4
A_51_P233320	-4.4680905
A_51_P107901	-2.9290893	H2afz	51788	H2A histone family, member Z
A_51_P189358	-4.471499	4922501L14Rik	209601	RIKEN cDNA 4922501L14 gene
A_51_P325552	-2.425265	Spert	67926	spermatid associated
A_51_P407849	-2.0929852	4930502C15Rik	320733	RIKEN cDNA 4930502C15 gene
A_51_P318830	-8.056764	Syt10	54526	synaptotagmin X
A_51_P184184	-5.5790577	Cntfr	12804	ciliary neurotrophic factor receptor
A_51_P503736	-2.1402245	Tex19.2	70956	testis expressed gene 19.2
A_52_P465964	-2.4110725	Txndc15	69672	thioredoxin domain containing 15
A_51_P292490	-2.011811	Ttbk2	140810	tau tubulin kinase 2
A_51_P422457	-2.026544	Plcl1	227120	phospholipase C-like 1
A_52_P410859	-2.2892678	B3gntl1	210004	UDP-GlcNAc:betaGal beta-1,3-N-acetylglucosaminyltransferase-like 1
A_52_P498718	-2.4003448
A_52_P834965	-2.1514034
A_51_P379385	-2.51154	Abca8a	217258	ATP-binding cassette, sub-family A (ABC1), member 8a
A_51_P432069	-3.3773072	Trrap	100683	transformation/transcription domain-associated protein
A_52_P625600	-2.2669609	N4bp2	333789	NEDD4 binding protein 2
A_52_P739414	-2.792564
A_51_P516219	-2.2876196
A_52_P80965	-2.2590652	Sephs1	109079	selenophosphate synthetase 1
A_51_P109933	-2.1885622	Tekt2	24084	tektin 2
A_52_P1027662	-2.513563
A_52_P606246	-4.3796062	5730522E02Rik	70626	RIKEN cDNA 5730522E02 gene
A_52_P643762	-2.1054332
A_51_P279038	-2.1229045	Ppargc1a	19017	peroxisome proliferative activated receptor, gamma, coactivator 1 alpha
A_51_P471798	-2.2328174	Ppig	228005	peptidyl-prolyl isomerase G (cyclophilin G)
A_51_P336070	-3.0844517	Lctl	235435	lactase-like
A_52_P366251	-3.5453053	Dock5	68813	dedicator of cytokinesis 5
A_52_P235347	-3.3310921	Fgf21	56636	fibroblast growth factor 21
A_52_P502919	-2.049635	Ahdc1	230793	AT hook, DNA binding motif, containing 1
A_52_P142912	-2.3948326	Pfkfb2	18640	6-phosphofructo-2-kinase/fructose-2,6-biphosphatase 2
A_51_P383638	-2.0393693	Amy1	11722	amylase 1, salivary
A_52_P151256	-2.2400563	Mcc	328949	mutated in colorectal cancers
A_52_P290391	-2.2283945	Vti1a	53611	vesicle transport through interaction with t-SNAREs 1A
A_51_P303728	-2.1814408	Zfp277	246196	zinc finger protein 277
A_52_P685181	-2.2491086	A430106A12Rik	68164	RIKEN cDNA A430106A12 gene
A_52_P34979	-2.6761696	Epc1	13831	enhancer of polycomb homolog 1 (Drosophila)
A_52_P558013	-2.106238	5730409L17Rik	70499	RIKEN cDNA 5730409L17 gene
A_52_P218623	-3.537729
A_51_P257175	-2.8562098	Krt76	77055	keratin 76
A_51_P111293	-2.0714762	Il1f8	69677	interleukin 1 family, member 8
A_52_P957260	-2.476805
A_52_P568257	-2.3374584	Sort1	20661	sortilin 1
A_52_P646762	-2.0741308	Smoc2	64074	SPARC related modular calcium binding 2
A_52_P841	-2.0764322	Zbtb10	229055	zinc finger and BTB domain containing 10
A_52_P425317	-2.2489185	4933406C10Rik	74076	RIKEN cDNA 4933406C10 gene
A_51_P390739	-2.465827	Tjp1	21872	tight junction protein 1
A_52_P242194	-2.0693421	Tube1	71924	epsilon-tubulin 1
A_52_P8743	-3.278666	Vezt	215008	vezatin, adherens junctions transmembrane protein
A_52_P859846	-2.1689565
A_52_P567219	-2.2158313
A_51_P266940	-2.604927	Zc2hc1c	72350	zinc finger, C2HC-type containing 1C
A_51_P388587	-2.3287764	AY036118	170798	cDNA sequence AY036118
A_51_P404478	-2.6046603	Oscar	232790	osteoclast associated receptor
A_52_P714654	-2.1666014	8030488J09Rik	77504	RIKEN cDNA 8030488J09 gene
A_51_P239807	-3.627297
A_52_P562704	-2.5689652	Slc8a1	20541	solute carrier family 8 (sodium/calcium exchanger), member 1
A_52_P439407	-2.1638558	Sema3e	20349	sema domain, immunoglobulin domain (Ig), short basic domain, secreted, (semaphorin) 3E
A_52_P585652	-2.0448916	Fndc3b	72007	fibronectin type III domain containing 3B
A_52_P411015	-2.4374566	B130040O20Rik	320962	RIKEN cDNA B130040O20 gene
A_52_P110982	-2.553609	App	11820	amyloid beta (A4) precursor protein
A_51_P474498	-2.4438047	Tac4	93670	tachykinin 4
A_52_P1050743	-2.4113622	1110035E04Rik	68672	RIKEN cDNA 1110035E04 gene
A_51_P344770	-2.4036777	Tnrc6b	213988	trinucleotide repeat containing 6b
A_51_P281009	-2.3206234	Fam49b	223601	family with sequence similarity 49, member B
A_52_P550325	-2.6125154	Kcnj16	16517	potassium inwardly-rectifying channel, subfamily J, member 16
A_52_P172798	-4.7677193
A_52_P614910	-2.5216715	Rsbn1l	242860	round spermatid basic protein 1-like
A_52_P324848	-2.3586986	Cep41	83922	centrosomal protein 41
A_52_P134830	-2.3369515	Huwe1	59026	HECT, UBA and WWE domain containing 1
A_51_P500474	-2.6423292
A_51_P508474	-3.3370173	Olfr103	258830	olfactory receptor 103
A_51_P459974	-2.3984814	Lmo7	380928	LIM domain only 7
A_52_P639860	-2.059777
A_52_P389553	-3.7258754
A_51_P315272	-2.484535
A_51_P335729	-2.3386493
A_52_P286605	-3.449387	Phf20l1	239510	PHD finger protein 20-like 1
A_51_P419801	-2.131184
A_52_P1019566	-3.2485018
A_52_P284652	-3.6968696	Wrb	71446	tryptophan rich basic protein
A_52_P727235	-8.155508	Trabd2b	666048	TraB domain containing 2B
A_52_P883560	-2.119566
A_51_P268944	-2.06072	Itga1	109700	integrin alpha 1
A_52_P65237	-2.685964	Zbtb7c	207259	zinc finger and BTB domain containing 7C
A_51_P301416	-2.2684743
A_51_P104430	-2.6276565	Magee1	107528	melanoma antigen, family E, 1
A_51_P264866	-2.3822663	Olfr1395	258877	olfactory receptor 1395
A_52_P84234	-2.446366	Map4k2	26412	mitogen-activated protein kinase kinase kinase kinase 2
A_52_P148389	-2.726614
A_52_P376183	-3.6712563	A830010M20Rik	231570	RIKEN cDNA A830010M20 gene
A_51_P131168	-2.0377965	Ccdc55	237859	coiled-coil domain containing 55
A_52_P442852	-2.1240304	Kbtbd7	211255	kelch repeat and BTB (POZ) domain containing 7
A_51_P209451	-2.5474253	Zbtb24	268294	zinc finger and BTB domain containing 24
A_52_P923039	-2.7401485
A_52_P907176	-2.483636
A_52_P634176	-2.4239292	Sox5	20678	SRY-box containing gene 5
A_52_P653456	-2.557525
A_51_P244333	-2.1863065	Eif2a	229317	eukaryotic translation initiation factor 2A
A_52_P523445	-2.264737	Cdhr5	72040	cadherin-related family member 5
A_52_P771575	-4.786169
A_52_P153522	-2.0504506	Crisp4	78081	cysteine-rich secretory protein 4
A_52_P81533	-2.0356631	LOC101056373	101056373	uncharacterized LOC101056373
A_52_P264458	-3.1715457
A_52_P666698	-3.1020052
A_52_P51936	-2.1574488	D430022A14Rik	319691	RIKEN cDNA D430022A14 gene
A_52_P599789	-2.7315614	Qrich2	217341	glutamine rich 2
A_52_P73208	-2.226956	Acad9	229211	acyl-Coenzyme A dehydrogenase family, member 9
A_52_P12023	-3.2762713
A_52_P533817	-2.4586296	Barx2	12023	BarH-like homeobox 2
A_52_P86679	-2.9389307	Zfp292	30046	zinc finger protein 292
A_52_P46410	-2.1384206	Uvssa	71101	UV stimulated scaffold protein A
A_52_P644903	-3.1216843	Api5	11800	apoptosis inhibitor 5
A_52_P587928	-3.3297439	Zeb2	24136	zinc finger E-box binding homeobox 2
A_51_P426837	-2.7246783	8030411F24Rik	78609	RIKEN cDNA 8030411F24 gene
A_52_P427405	-2.1322145	A130099P19Rik	319978	RIKEN cDNA A130099P19 gene
A_52_P258374	-8.043715	Cul4a	99375	cullin 4A
A_52_P255618	-2.6329181	Tma16	66282	translation machinery associated 16 homolog (S. cerevisiae)
A_52_P843941	-2.1850944
A_51_P397968	-2.518885
A_51_P212342	-3.2775426	Ndufv2	72900	NADH dehydrogenase (ubiquinone) flavoprotein 2
A_51_P358012	-3.346511	Serpina3m	20717	serine (or cysteine) peptidase inhibitor, clade A, member 3M
A_52_P405652	-2.0808413	Ermp1	226090	endoplasmic reticulum metallopeptidase 1
A_52_P117352	-2.5836143	Gja4	14612	gap junction protein, alpha 4
A_51_P363791	-2.1469269	Ap3m1	55946	adaptor-related protein complex 3, mu 1 subunit
A_52_P46688	-2.0232372
A_52_P117892	-2.0603204	Pde7a	18583	phosphodiesterase 7A
A_52_P883243	-2.5250473	Smug1	71726	single-strand selective monofunctional uracil DNA glycosylase
A_52_P739307	-2.2708766	D230014I24Rik	319391	RIKEN cDNA D230014I24 gene
A_51_P233707	-2.0448565	Ccdc55	237859	coiled-coil domain containing 55
A_52_P1108190	-3.5401382
A_52_P665723	-2.1146293	D5Ertd579e	320661	DNA segment, Chr 5, ERATO Doi 579, expressed
A_52_P1027847	-2.3087652
A_51_P341746	-3.0791762	Mpl	17480	myeloproliferative leukemia virus oncogene
A_52_P875385	-2.6059604
A_52_P456779	-2.1836426	Gm16794	100504734	predicted gene, 16794
A_51_P411575	-2.1076982
A_52_P435561	-2.0316105	Prr15l	217138	proline rich 15-like
A_51_P473979	-2.1162472
A_52_P543947	-2.2624617	Cep164	214552	centrosomal protein 164
A_52_P61893	-2.0686176	Nono	53610	non-POU-domain-containing, octamer binding protein
A_52_P1131666	-3.4079468
A_52_P448435	-2.4061205
A_52_P771132	-2.0649998
A_52_P16482	-2.0728729	Cacnb4	12298	calcium channel, voltage-dependent, beta 4 subunit
A_52_P130639	-2.1354642	Aipl1	114230	aryl hydrocarbon receptor-interacting protein-like 1
A_52_P360650	-2.3166506	Abcb7	11306	ATP-binding cassette, sub-family B (MDR/TAP), member 7
A_51_P442091	-3.250601	Snx13	217463	sorting nexin 13
A_51_P294131	-2.6845593	8430437B07Rik	71507	RIKEN cDNA 8430437B07 gene
A_52_P915626	-2.7309084
A_52_P786930	-2.1660013
A_52_P1036554	-2.0000856	Usp15	14479	ubiquitin specific peptidase 15
A_52_P395819	-2.541804
A_51_P138923	-2.1109738	Peg12	27412	paternally expressed 12
A_51_P412526	-2.0014653	Marf1	223989	meiosis arrest female 1
A_52_P504996	-2.9113941	Trpc4ap	56407	transient receptor potential cation channel, subfamily C, member 4 associated protein
A_51_P310164	-2.3990092	2810459M11Rik	72792	RIKEN cDNA 2810459M11 gene
A_51_P335329	-2.2134385
A_51_P262374	-5.3652973
A_51_P329975	-2.01275	Ninj2	29862	ninjurin 2
A_52_P89125	-2.9123132	Brd8	78656	bromodomain containing 8
A_52_P463373	-3.4790123	Cd37	12493	CD37 antigen
A_51_P516268	-2.5490053	Kctd4	67516	potassium channel tetramerisation domain containing 4
A_52_P352362	-2.2678952	Gm7265	639396	predicted gene 7265
A_52_P891818	-3.0448534
A_52_P85174	-2.1367967	Tlr3	142980	toll-like receptor 3
A_51_P209782	-2.1564546	Cyp2c44	226143	cytochrome P450, family 2, subfamily c, polypeptide 44
A_52_P231170	-2.1204531	Megf9	230316	multiple EGF-like-domains 9
A_52_P172416	-2.597398
A_52_P255099	-2.5537977	Slc34a2	20531	solute carrier family 34 (sodium phosphate), member 2
A_51_P358787	-2.329066	Olfr48	18347	olfactory receptor 48
A_51_P352232	-2.4418943	Ppt1	19063	palmitoyl-protein thioesterase 1
A_51_P479519	-2.3344965	Itgb8	320910	integrin beta 8
A_51_P356241	-2.2958448	9530085L02Rik	442822	RIKEN cDNA 9530085L02 gene
A_52_P248804	-4.3895707	Gpr142	217302	G protein-coupled receptor 142
A_52_P657883	-2.014309	Zcchc8	70650	zinc finger, CCHC domain containing 8
A_51_P153683	-2.7240427	Lrrc26	227618	leucine rich repeat containing 26
A_52_P445778	-3.1195612	Atr	245000	ataxia telangiectasia and Rad3 related
A_51_P191034	-2.572784
A_51_P117640	-3.1131468	5830468F06Rik	76082	RIKEN cDNA 5830468F06 gene
A_51_P291906	-3.1658735	Tlr3	142980	toll-like receptor 3
A_52_P499551	-3.6249657	Celf2	14007	CUGBP, Elav-like family member 2
A_51_P475628	-2.039992	Paqr6	68957	progestin and adipoQ receptor family member VI
A_52_P277244	-3.7348273	Gtpbp8	66067	GTP-binding protein 8 (putative)
A_51_P329569	-2.2238824
A_52_P501875	-2.8539412	Ccdc173	75051	coiled-coil domain containing 173
A_52_P150588	-2.1248634	Snrpd3	67332	small nuclear ribonucleoprotein D3
A_52_P1116491	-2.137955
A_52_P46665	-4.281433
A_51_P147213	-2.0672185	3300002I08Rik	69277	RIKEN cDNA 3300002I08 gene
A_52_P1188218	-2.3342211
A_51_P176396	-2.3933985	Ahcyl2	74340	S-adenosylhomocysteine hydrolase-like 2
A_52_P11367	-2.2764175	Tex9	21778	testis expressed gene 9
A_51_P361675	-2.021382	Dopey1	320615	dopey family member 1
A_52_P113566	-2.0831053	Lats1	16798	large tumor suppressor
A_51_P488333	-2.2629251	A130022F02Rik	320441	RIKEN cDNA A130022F02 gene
A_52_P311392	-3.4137378
A_52_P939844	-3.6890967
A_52_P748461	-3.687161
A_52_P867313	-2.167084
A_52_P526607	-2.009915	A730017C20Rik	225583	RIKEN cDNA A730017C20 gene
A_51_P291306	-2.8847775	5730575I04Rik	70649	RIKEN cDNA 5730575I04 gene
A_52_P290221	-2.0416088	Zfp182	319535	zinc finger protein 182
A_52_P554703	-3.6026163	Gprin3	243385	GPRIN family member 3
A_52_P124074	-2.250534	Efr3a	76740	EFR3 homolog A (S. cerevisiae)
A_52_P1100434	-3.2195342
A_52_P189279	-3.217896
A_51_P248786	-2.1473157	Ccdc80	67896	coiled-coil domain containing 80
A_52_P124137	-2.8526409	E330013P04Rik	107376	RIKEN cDNA E330013P04 gene
A_52_P1100661	-2.176252
A_52_P209852	-2.200441	Itch	16396	itchy, E3 ubiquitin protein ligase
A_51_P450376	-2.469458	Mmp24	17391	matrix metallopeptidase 24
A_51_P315925	-2.429197	Fgf21	56636	fibroblast growth factor 21
A_51_P101034	-2.11039
A_51_P501396	-2.1534224	Trpm7	58800	transient receptor potential cation channel, subfamily M, member 7
A_51_P369478	-4.1779637	Ppp2r5e	26932	protein phosphatase 2, regulatory subunit B (B56), epsilon isoform
A_51_P432271	-2.377377
A_52_P73374	-2.0901854	Vta1	66201	Vps20-associated 1 homolog (S. cerevisiae)
A_52_P739394	-2.5551405	A530041M06Rik	100503209	RIKEN cDNA A530041M06 gene
A_52_P1036395	-3.0292165
A_52_P172303	-3.498338
A_51_P489909	-3.3555453	Smc5	226026	structural maintenance of chromosomes 5
A_51_P241935	-2.0290937	Prss30	30943	protease, serine, 30
A_52_P341339	-2.7667122	Sos1	20662	son of sevenless homolog 1 (Drosophila)
A_52_P147933	-4.611754
A_52_P443602	-2.1786387	4932438A13Rik	229227	RIKEN cDNA 4932438A13 gene
A_51_P271091	-2.803001	A130072N09Rik	319271	RIKEN cDNA A130072N09 gene
A_51_P432950	-2.2128434	Sstr1	20605	somatostatin receptor 1
A_52_P284298	-2.6293046	Krtap5-3	77215	keratin associated protein 5-3
A_51_P483544	-2.6362479	Aass	30956	aminoadipate-semialdehyde synthase
A_51_P507065	-3.5757058	Celsr3	107934	cadherin, EGF LAG seven-pass G-type receptor 3 (flamingo homolog, Drosophila)
A_52_P1092136	-3.7332141	Braf	109880	Braf transforming gene
A_51_P371965	-3.1648023	Psmd14	59029	proteasome (prosome, macropain) 26S subunit, non-ATPase, 14
A_52_P787196	-2.4129713
A_52_P566653	-2.8892035	Wnk1	232341	WNK lysine deficient protein kinase 1
A_51_P241213	-4.110545	A030005L19Rik	77922	RIKEN cDNA A030005L19 gene
A_52_P818	-2.939445
A_52_P177661	-2.450098	Cwf19l2	244672	CWF19-like 2, cell cycle control (S. pombe)
A_52_P501447	-2.1149948	Gm7072	631624	predicted gene 7072
A_52_P508700	-3.2754028	Zfp951	626391	zinc finger protein 951
A_51_P418016	-3.17533	Ccnj	240665	cyclin J
A_52_P199280	-2.1276815	Lin54	231506	lin-54 homolog (C. elegans)
A_52_P258250	-2.4929774	B230217O12Rik	320879	RIKEN cDNA B230217O12 gene
A_51_P350817	-2.5294228	Cnn1	12797	calponin 1
A_52_P184414	-2.8611095	Qrfp	227717	pyroglutamylated RFamide peptide
A_51_P359525	-3.6294823	Olfr449	259067	olfactory receptor 449
A_52_P619287	-2.160007	Gm2373	100039691	predicted gene 2373
A_52_P241917	-2.2244236	Tank	21353	TRAF family member-associated Nf-kappa B activator
A_51_P424603	-2.0553439	Ppfia1	233977	protein tyrosine phosphatase, receptor type, f polypeptide (PTPRF), interacting protein (liprin), alpha 1
A_52_P545181	-2.5002294	Caln1	140904	calneuron 1
A_52_P755439	-3.0543895	Anp32b	67628	acidic (leucine-rich) nuclear phosphoprotein 32 family, member B
A_52_P732433	-3.0801215
A_52_P37517	-2.0384102	Smarce1	57376	SWI/SNF related, matrix associated, actin dependent regulator of chromatin, subfamily e, member 1
A_52_P260570	-2.2426023	Add2	11519	adducin 2 (beta)
A_52_P411116	-2.242432
A_52_P691533	-3.1347005
A_51_P240077	-2.6644938	1700092C17Rik	74295	RIKEN cDNA 1700092C17 gene
A_51_P119429	-5.621748	Nckap1l	105855	NCK associated protein 1 like
A_52_P337910	-3.2226727
A_52_P524912	-2.844579
A_51_P428730	-2.4549875
A_51_P272754	-2.6027925	Cdh18	320865	cadherin 18
A_51_P381409	-2.02142	Vil1	22349	villin 1
A_52_P130578	-2.683338
A_52_P45616	-4.0851455	Emilin3	280635	elastin microfibril interfacer 3
A_52_P557113	-3.8014603	Utrn	22288	utrophin
A_52_P671529	-2.0251467	Zmat1	215693	zinc finger, matrin type 1
A_51_P301537	-3.0547385	Tmem217	71138	transmembrane protein 217
A_52_P860150	-3.4217153
A_52_P811644	-2.759229
A_51_P416846	-2.061237	2610020H08Rik	434234	RIKEN cDNA 2610020H08 gene
A_51_P385653	-2.3118722	Fam122b	78755	family with sequence similarity 122, member B
A_51_P451498	-2.8993478
A_52_P655221	-2.0375533
A_52_P180692	-2.0834756	Mrpl27	94064	mitochondrial ribosomal protein L27
A_51_P143212	-2.3633296	Smc4	70099	structural maintenance of chromosomes 4
A_52_P932234	-2.3475664
A_52_P37091	-2.0298657	Magi1	14924	membrane associated guanylate kinase, WW and PDZ domain containing 1
A_51_P323418	-2.194692
A_51_P480320	-3.3081818	Usp24	329908	ubiquitin specific peptidase 24
A_51_P147445	-3.156793	Lrrc28	67867	leucine rich repeat containing 28
A_52_P1116376	-2.4572103	Phf21a	192285	PHD finger protein 21A
A_51_P237206	-3.4289565	Utf1	22286	undifferentiated embryonic cell transcription factor 1
A_52_P629849	-2.7042298	Zfp42	22702	zinc finger protein 42
A_52_P971616	-2.9059975	Airn	104103	antisense Igf2r RNA
A_52_P707934	-4.9019313
A_52_P835116	-3.6302276
A_51_P113825	-2.0289786	9430091E24Rik	434350	RIKEN cDNA 9430091E24 gene
A_52_P653303	-2.4975123
A_51_P404447	-2.3899784
A_51_P221661	-3.1788359	Smarca5	93762	SWI/SNF related, matrix associated, actin dependent regulator of chromatin, subfamily a, member 5
A_52_P208703	-3.102639	Ubap2l	74383	ubiquitin associated protein 2-like
A_52_P190878	-2.6171908
A_51_P178705	-2.7844803	Olfr1093	258363	olfactory receptor 1093
A_51_P129160	-3.23429	Hectd1	207304	HECT domain containing 1
A_51_P300960	-2.6075764	Tti2	234138	TELO2 interacting protein 2
A_52_P300971	-2.1202688	Capn3	12335	calpain 3
A_51_P138909	-2.1614347	H60c	670558	histocompatibility 60c
A_52_P158618	-3.4969602	Hspa13	110920	heat shock protein 70 family, member 13
A_52_P546276	-2.652234	Fhl2	14200	four and a half LIM domains 2
A_51_P429252	-3.1346266	Prok2	50501	prokineticin 2
A_51_P167932	-2.3948152	E230019M04Rik	331537	RIKEN cDNA E230019M04 gene
A_52_P397444	-2.2534485	Pdzd8	107368	PDZ domain containing 8
A_52_P716154	-2.1337483
A_51_P507253	-4.584273
A_52_P107681	-2.6865444	Ylpm1	56531	YLP motif containing 1
A_52_P15377	-2.100688	Wnt9b	22412	wingless-type MMTV integration site 9B
A_51_P395686	-2.8253117	5830405M20Rik	74749	RIKEN cDNA 5830405M20 gene
A_52_P939541	-2.0400283
A_51_P228452	-3.0365813
A_52_P630806	-2.605111	Tac1	21333	tachykinin 1
A_52_P577180	-4.1144876	Jak1	16451	Janus kinase 1
A_52_P150654	-4.229313	Snx32	225861	sorting nexin 32
A_52_P561296	-2.170417	Tmem135	72759	transmembrane protein 135
A_51_P139320	-2.3536763	Pcbd1	13180	pterin 4 alpha carbinolamine dehydratase/dimerization cofactor of hepatocyte nuclear factor 1 alpha (TCF1) 1
A_52_P175066	-2.2284434	Cd2ap	12488	CD2-associated protein
A_52_P851171	-2.5033395
A_52_P321244	-3.305276	4930544M13Rik	75161	RIKEN cDNA 4930544M13 gene
A_52_P524227	-2.1700194	Olfr149	235256	olfactory receptor 149
A_52_P313713	-2.0320694	Thoc7	66231	THO complex 7 homolog (Drosophila)
A_52_P508163	-2.3304935
A_51_P432820	-2.2121496
A_52_P585224	-2.1500473
A_51_P100505	-2.582953
A_52_P980224	-3.0511358
A_52_P955235	-2.9161646
A_51_P130115	-2.8479035	Spink2	69982	serine peptidase inhibitor, Kazal type 2
A_51_P230206	-2.5416172
A_52_P794661	-2.0086071
A_52_P286288	-5.3194656	Olfr474	258488	olfactory receptor 474
A_52_P102260	-2.2562442	Ccdc151	77609	coiled-coil domain containing 151
A_51_P425783	-2.538354
A_52_P358360	-3.220589	Ighm	16019	immunoglobulin heavy constant mu
A_51_P494751	-2.041149	Mael	98558	maelstrom homolog (Drosophila)
A_52_P1181142	-2.9210835
A_52_P483799	-2.059167	Pydc4	623121	pyrin domain containing 4
A_51_P519108	-2.0255435	Dzank1	241688	double zinc ribbon and ankyrin repeat domains 1
A_51_P434910	-2.8444464	Myl3	17897	myosin, light polypeptide 3
A_52_P140177	-2.5348394	Pbx3	18516	pre B cell leukemia homeobox 3
A_52_P706912	-3.6297033	Phka1	18679	phosphorylase kinase alpha 1
A_51_P196113	-2.230007	Mast1	56527	microtubule associated serine/threonine kinase 1
A_51_P122030	-2.0197465	Olfr154	27216	olfactory receptor 154
A_52_P328867	-4.027337	Prkcb	18751	protein kinase C, beta
A_51_P470542	-2.195927	Apob	238055	apolipoprotein B
A_52_P1179609	-2.3705225	Kcnh3	16512	potassium voltage-gated channel, subfamily H (eag-related), member 3
A_51_P147493	-3.1278317
A_51_P180874	-2.5810258
A_51_P177371	-2.4091184	Prnd	26434	prion protein dublet
A_51_P342189	-2.473689
A_51_P478930	-2.381368
A_52_P538363	-2.757467	Pcdhb2	93873	protocadherin beta 2
A_52_P671029	-2.4271336	Col11a1	12814	collagen, type XI, alpha 1
A_52_P663027	-2.9516287	Stat5b	20851	signal transducer and activator of transcription 5B
A_51_P115895	-2.528235	Olfr800	258541	olfactory receptor 800
A_52_P368434	-2.9690018	Zfp354a	21408	zinc finger protein 354A
A_51_P363461	-2.2238288	4833414E09Rik	71633	RIKEN cDNA 4833414E09 gene
A_52_P140287	-2.791996	Spn	20737	sialophorin
A_52_P1083818	-2.8709505
A_52_P253757	-2.706134	Nlrp1a	195046	NLR family, pyrin domain containing 1A
A_51_P373970	-4.025044	Braf	109880	Braf transforming gene
A_52_P477668	-2.6359577	Srgap1	117600	SLIT-ROBO Rho GTPase activating protein 1
A_52_P292882	-2.1430852	Dap3	65111	death associated protein 3
A_51_P264644	-3.1513004	9530018H14Rik	77395	RIKEN cDNA 9530018H14 gene
A_52_P239976	-2.852917	Cacna1i	239556	calcium channel, voltage-dependent, alpha 1I subunit
A_51_P512293	-2.8999636	Gm7789	665798	predicted pseudogene 7789
A_52_P1091891	-2.266975
A_52_P218188	-2.1466453	Abcc8	20927	ATP-binding cassette, sub-family C (CFTR/MRP), member 8
A_51_P146593	-2.1481135	Olfr508	258769	olfactory receptor 508
A_52_P631240	-2.976525	Frmd4a	209630	FERM domain containing 4A
A_52_P135198	-2.2541478	4833444G19Rik	320047	RIKEN cDNA 4833444G19 gene
A_51_P337210	-2.4592025	Lrrc4	192198	leucine rich repeat containing 4
A_51_P386625	-2.3843648	Epx	13861	eosinophil peroxidase
A_52_P350138	-2.1854963
A_51_P157677	-2.780716	Pdlim3	53318	PDZ and LIM domain 3
A_52_P95096	-2.840765	1700025L06Rik	66933	RIKEN cDNA 1700025L06 gene
A_51_P358052	-2.10156
A_52_P127569	-2.4201	Pigg	433931	phosphatidylinositol glycan anchor biosynthesis, class G
A_52_P525348	-2.3593864
A_52_P1140007	-2.708801	Taf1a	21339	TATA box binding protein (Tbp)-associated factor, RNA polymerase I, A
A_52_P708235	-4.329184
A_51_P190979	-2.1037772	Olfr1166	258644	olfactory receptor 1166
A_51_P208555	-2.196782	Decr1	67460	2,4-dienoyl CoA reductase 1, mitochondrial
A_52_P516962	-2.0737674	Olfr1328	258394	olfactory receptor 1328
A_51_P444401	-2.6556022
A_51_P232913	-2.5357206	Cpt1b	12895	carnitine palmitoyltransferase 1b, muscle
A_51_P251387	-2.766525	Uevld	54122	UEV and lactate/malate dehyrogenase domains
A_52_P819044	-3.9533157
A_52_P996341	-2.7347064	Mastl	67121	microtubule associated serine/threonine kinase-like
A_51_P168172	-2.5781817	Ammecr1l	225339	AMME chromosomal region gene 1-like
A_52_P83733	-3.2125669	Tmem260	218989	transmembrane protein 260
A_52_P113640	-2.0295336	Ppip5k2	227399	diphosphoinositol pentakisphosphate kinase 2
A_51_P136411	-2.8185222	Dgki	320127	diacylglycerol kinase, iota
A_52_P210424	-2.1426237	Cacna1a	12286	calcium channel, voltage-dependent, P/Q type, alpha 1A subunit
A_51_P133737	-2.0472004	Luc7l3	67684	LUC7-like 3 (S. cerevisiae)
A_52_P592749	-2.5837421	Taf9b	407786	TAF9B RNA polymerase II, TATA box binding protein (TBP)-associated factor
A_51_P340805	-2.8154147	Zkscan4	544922	zinc finger with KRAB and SCAN domains 4
A_52_P811431	-3.8801572
A_51_P500200	-2.6635196	Inpp4a	269180	inositol polyphosphate-4-phosphatase, type I
A_52_P424550	-3.2969835	C230014O12Rik	329387	RIKEN cDNA C230014O12 gene
A_52_P308593	-2.0453374	4930432J09Rik	73877	RIKEN cDNA 4930432J09 gene
A_52_P35561	-5.7212625	Trpc1	22063	transient receptor potential cation channel, subfamily C, member 1
A_51_P314111	-2.0218053	Psip1	101739	PC4 and SFRS1 interacting protein 1
A_51_P126258	-2.2351155	Pcdhga1	93709	protocadherin gamma subfamily A, 1
A_51_P484477	-2.0151591	Ap4e1	108011	adaptor-related protein complex AP-4, epsilon 1
A_51_P380056	-2.0898533	4930432F04Rik	78792	RIKEN cDNA 4930432F04 gene
A_52_P819789	-2.063355
A_51_P448466	-2.1234841	Masp2	17175	mannan-binding lectin serine peptidase 2
A_52_P502141	-2.215759	Hectd2	226098	HECT domain containing 2
A_51_P262453	-5.029981
A_52_P1052029	-2.1565204
A_51_P161401	-3.1850255	Ankrd44	329154	ankyrin repeat domain 44
A_51_P141660	-2.2150147	Dmxl2	235380	Dmx-like 2
A_51_P310862	-2.141185	Zfp455	218311	zinc finger protein 455
A_52_P491733	-3.3463311
A_51_P441231	-2.4439676
A_52_P287781	-3.3419957	Fgf9	14180	fibroblast growth factor 9
A_52_P117920	-2.3527389	Lce1j	545547	late cornified envelope 1J
A_52_P175116	-2.2748613	Nr2c1	22025	nuclear receptor subfamily 2, group C, member 1
A_51_P352773	-2.2923143	Defa-rs7	13226	defensin, alpha, related sequence 7
A_51_P457331	-2.1420524	Hmgn5	50887	high-mobility group nucleosome binding domain 5
A_52_P446237	-3.6780918	Fancm	104806	Fanconi anemia, complementation group M
A_52_P253025	-4.178845	Neo1	18007	neogenin
A_52_P1100524	-2.6438951
A_52_P559550	-2.7631083
A_52_P316841	-2.746726	A430057L12Rik	320372	RIKEN cDNA A430057L12 gene
A_52_P40504	-3.1078153
A_52_P203398	-2.1823885	Proz	66901	protein Z, vitamin K-dependent plasma glycoprotein
A_51_P338206	-3.4139664	Pde1c	18575	phosphodiesterase 1C
A_52_P113672	-2.0986247	Chml	12663	choroideremia-like
A_52_P1132687	-2.1993127
A_51_P220422	-2.313548	Pacsin1	23969	protein kinase C and casein kinase substrate in neurons 1
A_51_P289679	-2.096953	Npm2	328440	nucleophosmin/nucleoplasmin 2
A_52_P761812	-3.232423	2810427C15Rik	69979	RIKEN cDNA 2810427C15 gene
A_51_P457775	-2.0929177	Evi5	14020	ecotropic viral integration site 5
A_52_P309797	-2.4301314
A_52_P143261	-3.9870229
A_52_P747103	-2.008831
A_52_P166868	-2.3182375	Nudt13	67725	nudix (nucleoside diphosphate linked moiety X)-type motif 13
A_51_P122821	-3.1964188
A_51_P122481	-8.012231
A_52_P672636	-2.5935097	Olfr974	259111	olfactory receptor 974
A_52_P134598	-2.0465527	Scml2	107815	sex comb on midleg-like 2 (Drosophila)
A_51_P302605	-2.6135051	Olfr31	18330	olfactory receptor 31
A_52_P571801	-5.2182417	Cml1	66116	camello-like 1
A_52_P1196831	-2.330434
A_52_P382149	-2.5861726	Cyp26a1	13082	cytochrome P450, family 26, subfamily a, polypeptide 1
A_51_P267447	-4.330491	Adam19	11492	a disintegrin and metallopeptidase domain 19 (meltrin beta)
A_52_P1027961	-2.1735814	Gm5086	328314	predicted gene 5086
A_51_P231364	-2.1026301	Sepsecs	211006	Sep (O-phosphoserine) tRNA:Sec (selenocysteine) tRNA synthase
A_51_P384967	-2.0952604
A_52_P241214	-3.0311193
A_52_P557170	-2.5377572	Olfr996	258429	olfactory receptor 996
A_52_P78423	-2.2876325	5330421C15Rik	78279	RIKEN cDNA 5330421C15 gene
A_51_P265154	-2.7936559	2900056M20Rik	72997	RIKEN cDNA 2900056M20 gene
A_52_P416280	-3.403108	Enpp6	320981	ectonucleotide pyrophosphatase/phosphodiesterase 6
A_51_P244034	-2.9870212	Rexo4	227656	REX4, RNA exonuclease 4 homolog (S. cerevisiae)
A_51_P456826	-2.629073	Slc19a3	80721	solute carrier family 19, member 3
A_51_P249889	-2.381649
A_52_P554496	-2.3159876	Olfr1138	258632	olfactory receptor 1138
A_51_P452890	-2.858688	Ssxb1	67985	synovial sarcoma, X member B, breakpoint 1
A_52_P559044	-2.4290304	Mapk8	26419	mitogen-activated protein kinase 8
A_52_P423462	-2.2856197
A_52_P1131525	-3.0381258
A_52_P923903	-2.2215948
A_52_P184395	-2.6043632	Actl6b	83766	actin-like 6B
A_51_P274409	-2.2331889	Sycp2	320558	synaptonemal complex protein 2
A_52_P341489	-3.3323908	Gm7120	633640	predicted gene 7120
A_51_P287715	-4.1045127	3100003L13Rik	73099	RIKEN cDNA 3100003L13 gene
A_51_P516006	-3.169732	Ntrk2	18212	neurotrophic tyrosine kinase, receptor, type 2
A_51_P500082	-3.597849	Gm14446	667373	predicted gene 14446
A_52_P467488	-3.3299372	Slc35d3	76157	solute carrier family 35, member D3
A_52_P1116002	-2.1956184
A_51_P369657	-2.0788393
A_52_P1124491	-2.2458587
A_51_P159492	-2.318236	Ocrl	320634	oculocerebrorenal syndrome of Lowe
A_52_P553471	-4.819934	Lipa	16889	lysosomal acid lipase A
A_52_P1163810	-2.3347847
A_52_P452199	-2.4119759
A_52_P354837	-2.3562157	B230205o20rik	77413	uncharacterized LOC77413
A_52_P671525	-3.0290532	Zmat1	215693	zinc finger, matrin type 1
A_51_P195044	-2.9480183	Dppa3	73708	developmental pluripotency-associated 3
A_52_P884929	-2.2082767
A_51_P193316	-4.1263175
A_52_P21642	-2.03378
A_51_P245939	-2.7852054	Snhg1	83673	small nucleolar RNA host gene (non-protein coding) 1
A_52_P859659	-2.4652395
A_51_P464838	-3.0600402	Il17rb	50905	interleukin 17 receptor B
A_52_P350554	-2.0064545	Kcnb1	16500	potassium voltage gated channel, Shab-related subfamily, member 1
A_52_P800301	-3.1265156
A_51_P224660	-2.8738492
A_52_P93393	-2.5545382	Gxylt2	232313	glucoside xylosyltransferase 2
A_52_P275700	-2.0411575	Nr2f1	13865	nuclear receptor subfamily 2, group F, member 1
A_52_P300940	-3.386397	Lrba	80877	LPS-responsive beige-like anchor
A_51_P379687	-2.0960772	Gm10413	100041774	predicted gene 10413
A_52_P452364	-2.0236726	Ube2v2	70620	ubiquitin-conjugating enzyme E2 variant 2
A_52_P250590	-2.0157762	Dnajc13	235567	DnaJ (Hsp40) homolog, subfamily C, member 13
A_51_P388973	-2.35723	Zhx1	22770	zinc fingers and homeoboxes 1
A_52_P349521	-2.3104742
A_51_P243063	-2.15376	Tmem216	68642	transmembrane protein 216
A_52_P577329	-2.5678885	Tmem88b	320587	transmembrane protein 88B
A_52_P416367	-2.822948	Asah2	54447	N-acylsphingosine amidohydrolase 2
A_52_P1116362	-2.0125577
A_52_P64570	-2.4446323
A_52_P68893	-2.7664897	Ifng	15978	interferon gamma
A_52_P43578	-7.167058	D130017N08Rik	320064	RIKEN cDNA D130017N08 gene
A_52_P349263	-2.5498862	Mkln1	27418	muskelin 1, intracellular mediator containing kelch motifs
A_52_P268911	-2.9840348	Ikzf2	22779	IKAROS family zinc finger 2
A_52_P76104	-2.4274523	1700016D18Rik	100310787	RIKEN cDNA 1700016D18 gene
A_51_P418375	-4.5320826	Jam2	67374	junction adhesion molecule 2
A_51_P222993	-12.007724	Pnmal1	71691	PNMA-like 1
A_51_P511546	-2.506924	Gldc	104174	glycine decarboxylase
A_51_P255832	-2.3890548	Omg	18377	oligodendrocyte myelin glycoprotein
A_51_P456721	-2.8654802	Azgp1	12007	alpha-2-glycoprotein 1, zinc
A_51_P382849	-2.1338904	Emb	13723	embigin
A_52_P387882	-3.2877483	Fbll1	237730	fibrillarin-like 1
A_51_P304296	-2.6213064	Tpcn1	252972	two pore channel 1
A_52_P875364	-2.3350306
A_51_P215559	-4.5047	BC021614	225884	cDNA sequence BC021614
A_51_P148509	-4.2050176	Ttn	22138	titin
A_52_P270175	-2.592708	Mmp28	118453	matrix metallopeptidase 28 (epilysin)
A_52_P183524	-2.9812703	Tmem86b	68255	transmembrane protein 86B
A_52_P747362	-3.2347999	D230044P21Rik	319396	RIKEN cDNA D230044P21 gene
A_52_P73836	-4.409548
A_52_P232438	-3.3358624	Olfr1419	257938	olfactory receptor 1419
A_51_P335019	-2.9827056	Ggct	110175	gamma-glutamyl cyclotransferase
A_52_P153758	-2.9516115	Trank1	320429	tetratricopeptide repeat and ankyrin repeat containing 1
A_51_P221308	-2.813568
A_52_P117221	-2.0490084	Eml6	237711	echinoderm microtubule associated protein like 6
A_52_P290152	-2.2132242	6720401G13Rik	103012	RIKEN cDNA 6720401G13 gene
A_52_P1092024	-5.7862773
A_52_P739682	-4.512753
A_52_P534118	-2.4961796	Eea1	216238	early endosome antigen 1
A_52_P495251	-2.316651	Gm10220	434689	predicted gene 10220
A_52_P907845	-2.1413503	C130079B09Rik	399637	RIKEN cDNA C130079B09 gene
A_51_P227962	-3.4214683	Dynlrb2	75465	dynein light chain roadblock-type 2
A_52_P1010776	-2.4624763	2900056M20Rik	72997	RIKEN cDNA 2900056M20 gene
A_51_P135920	-2.3031783
A_52_P464372	-2.067957	P2ry1	18441	purinergic receptor P2Y, G-protein coupled 1
A_51_P277588	-2.3021128	Sfrs18	66625	serine/arginine-rich splicing factor 18
A_52_P338530	-2.0592663	Zdhhc20	75965	zinc finger, DHHC domain containing 20
A_51_P430055	-3.9337354	Tspan7	21912	tetraspanin 7
A_52_P891664	-2.1028693
A_52_P97287	-2.5286899
A_51_P110672	-3.1097317	Mst1r	19882	macrophage stimulating 1 receptor (c-met-related tyrosine kinase)
A_51_P176225	-3.227246	2410089E03Rik	73692	RIKEN cDNA 2410089E03 gene
A_52_P142616	-2.762429
A_52_P252726	-3.2402618	Dcn	13179	decorin
A_52_P590339	-2.3943396	Kazn	71529	kazrin, periplakin interacting protein
A_52_P507890	-2.296138	Zfp113	56314	zinc finger protein 113
A_52_P731549	-2.6205747	Tbck	271981	TBC1 domain containing kinase
A_51_P205524	-2.6688795	Otor	57329	otoraplin
A_51_P266138	-2.0920928	2010111I01Rik	72061	RIKEN cDNA 2010111I01 gene
A_52_P566548	-4.1652174	A130009I22Rik	319949	RIKEN cDNA A130009I22 gene
A_52_P1172633	-2.0827866
A_52_P105493	-2.3429003	Zfyve27	319740	zinc finger, FYVE domain containing 27
A_52_P631189	-2.561997	E230008J23Rik	319683	RIKEN cDNA E230008J23 gene
A_52_P1108033	-2.615208
A_51_P179878	-4.0439596	Slc1a2	20511	solute carrier family 1 (glial high affinity glutamate transporter), member 2
A_52_P444839	-2.0518138	Myb	17863	myeloblastosis oncogene
A_52_P555144	-2.9196322
A_52_P1068705	-6.407436	4932439E07Rik	103405	RIKEN cDNA 4932439E07 gene
A_51_P214612	-2.4951477
A_52_P1120014	-2.549915
A_52_P357241	-3.2616339	Krr1	52705	KRR1, small subunit (SSU) processome component, homolog (yeast)
A_52_P507665	-2.3296208	Rps6ka6	67071	ribosomal protein S6 kinase polypeptide 6
A_51_P464394	-3.7424393	Klb	83379	klotho beta
A_52_P564166	-2.406598	Myom1	17929	myomesin 1
A_52_P646957	-2.3749144	Grpr	14829	gastrin releasing peptide receptor
A_52_P179250	-2.0034752	Kat6b	54169	K(lysine) acetyltransferase 6B
A_51_P187491	-2.593529	Epgn	71920	epithelial mitogen
A_51_P393544	-2.6949527
A_52_P1139596	-2.9076393
A_52_P326513	-3.2448328	Kcna4	16492	potassium voltage-gated channel, shaker-related subfamily, member 4
A_52_P480351	-2.3016157	Loxl2	94352	lysyl oxidase-like 2
A_52_P422481	-2.102894
A_52_P378167	-2.9675055	Pcdha9	192161	protocadherin alpha 9
A_52_P852190	-5.2227173
A_51_P239970	-2.1907644	Phka2	110094	phosphorylase kinase alpha 2
A_51_P285790	-2.5022357	Dnd1	213236	dead end homolog 1 (zebrafish)
A_52_P631247	-2.071185	Asxl2	75302	additional sex combs like 2 (Drosophila)
A_52_P393181	-2.2229602	Spock2	94214	sparc/osteonectin, cwcv and kazal-like domains proteoglycan 2
A_52_P229972	-3.876941	Slc22a1	20517	solute carrier family 22 (organic cation transporter), member 1
A_51_P347945	-5.330154	Olfr1451	258700	olfactory receptor 1451
A_51_P136742	-2.145268	Il1rap	16180	interleukin 1 receptor accessory protein
A_51_P258690	-2.455223	Scrg1	20284	scrapie responsive gene 1
A_51_P381440	-2.4035504	Zfp40	22700	zinc finger protein 40
A_52_P172691	-5.141963	4732465E10Rik	320418	RIKEN cDNA 4732465E10 gene
A_51_P186741	-2.0656538	Sh3bgrl	56726	SH3-binding domain glutamic acid-rich protein like
A_52_P313020	-3.0444224	4932438A13Rik	229227	RIKEN cDNA 4932438A13 gene
A_51_P130546	-2.8573153
A_52_P336133	-2.724885	Zfp62	22720	zinc finger protein 62
A_52_P376502	-2.0102105	Camk1d	227541	calcium/calmodulin-dependent protein kinase ID
A_52_P213344	-2.6191776
A_52_P559140	-4.827315	Igkv2-112	381776	immunoglobulin kappa variable 2-112
A_52_P323914	-2.0828018	Grk4	14772	G protein-coupled receptor kinase 4
A_51_P463270	-2.4475331	Snapc3	77634	small nuclear RNA activating complex, polypeptide 3
A_51_P355802	-2.653101	Rassf2	215653	Ras association (RalGDS/AF-6) domain family member 2
A_52_P119947	-2.396974	Fam20a	208659	family with sequence similarity 20, member A
A_51_P513515	-2.412763	Fer1l4	74562	fer-1-like 4 (C. elegans)
A_52_P425499	-2.0091488
A_52_P326657	-3.0705378	Fam167b	230766	family with sequence similarity 167, member B
A_52_P23000	-2.037909
A_52_P499543	-2.5525558	Dlg1	13383	discs, large homolog 1 (Drosophila)
A_52_P58359	-2.2799695	Tlx1	21908	T cell leukemia, homeobox 1
A_52_P661503	-2.1667602	Deptor	97998	DEP domain containing MTOR-interacting protein
A_52_P201482	-3.8646076	Prickle2	243548	prickle homolog 2 (Drosophila)
A_52_P243611	-2.526995	Dscaml1	114873	Down syndrome cell adhesion molecule like 1
A_52_P193994	-2.3243904	Rps6kb1	72508	ribosomal protein S6 kinase, polypeptide 1
A_51_P335569	-2.4502661	Slco1a4	28250	solute carrier organic anion transporter family, member 1a4
A_51_P519524	-3.5939384	Gpr152	269053	G protein-coupled receptor 152
A_52_P859153	-3.1841493	Tcf12	21406	transcription factor 12
A_52_P308413	-2.387248	1810011H11Rik	69069	RIKEN cDNA 1810011H11 gene
A_51_P118945	-2.2483485	Il2ra	16184	interleukin 2 receptor, alpha chain
A_52_P987411	-2.5182471
A_52_P715616	-4.0326967	D230034L24Rik	106251	RIKEN cDNA D230034L24 gene
A_52_P384100	-2.0149548	Bdnf	12064	brain derived neurotrophic factor
A_52_P162055	-3.259455	Vps13d	230895	vacuolar protein sorting 13 D (yeast)
A_52_P25283	-2.7288508	Sphkap	77629	SPHK1 interactor, AKAP domain containing
A_52_P1196662	-4.362158
A_52_P521178	-2.908738	Ppm1d	53892	protein phosphatase 1D magnesium-dependent, delta isoform
A_52_P228810	-3.527937
A_52_P763117	-2.690866
A_51_P130079	-3.7057428	Lrmp	16970	lymphoid-restricted membrane protein
A_52_P915781	-2.6302745
A_52_P80414	-4.4974694	9130023H24Rik	100043133	RIKEN cDNA 9130023H24 gene
A_52_P307887	-2.3622708	Gm9946	330403	predicted gene 9946
A_52_P407191	-11.018241	Cct8l1	242891	chaperonin containing TCP1, subunit 8 (theta)-like 1
A_52_P915344	-2.2193599
A_52_P570831	-4.695243	Dock6	319899	dedicator of cytokinesis 6
A_52_P779005	-3.4803276	Gbas	14467	glioblastoma amplified sequence
A_52_P923256	-2.1410618
A_52_P194657	-2.6219635
A_52_P988461	-3.7163296
A_52_P1164051	-2.0336645
A_52_P389235	-3.5207648	Fam115a	77574	family with sequence similarity 115, member A
A_52_P226185	-2.590657
A_52_P1068696	-5.445534
A_52_P137878	-2.1020148	5830418K08Rik	319675	RIKEN cDNA 5830418K08 gene
A_51_P288009	-3.7956693	Chrng	11449	cholinergic receptor, nicotinic, gamma polypeptide
A_52_P1069484	-2.4651237
A_52_P308843	-2.2920952	Skida1	72668	SKI/DACH domain containing 1
A_51_P388517	-2.2066631	Ldb2	16826	LIM domain binding 2
A_52_P551771	-2.6634336	Olfr849	258520	olfactory receptor 849
A_52_P623413	-2.1011763	LOC101055647	101055647	uncharacterized LOC101055647
A_51_P261713	-2.608122	Slco1c1	58807	solute carrier organic anion transporter family, member 1c1
A_52_P663446	-3.3877861	Slc7a11	26570	solute carrier family 7 (cationic amino acid transporter, y+ system), member 11
A_51_P128356	-2.9188762	5730433N10Rik	70545	RIKEN cDNA 5730433N10 gene
A_51_P185458	-2.8065028	Vps13b	666173	vacuolar protein sorting 13B (yeast)
A_52_P804819	-2.3903418
A_51_P199032	-2.1257136	A330027G23Rik	100381256	RIKEN cDNA A330027G23 gene
A_52_P453546	-3.5905068	Afg3l1	114896	AFG3(ATPase family gene 3)-like 1 (yeast)
A_52_P397046	-2.4136205	Nhsl1	215819	NHS-like 1
A_52_P86483	-2.4748268	Cspp1	211660	centrosome and spindle pole associated protein 1
A_52_P192625	-2.6684198	Sox10	20665	SRY-box containing gene 10
A_51_P494605	-3.9053617
A_51_P149112	-3.8667383
A_51_P462870	-2.063233	Mkl2	239719	MKL/myocardin-like 2
A_52_P16642	-2.839968
A_52_P106379	-2.8018208
A_52_P867124	-2.546523
A_52_P1140260	-2.0316148	Stil	20460	Scl/Tal1 interrupting locus
A_52_P1109289	-2.8396928
A_51_P498042	-2.0358584	Mbd3l2	234988	methyl-CpG binding domain protein 3-like 2
A_52_P18081	-2.30547	Tmem206	66950	transmembrane protein 206
A_51_P487424	-3.6682992
A_51_P153294	-2.51677
A_52_P176405	-2.41671	Arx	11878	aristaless related homeobox
A_52_P46056	-2.2624173	9330111N05Rik	319983	RIKEN cDNA 9330111N05 gene
A_52_P1004637	-2.3090222
A_52_P1116481	-2.4966881	Eya3	14050	eyes absent 3 homolog (Drosophila)
A_52_P290457	-2.097736	Adam12	11489	a disintegrin and metallopeptidase domain 12 (meltrin alpha)
A_52_P714766	-6.446315
A_52_P628521	-2.5712373	B130052P14Rik	105442	RIKEN cDNA B130052P14 gene
A_51_P224868	-2.501598	4930456L15Rik	71650	RIKEN cDNA 4930456L15 gene
A_52_P29392	-5.3105435	Zfp385a	29813	zinc finger protein 385A
A_52_P811068	-2.125037
A_51_P282720	-2.1079962	AW551984	244810	expressed sequence AW551984
A_51_P309988	-2.6121068	Gprc5c	70355	G protein-coupled receptor, family C, group 5, member C
A_52_P161795	-2.0570903	Zfr	22763	zinc finger RNA binding protein
A_51_P393112	-2.2035024
A_52_P32733	-2.116659	Nfkb1	18033	nuclear factor of kappa light polypeptide gene enhancer in B cells 1, p105
A_52_P1020397	-3.616928
A_51_P312035	-2.2502081	Cd300e	217306	CD300e antigen
A_52_P545491	-2.2375317	Kcmf1	74287	potassium channel modulatory factor 1
A_51_P343717	-2.1176906
A_52_P277104	-3.2595537	Bank1	242248	B cell scaffold protein with ankyrin repeats 1
A_52_P835246	-2.6999035
A_51_P412225	-2.094253	Tbc1d16	207592	TBC1 domain family, member 16
A_52_P1147388	-2.339083	6820402I19Rik	74509	RIKEN cDNA 6820402I19 gene
A_52_P793862	-3.308526	4930447N08Rik	71647	RIKEN cDNA 4930447N08 gene
A_52_P796271	-2.3484557
A_51_P114148	-2.2200334	Foxn1	15218	forkhead box N1
A_52_P1189070	-2.384413
A_51_P468269	-3.0780363	Itpr2	16439	inositol 1,4,5-triphosphate receptor 2
A_51_P208603	-2.723967	Dio2	13371	deiodinase, iodothyronine, type II
A_52_P93837	-2.3318646	Mme	17380	membrane metallo endopeptidase
A_51_P110873	-2.0383632	Olfr1404	258881	olfactory receptor 1404
A_51_P192694	-2.0077178
A_52_P39372	-2.0698218	Ralgapa1	56784	Ral GTPase activating protein, alpha subunit 1
A_51_P383093	-2.1274948
A_51_P230287	-2.4838905	Sorcs2	81840	sortilin-related VPS10 domain containing receptor 2
A_52_P329207	-2.045961	Wfdc18	14038	WAP four-disulfide core domain 18
A_52_P405772	-2.0049222	Plat	18791	plasminogen activator, tissue
A_52_P225592	-2.184577	Fem1a	14154	feminization 1 homolog a (C. elegans)
A_51_P407675	-2.4140382	Zrsr1	22183	zinc finger (CCCH type), RNA binding motif and serine/arginine rich 1
A_52_P534543	-2.441827	Iqce	74239	IQ motif containing E
A_51_P186265	-2.3156476	Atg4c	242557	autophagy related 4C, cysteine peptidase
A_51_P219312	-2.3229907	Ttn	22138	titin
A_51_P408123	-2.0000508	Herc1	235439	hect (homologous to the E6-AP (UBE3A) carboxyl terminus) domain and RCC1 (CHC1)-like domain (RLD) 1
A_52_P550802	-2.0370286
A_52_P507736	-3.2502759	Itgb8	320910	integrin beta 8
A_51_P353663	-2.6144974	Cdc26	66440	cell division cycle 26
A_52_P1148677	-2.4567506	Gm10322	100039225	predicted gene 10322
A_52_P139438	-3.3131607	Fam150b	100294583	family with sequence similarity 150, member B
A_52_P2160	-2.338822	A530013C23Rik	329562	RIKEN cDNA A530013C23 gene
A_51_P382912	-2.018946	Slc2a10	170441	solute carrier family 2 (facilitated glucose transporter), member 10
A_51_P262972	-2.0176308	Prrx1	18933	paired related homeobox 1
A_51_P342837	-2.2402377	Trim67	330863	tripartite motif-containing 67
A_51_P360004	-2.594555	Ocstamp	74614	osteoclast stimulatory transmembrane protein
A_52_P99705	-3.0203943	Ctnna3	216033	catenin (cadherin associated protein), alpha 3
A_51_P262925	-2.336749	1700018F24Rik	69396	RIKEN cDNA 1700018F24 gene
A_52_P71353	-3.577703	Psd3	234353	pleckstrin and Sec7 domain containing 3
A_51_P320261	-2.0591247	4933406B15Rik	71064	RIKEN cDNA 4933406B15 gene
A_52_P307180	-2.1929586
A_52_P357829	-2.728623	Gli2	14633	GLI-Kruppel family member GLI2
A_51_P100852	-2.4319384	Fam26f	215900	family with sequence similarity 26, member F
A_52_P370731	-2.109465	Meaf6	70088	MYST/Esa1-associated factor 6
A_52_P422088	-2.076367	Ptbp2	56195	polypyrimidine tract binding protein 2
A_52_P569375	-2.2194495	Fgf5	14176	fibroblast growth factor 5
A_52_P852077	-2.8434286
A_51_P216268	-2.5743914	2610001A08Rik	70108	RIKEN cDNA 2610001A08 gene
A_52_P522166	-2.2170153	Snhg5	72655	small nucleolar RNA host gene 5
A_51_P243646	-2.6252563	Gm4922	237300	predicted gene 4922
A_52_P1067846	-4.176536
A_51_P261107	-2.6578782	Ogt	108155	O-linked N-acetylglucosamine (GlcNAc) transferase (UDP-N-acetylglucosamine:polypeptide-N-acetylglucosaminyl transferase)
A_51_P240448	-6.4536953	Pi15	94227	peptidase inhibitor 15
A_52_P484956	-2.7924323	Nnat	18111	neuronatin
A_51_P277006	-2.5164664	Chst8	68947	carbohydrate (N-acetylgalactosamine 4-0) sulfotransferase 8
A_52_P355124	-2.3018506	Ppp1r17	19051	protein phosphatase 1, regulatory subunit 17
A_52_P164236	-2.6133204	Fgd4	224014	FYVE, RhoGEF and PH domain containing 4
A_52_P615074	-7.0876455	C030034L19Rik	320088	RIKEN cDNA C030034L19 gene
A_52_P58537	-4.028306	Dmxl1	240283	Dmx-like 1
A_51_P443412	-3.528227	Scube1	64706	signal peptide, CUB domain, EGF-like 1
A_51_P121101	-4.537857
A_52_P54169	-3.8588912	Zbtb20	56490	zinc finger and BTB domain containing 20
A_52_P891260	-4.95123
A_51_P189115	-2.7997293
A_52_P136138	-3.902307	Fdft1	14137	farnesyl diphosphate farnesyl transferase 1
A_51_P264084	-2.8327813	Rab36	76877	RAB36, member RAS oncogene family
A_51_P442118	-2.3855538	Gm6583	625424	predicted gene 6583
A_52_P1156757	-2.6463382
A_51_P271697	-3.3633616	BC021891	234878	cDNA sequence BC021891
A_51_P293278	-2.9542377	Tcte2	21646	t-complex-associated testis expressed 2
A_52_P229572	-2.5899718	Lrch2	210297	leucine-rich repeats and calponin homology (CH) domain containing 2
A_51_P352118	-2.2675626
A_51_P116725	-2.2682495	Olfr1240	258804	olfactory receptor 1240
A_52_P107674	-4.8435197	Rbm4b	66704	RNA binding motif protein 4B
A_51_P428905	-2.3327498	4933411G06Rik	71090	Sumo1 pseudogene
A_52_P207294	-2.9189901	Lca5	75782	Leber congenital amaurosis 5 (human)
A_52_P673978	-4.7375875	Glce	93683	glucuronyl C5-epimerase
A_51_P104939	-2.2370613	Klra5	16636	killer cell lectin-like receptor, subfamily A, member 5
A_52_P269057	-2.6577451	Elp4	77766	elongation protein 4 homolog (S. cerevisiae)
A_52_P723233	-3.2318947
A_51_P381373	-3.5483902	Wwp1	107568	WW domain containing E3 ubiquitin protein ligase 1
A_52_P1156254	-4.605885
A_51_P173678	-2.5006344	Slc10a6	75750	solute carrier family 10 (sodium/bile acid cotransporter family), member 6
A_52_P327582	-2.3293166
A_51_P436596	-2.1044576	Rph3a	19894	rabphilin 3A
A_51_P424854	-5.117891	Ahsg	11625	alpha-2-HS-glycoprotein
A_51_P401343	-2.702626	Cldn14	56173	claudin 14
A_52_P827911	-3.8225427
A_51_P140964	-3.247391	Olfr1359	258067	olfactory receptor 1359
A_52_P351669	-2.0368767	Gcc2	70297	GRIP and coiled-coil domain containing 2
A_52_P441417	-2.282592
A_51_P384831	-2.2969556	Syt12	171180	synaptotagmin XII
A_51_P235107	-3.6755586	Vmn1r79	100042437	vomeronasal 1 receptor 79
A_52_P100222	-2.1279144	Psmc2	19181	proteasome (prosome, macropain) 26S subunit, ATPase 2
A_52_P1139679	-2.5559218
A_52_P169181	-2.4859078	Auts2	319974	autism susceptibility candidate 2
A_52_P650540	-2.085203	Nlrp3	216799	NLR family, pyrin domain containing 3
A_51_P189269	-2.1530466	Mbnl2	105559	muscleblind-like 2
A_51_P469817	-4.0186515	Postn	50706	periostin, osteoblast specific factor
A_51_P425833	-2.0754743	Lztfl1	93730	leucine zipper transcription factor-like 1
A_52_P1179988	-2.898521
A_51_P497741	-2.7723415	Wdr95	381693	WD40 repeat domain 95
A_52_P835711	-2.5423117
A_52_P174421	-2.173887	Galc	14420	galactosylceramidase
A_51_P479321	-2.5799391	Acss1	68738	acyl-CoA synthetase short-chain family member 1
A_51_P387108	-2.0411518	4930535E02Rik	75218	RIKEN cDNA 4930535E02 gene
A_52_P443676	-2.5335124	9330119M13Rik	319963	RIKEN cDNA 9330119M13 gene
A_52_P1052304	-2.4117699	1810062O18Rik	75602	RIKEN cDNA 1810062O18 gene
A_52_P507808	-3.8372703	Chm	12662	choroidermia
A_52_P196232	-3.1131725	Txndc16	70561	thioredoxin domain containing 16
A_51_P381006	-2.3505716	Olfr557	258358	olfactory receptor 557
A_52_P623053	-2.6009834	Add2	11519	adducin 2 (beta)
A_52_P1131567	-2.2318892
A_52_P714230	-2.1335487
A_52_P376360	-2.03004	Pdgfc	54635	platelet-derived growth factor, C polypeptide
A_52_P289173	-4.4573946
A_52_P97564	-3.1923265	Acss2	60525	acyl-CoA synthetase short-chain family member 2
A_52_P14842	-2.9142237	Dcaf17	75763	DDB1 and CUL4 associated factor 17
A_52_P1163703	-2.3356104
A_52_P223646	-3.2655654	Cabyr	71132	calcium-binding tyrosine-(Y)-phosphorylation regulated (fibrousheathin 2)
A_51_P310491	-2.1844442
A_51_P387039	-2.6484392
A_52_P416752	-2.0767221
A_52_P111728	-2.3472753
A_51_P160536	-4.064865	1700026D08Rik	75556	RIKEN cDNA 1700026D08 gene
A_52_P223495	-2.014241	Itga4	16401	integrin alpha 4
A_52_P3811	-2.7204704	Tgfbr2	21813	transforming growth factor, beta receptor II
A_52_P368214	-2.0573955	Spire1	68166	spire homolog 1 (Drosophila)
A_52_P1075773	-2.5934777	9930024M15Rik	399602	RIKEN cDNA 9930024M15 gene
A_51_P491777	-2.6223874	Olfr59	18359	olfactory receptor 59
A_51_P211519	-3.3860552	9930013L23Rik	80982	RIKEN cDNA 9930013L23 gene
A_51_P283818	-4.274418	Prss23	76453	protease, serine, 23
A_51_P176387	-2.3412085	Hook3	320191	hook homolog 3 (Drosophila)
A_52_P323309	-2.1765296
A_51_P399896	-2.1659985	Matk	17179	megakaryocyte-associated tyrosine kinase
A_52_P236426	-3.1513326	Cers4	67260	ceramide synthase 4
A_52_P490470	-2.3119404
A_51_P514379	-3.076833	Zik1	22775	zinc finger protein interacting with K protein 1
A_52_P396917	-3.2146707	Eml5	319670	echinoderm microtubule associated protein like 5
A_52_P600492	-2.0706027	Kalrn	545156	kalirin, RhoGEF kinase
A_52_P362466	-5.8784094
A_52_P883537	-2.1705568
A_51_P354548	-2.768073	2810428J06Rik	67058	RIKEN cDNA 2810428J06 gene
A_51_P502043	-2.187997
A_51_P436342	-3.8037395	Hoxb5	15413	homeobox B5
A_52_P397883	-5.6576977	Slc35a3	229782	solute carrier family 35 (UDP-N-acetylglucosamine (UDP-GlcNAc) transporter), member 3
A_52_P956153	-2.3495865
A_52_P924766	-2.5053601
A_52_P266365	-3.3790386	Memo1	76890	mediator of cell motility 1
A_52_P1138643	-2.1445806	1110020A10Rik	68648	RIKEN cDNA 1110020A10 gene
A_52_P97221	-2.2094352	Bicd1	12121	bicaudal D homolog 1 (Drosophila)
A_52_P298088	-2.5088124	Itgb1bp2	26549	integrin beta 1 binding protein 2
A_51_P449244	-2.1154184	Olfr1457	258568	olfactory receptor 1457
A_52_P57036	-2.4430242	Dync2h1	110350	dynein cytoplasmic 2 heavy chain 1
A_52_P803823	-2.7082005
A_52_P620355	-5.7039638	Nrl	18185	neural retina leucine zipper gene
A_51_P283968	-3.807543	Adamts18	208936	a disintegrin-like and metallopeptidase (reprolysin type) with thrombospondin type 1 motif, 18
A_52_P133839	-2.1787357
A_52_P655278	-2.4124174	Mas1	17171	MAS1 oncogene
A_52_P11494	-2.0935452
A_51_P295757	-2.260868	Mark1	226778	MAP/microtubule affinity-regulating kinase 1
A_52_P623080	-3.2908187	E130009g09rik	320062	uncharacterized LOC320062
A_52_P545346	-4.5256124	Itfg1	71927	integrin alpha FG-GAP repeat containing 1
A_51_P387528	-2.1737378	Ak7	78801	adenylate kinase 7
A_51_P293401	-5.1914644
A_52_P985950	-3.398107	Gm8140	666504	predicted gene 8140
A_51_P193821	-2.3946235	Arr3	170735	arrestin 3, retinal
A_52_P529098	-2.2907712	Yae1d1	67008	Yae1 domain containing 1
A_51_P272493	-2.6199524	Zer1	227693	zyg-11 related, cell cycle regulator
A_52_P518764	-3.0453799	Lrrcc1	71710	leucine rich repeat and coiled-coil domain containing 1
A_51_P183025	-4.0828743	Oas1d	100535	2'-5' oligoadenylate synthetase 1D
A_52_P9536	-3.0723736
A_51_P173343	-2.4177685	Dtd2	328092	D-tyrosyl-tRNA deacylase 2
A_52_P1180315	-2.7523043
A_51_P407515	-4.15903	6330407A03Rik	70720	RIKEN cDNA 6330407A03 gene
A_52_P293222	-2.0673661	Ppargc1b	170826	peroxisome proliferative activated receptor, gamma, coactivator 1 beta
A_52_P182979	-2.9098072	Tcf12	21406	transcription factor 12
A_52_P322555	-2.9942908	Pex13	72129	peroxisomal biogenesis factor 13
A_51_P362176	-3.1512275	Fgg	99571	fibrinogen gamma chain
A_51_P476687	-2.1460354	Klrb1c	17059	killer cell lectin-like receptor subfamily B member 1C
A_52_P442414	-2.7998352	Dclk3	245038	doublecortin-like kinase 3
A_52_P151362	-2.1052277	Mboat2	67216	membrane bound O-acyltransferase domain containing 2
A_52_P355480	-2.2649715
A_52_P409076	-2.3313801	Sema5a	20356	sema domain, seven thrombospondin repeats (type 1 and type 1-like), transmembrane domain (TM) and short cytoplasmic domain, (semaphorin) 5A
A_51_P413910	-3.086476	Hmx3	15373	H6 homeobox 3
A_52_P521324	-2.1920161	A930024E05Rik	109202	RIKEN cDNA A930024E05 gene
A_52_P210002	-2.4176087	Trav3-4	211027	T cell receptor alpha variable 3-4
A_52_P15166	-3.8173044
A_51_P356003	-2.1779327	Fnd3c2	331491	fibronectin type III domain containing 3C2
A_51_P297369	-3.024626	Olfr530	258512	olfactory receptor 530
A_52_P419089	-4.4525347	Fut9	14348	fucosyltransferase 9
A_52_P562624	-2.315979	Pkhd1l1	192190	polycystic kidney and hepatic disease 1-like 1
A_52_P223224	-2.1725266	Hsd17b11	114664	hydroxysteroid (17-beta) dehydrogenase 11
A_51_P482968	-4.6947727	C030005H24Rik	78537	RIKEN cDNA C030005H24 gene
A_51_P231618	-2.4247754
A_52_P456714	-2.135823	Dnah1	110084	dynein, axonemal, heavy chain 1
A_52_P23604	-6.592936	Flrt1	396184	fibronectin leucine rich transmembrane protein 1
A_51_P301586	-2.7547703	Zfp952	240067	zinc finger protein 952
A_52_P337740	-3.1976404
A_52_P322866	-2.1852727	Mob3b	214944	MOB kinase activator 3B
A_52_P794346	-2.1594524
A_52_P835833	-2.0541353
A_51_P304417	-2.1210656	BC030307	103220	cDNA sequence BC030307
A_52_P431615	-2.4655213	Gm1966	434223	predicted gene 1966
A_52_P252953	-3.1544893	Pcdhb19	93890	protocadherin beta 19
A_52_P182749	-2.3386118	D14Abb1e	218850	DNA segment, Chr 14, Abbott 1 expressed
A_51_P140803	-2.3290436	Slco1b2	28253	solute carrier organic anion transporter family, member 1b2
A_52_P386627	-2.1736345	Irak3	73914	interleukin-1 receptor-associated kinase 3
A_52_P54274	-2.045658	Masp1	17174	mannan-binding lectin serine peptidase 1
A_52_P643398	-2.2351491	Ift80	68259	intraflagellar transport 80
A_52_P472926	-2.5380905	BC021785	215928	cDNA sequence BC021785
A_52_P454361	-4.1617694	Hars	15115	histidyl-tRNA synthetase
A_51_P322933	-5.72518
A_52_P168953	-5.0565534	Vcan	13003	versican
A_51_P186622	-4.995506	E130106K03Rik	319814	RIKEN cDNA E130106K03 gene
A_52_P456702	-2.4006882	Gm3500	100041678	predicted gene 3500
A_52_P234729	-2.135592	Pkd2	18764	polycystic kidney disease 2
A_52_P449012	-2.0344424	Dnajb14	70604	DnaJ (Hsp40) homolog, subfamily B, member 14
A_52_P69020	-2.7724764	Slc24a5	317750	solute carrier family 24, member 5
A_52_P258501	-2.7506192	Vps54	245944	vacuolar protein sorting 54 (yeast)
A_51_P498640	-2.0161304	Pdxk	216134	pyridoxal (pyridoxine, vitamin B6) kinase
A_52_P544052	-2.0726123	Baz2b	407823	bromodomain adjacent to zinc finger domain, 2B
A_51_P254157	-2.4386725	LOC101055747	101055747	uncharacterized LOC101055747
A_52_P1138659	-2.129713	Fmo2	55990	flavin containing monooxygenase 2
A_51_P497044	-4.4162674	Prl8a2	13529	prolactin family 8, subfamily a, member 2
A_51_P426904	-2.1150956	Klra23	79410	killer cell lectin-like receptor subfamily A, member 23
A_52_P359010	-2.0352514	Nav2	78286	neuron navigator 2
A_52_P515495	-2.9462154	Sema4d	20354	sema domain, immunoglobulin domain (Ig), transmembrane domain (TM) and short cytoplasmic domain, (semaphorin) 4D
A_51_P160858	-2.1097379	Gnat1	14685	guanine nucleotide binding protein, alpha transducing 1
A_52_P618427	-2.9318733	Pdgfb	18591	platelet derived growth factor, B polypeptide
A_51_P518393	-2.3706112
A_52_P996776	-2.1977837
A_51_P237289	-2.0154927	4930533N22Rik	75205	RIKEN cDNA 4930533N22 gene
A_52_P95471	-2.7618115
A_51_P329503	-7.892358	Myo1d	338367	myosin ID
A_52_P443547	-2.087873	Gdpgp1	269952	GDP-D-glucose phosphorylase 1
A_51_P202424	-2.2645965
A_51_P341203	-2.8235574	Cyp3a41a	53973	cytochrome P450, family 3, subfamily a, polypeptide 41A
A_51_P475654	-2.2123315
A_52_P293385	-2.0738182	Nipbl	71175	Nipped-B homolog (Drosophila)
A_52_P162697	-2.0795531	Pvr	52118	poliovirus receptor
A_52_P1162797	-3.0101883	Nipa1	233280	non imprinted in Prader-Willi/Angelman syndrome 1 homolog (human)
A_51_P503993	-2.1309988	Bzrap1	207777	benzodiazepine receptor associated protein 1
A_52_P827810	-2.3294778
A_52_P899984	-4.436887
A_52_P190744	-3.963597	Rnpc3	67225	RNA-binding region (RNP1, RRM) containing 3
A_52_P562911	-2.1063912
A_52_P599388	-2.1247976	Cpeb2	231207	cytoplasmic polyadenylation element binding protein 2
A_52_P1051839	-2.7345963
A_51_P311706	-2.294881
[truncated: 594 more rows]

## Sheet: Supplementary Table S4
Column ID	p-value(Positive vs. Negative)	MeanRatio	FoldChange	Symbol	Entrez_Gene_ID	Definition
ILMN_1775708	0.00890522	2.00161	2.00161	SLC2A3	6515	Homo sapiens solute carrier family 2 (facilitated glucose transporter), member 3 (SLC2A3), mRNA.
ILMN_2268156	0.00800382	2.02842	2.02842	LFNG	3955	Homo sapiens LFNG O-fucosylpeptide 3-beta-N-acetylglucosaminyltransferase (LFNG), transcript variant 2, mRNA.
ILMN_1687609	0.00407026	2.04586	2.04586	AATK	9625	Homo sapiens apoptosis-associated tyrosine kinase (AATK), mRNA.
ILMN_1778240	0.00685314	2.05355	2.05355	GFOD1	54438	Homo sapiens glucose-fructose oxidoreductase domain containing 1 (GFOD1), mRNA.
ILMN_1689770	0.00700531	2.0758	2.0758	ARHGEF10L	55160	Homo sapiens Rho guanine nucleotide exchange factor (GEF) 10-like (ARHGEF10L), transcript variant 1, mRNA.
ILMN_1698585	0.00162145	-2.09234	2.09234	SLC6A20	54716	Homo sapiens solute carrier family 6 (proline IMINO transporter), member 20 (SLC6A20), transcript variant 1, mRNA.
ILMN_1754220	0.00850084	2.13612	2.13612	SF3A2	8175	Homo sapiens splicing factor 3a, subunit 2, 66kDa (SF3A2), mRNA.
ILMN_2297555	0.00308233	-2.15131	2.15131	MAGEB1	4112	Homo sapiens melanoma antigen family B, 1 (MAGEB1), transcript variant 1, mRNA.
ILMN_1746243	0.00507636	2.21816	2.21816	TES	26136	Homo sapiens testis derived transcript (3 LIM domains) (TES), transcript variant 1, mRNA.
ILMN_1653386	0.00259382	2.2206	2.2206	SULT6B1	391365	Homo sapiens sulfotransferase family, cytosolic, 6B, member 1 (SULT6B1), mRNA.
ILMN_1657248	0.00929183	2.27116	2.27116	EREG	2069	Homo sapiens epiregulin (EREG), mRNA.
ILMN_1685958	0.0059031	-2.28141	2.28141	CDH26	60437	Homo sapiens cadherin-like 26 (CDH26), transcript variant a, mRNA.
ILMN_1785605	0.00495323	-2.29887	2.29887	SDF4	51150	Homo sapiens stromal cell derived factor 4 (SDF4), mRNA.
ILMN_1734991	0.0044597	2.30519	2.30519	PPM1B	5495	Homo sapiens protein phosphatase 1B (formerly 2C), magnesium-dependent, beta isoform (PPM1B), transcript variant 4, mRNA.
ILMN_2354930	0.00997144	2.36302	2.36302	ANKRD7	56311	Homo sapiens ankyrin repeat domain 7 (ANKRD7), transcript variant 1, mRNA.
ILMN_2105298	0.00616677	2.36456	2.36456	C12orf50	160419	Homo sapiens chromosome 12 open reading frame 50 (C12orf50), mRNA.
ILMN_1693896	0.00399769	2.36796	2.36796	ATP8A2	51761	Homo sapiens ATPase, aminophospholipid transporter-like, class I, type 8A, member 2 (ATP8A2), mRNA.
ILMN_2333670	0.00793903	2.38095	2.38095	RNASE1	6035	Homo sapiens ribonuclease, RNase A family, 1 (pancreatic) (RNASE1), transcript variant 1, mRNA.
ILMN_2126461	0.00616791	-2.38152	2.38152	OR4K2	390431	Homo sapiens olfactory receptor, family 4, subfamily K, member 2 (OR4K2), mRNA.
ILMN_1775408	0.00665672	2.38393	2.38393	SPACA3	124912	Homo sapiens sperm acrosome associated 3 (SPACA3), mRNA.
ILMN_2106874	0.00857113	2.38488	2.38488	CACNG8	59283	Homo sapiens calcium channel, voltage-dependent, gamma subunit 8 (CACNG8), mRNA.
ILMN_1665884	0.00142178	2.41803	2.41803	REP15	387849	Homo sapiens RAB15 effector protein (REP15), mRNA.
ILMN_1754757	0.00560059	2.42907	2.42907	SCNN1D	6339	Homo sapiens sodium channel, nonvoltage-gated 1, delta (SCNN1D), transcript variant 2, mRNA.
ILMN_1701120	0.00249089	-2.44049	2.44049	BCL2	596	Homo sapiens B-cell CLL/lymphoma 2 (BCL2), nuclear gene encoding mitochondrial protein, transcript variant beta, mRNA.
ILMN_1655269	0.00347251	-2.49231	2.49231	C2orf66	401027	Homo sapiens chromosome 2 open reading frame 66 (C2orf66), mRNA.
ILMN_1655733	0.00869312	-2.52438	2.52438	RFC2	5982	Homo sapiens replication factor C (activator 1) 2, 40kDa (RFC2), transcript variant 1, mRNA.
ILMN_2137312	0.00639671	2.5376	2.5376	KCNJ5	3762	Homo sapiens potassium inwardly-rectifying channel, subfamily J, member 5 (KCNJ5), mRNA.
ILMN_2384405	0.00410097	2.604	2.604	RTBDN	83546	Homo sapiens retbindin (RTBDN), transcript variant 2, mRNA.
ILMN_2405264	0.00211454	-2.70443	2.70443	THSD3	145501	Homo sapiens thrombospondin, type I, domain containing 3 (THSD3), transcript variant 1, mRNA.
ILMN_2144791	0.002026	2.70779	2.70779	GOLGA6B	55889	Homo sapiens golgi autoantigen, golgin subfamily a, 6B (GOLGA6B), mRNA.
ILMN_1795183	0.00192066	2.78343	2.78343	RNASE1	6035	Homo sapiens ribonuclease, RNase A family, 1 (pancreatic) (RNASE1), transcript variant 3, mRNA.
ILMN_2233604	0.00244461	2.78723	2.78723	ECSIT	51295	Homo sapiens ECSIT homolog (Drosophila) (ECSIT), mRNA.
ILMN_1808487	0.00278093	2.82763	2.82763	PLA2G12B	84647	Homo sapiens phospholipase A2, group XIIB (PLA2G12B), mRNA.
ILMN_1724352	0.00932171	-2.86146	2.86146	SV2C	22987	Homo sapiens synaptic vesicle glycoprotein 2C (SV2C), mRNA.
ILMN_2124757	0.00873092	2.89133	2.89133	RPL23AP13	56969	Homo sapiens ribosomal protein L23a pseudogene 13 (RPL23AP13), non-coding RNA.
ILMN_1681846	0.00374594	2.9522	2.9522	ZNF540	163255	Homo sapiens zinc finger protein 540 (ZNF540), mRNA.
ILMN_2394552	0.00160988	2.9903	2.9903	WNK3	65267	Homo sapiens WNK lysine deficient protein kinase 3 (WNK3), transcript variant 2, mRNA.
ILMN_1791375	0.00365241	3.24241	3.24241	STAG3L2	442582	Homo sapiens stromal antigen 3-like 2 (STAG3L2), mRNA.
ILMN_1770701	0.00868495	3.26073	3.26073	OR52H1	390067	Homo sapiens olfactory receptor, family 52, subfamily H, member 1 (OR52H1), mRNA.
ILMN_1753648	0.00580798	3.29691	3.29691	SPRYD5	84767	Homo sapiens SPRY domain containing 5 (SPRYD5), mRNA.
ILMN_1729690	0.00519364	-3.4307	3.4307	PPIL2	23759	Homo sapiens peptidylprolyl isomerase (cyclophilin)-like 2 (PPIL2), transcript variant 1, mRNA.
ILMN_1755920	0.000465282	3.64106	3.64106	LOC158381	158381	Homo sapiens hypothetical protein LOC158381 (LOC158381), mRNA.
ILMN_2415634	0.00314441	3.69567	3.69567	TTN	7273	Homo sapiens titin (TTN), transcript variant N2-B, mRNA.
ILMN_2139125	0.00239057	3.72745	3.72745	LRFN5	145581	Homo sapiens leucine rich repeat and fibronectin type III domain containing 5 (LRFN5), mRNA.
ILMN_1730828	0.00539176	-3.77573	3.77573	LOC257358	257358	PREDICTED: Homo sapiens hypothetical protein LOC257358 (LOC257358), misc RNA.
ILMN_1730945	0.00528358	3.92205	3.92205	C19orf4	25789	Homo sapiens chromosome 19 open reading frame 4 (C19orf4), mRNA.
ILMN_2063051	0.00893678	4.05383	4.05383	C11orf55	399879	Homo sapiens chromosome 11 open reading frame 55 (C11orf55), mRNA.
ILMN_2328575	0.00921499	-4.23514	4.23514	CLDN14	23562	Homo sapiens claudin 14 (CLDN14), transcript variant 2, mRNA.
ILMN_2045351	0.00404471	4.52549	4.52549	SPINK9	643394	Homo sapiens serine peptidase inhibitor, Kazal type 9 (SPINK9), mRNA.
ILMN_1692831	0.00315298	4.80641	4.80641	HIST1H1A	3024	Homo sapiens histone 1, H1a (HIST1H1A), mRNA.
ILMN_2343917	0.00248257	4.82999	4.82999	ABCD4	5826	Homo sapiens ATP-binding cassette, sub-family D (ALD), member 4 (ABCD4), transcript variant 2, transcribed RNA.
ILMN_1707943	0.00385891	4.84428	4.84428	C19orf39	126074	Homo sapiens chromosome 19 open reading frame 39 (C19orf39), mRNA.
ILMN_1674373	0.00405391	5.06214	5.06214	C10orf27	219793	Homo sapiens chromosome 10 open reading frame 27 (C10orf27), mRNA.
ILMN_1802766	0.00738086	5.47886	5.47886	WDR40B	139170	Homo sapiens WD repeat domain 40B (WDR40B), mRNA.
ILMN_1705372	0.00372374	5.69013	5.69013	THEG	51298	Homo sapiens Theg homolog (mouse) (THEG), transcript variant 1, mRNA.
ILMN_1680886	0.0067701	-5.90771	5.90771	OR5H15	403274	Homo sapiens olfactory receptor, family 5, subfamily H, member 15 (OR5H15), mRNA.
ILMN_1791171	0.00189496	-6.39437	6.39437	MYEOV2	150678	Homo sapiens myeloma overexpressed 2 (MYEOV2), transcript variant 1, mRNA.
ILMN_1770955	0.00318358	6.73408	6.73408	TREX1	11277	Homo sapiens three prime repair exonuclease 1 (TREX1), transcript variant 2, mRNA.
ILMN_1693530	0.00216006	-6.91985	6.91985	PSG3	5671	Homo sapiens pregnancy specific beta-1-glycoprotein 3 (PSG3), mRNA.
ILMN_1686261	0.00880547	7.07237	7.07237	TOM1L2	146691	Homo sapiens target of myb1-like 2 (chicken) (TOM1L2), transcript variant 3, mRNA.
ILMN_1746788	0.00888418	-10.0064	10.0064	TRIM10	10107	Homo sapiens tripartite motif-containing 10 (TRIM10), transcript variant 2, mRNA.
ILMN_1736357	0.00681069	-14.0037	14.0037	ERMN	57471	Homo sapiens ermin, ERM-like protein (ERMN), transcript variant 1, mRNA.
ILMN_1775045	0.00886643	14.2361	14.2361	ADIPOQ	9370	Homo sapiens adiponectin, C1Q and collagen domain containing (ADIPOQ), mRNA.
ILMN_1703346	0.00333865	-14.2849	14.2849	CHRNE	1145	Homo sapiens cholinergic receptor, nicotinic, epsilon (CHRNE), mRNA.
ILMN_2363127	0.00617633	14.2862	14.2862	C20orf132	140699	Homo sapiens chromosome 20 open reading frame 132 (C20orf132), transcript variant 2, mRNA.
ILMN_1762021	0.00460606	14.9679	14.9679	TRIM48	79097	Homo sapiens tripartite motif-containing 48 (TRIM48), mRNA.
ILMN_1712454	0.00563277	-15.9538	15.9538	LRRC52	440699	Homo sapiens leucine rich repeat containing 52 (LRRC52), mRNA.
ILMN_2390526	0.00971204	16.4685	16.4685	RARB	5915	Homo sapiens retinoic acid receptor, beta (RARB), transcript variant 2, mRNA.
ILMN_1705019	0.00655396	-22.1133	22.1133	GDNF	2668	Homo sapiens glial cell derived neurotrophic factor (GDNF), transcript variant 3, mRNA.
ILMN_1694339	0.00266893	-26.6843	26.6843	TMEM89	440955	Homo sapiens transmembrane protein 89 (TMEM89), mRNA.
ILMN_1787379	0.00179889	-35.7118	35.7118	RETNLB	84666	Homo sapiens resistin like beta (RETNLB), mRNA.
ILMN_1794306	0.00842308	44.1948	44.1948	USP28	57646	Homo sapiens ubiquitin specific peptidase 28 (USP28), mRNA.
ILMN_2105361	0.000156929	49.2043	49.2043	NSBP1	79366	Homo sapiens nucleosomal binding protein 1 (NSBP1), mRNA.
ILMN_1777949	0.00113186	-125.486	125.486	SPRR4	163778	Homo sapiens small proline-rich protein 4 (SPRR4), mRNA.

## Sheet: Supplementary Table S5
Column ID	p-value(Positive vs. Negative)	MeanRatio	FoldChange	Symbol	Entrez_Gene_ID	Definition
ILMN_2289825	0.00336515	-0.00110784	-902.66	ARPP-21	10777	Homo sapiens cyclic AMP-regulated phosphoprotein, 21 kD (ARPP-21), transcript variant 1, mRNA.
ILMN_2084745	0.00273542	0.00128384	-778.911	SLCO1B1	10599	Homo sapiens solute carrier organic anion transporter family, member 1B1 (SLCO1B1), mRNA.
ILMN_1705243	0.00428911	-0.0148829	-67.1913	SERPINA7	6906	Homo sapiens serpin peptidase inhibitor, clade A (alpha-1 antiproteinase, antitrypsin), member 7 (SERPINA7), mRNA.
ILMN_1769547	0.00447499	0.0155624	-64.2573	DIO1	1733	Homo sapiens deiodinase, iodothyronine, type I (DIO1), transcript variant 4, mRNA.
ILMN_1706852	0.000634419	-0.0186065	-53.7448	CSF3	1440	Homo sapiens colony stimulating factor 3 (granulocyte) (CSF3), transcript variant 3, mRNA.
ILMN_2283895	0.00420193	-0.0364516	-27.4337	PCDHA7	56141	Homo sapiens protocadherin alpha 7 (PCDHA7), transcript variant 1, mRNA.
ILMN_2220978	0.00768248	0.0382802	-26.1232	NR0B2	8431	Homo sapiens nuclear receptor subfamily 0, group B, member 2 (NR0B2), mRNA.
ILMN_2226223	0.00224005	0.0471565	-21.206	GJB6	10804	Homo sapiens gap junction protein, beta 6 (GJB6), mRNA.
ILMN_1718420	0.00858365	0.0518972	-19.2689	LCE1D	353134	Homo sapiens late cornified envelope 1D (LCE1D), mRNA.
ILMN_2414786	0.00340823	0.0573262	-17.444	DIO1	1733	Homo sapiens deiodinase, iodothyronine, type I (DIO1), transcript variant 2, mRNA.
ILMN_1678186	0.00704859	0.0581083	-17.2092	ATP6V0A4	50617	Homo sapiens ATPase, H+ transporting, lysosomal V0 subunit a4 (ATP6V0A4), transcript variant 1, mRNA.
ILMN_1767433	0.000695123	-0.0581419	-17.1993	TBC1D5	9779	Homo sapiens TBC1 domain family, member 5 (TBC1D5), mRNA.
ILMN_1765607	0.00542617	-0.0612061	-16.3382	SLC6A2	6530	Homo sapiens solute carrier family 6 (neurotransmitter transporter, noradrenalin), member 2 (SLC6A2), mRNA.
ILMN_1671004	0.00789449	-0.0729347	-13.7109	POLG2	11232	Homo sapiens polymerase (DNA directed), gamma 2, accessory subunit (POLG2), mRNA.
ILMN_2106994	0.00817242	0.0734189	-13.6205	RABIF	5877	Homo sapiens RAB interacting factor (RABIF), mRNA.
ILMN_1720703	0.00503006	0.0754318	-13.257	SLC25A3	5250	Homo sapiens solute carrier family 25 (mitochondrial carrier; phosphate carrier), member 3 (SLC25A3), nuclear gene encoding mitochondrial protein, transcript variant 3, mRNA.
ILMN_1702965	0.00915084	0.0757638	-13.1989	PDE6H	5149	Homo sapiens phosphodiesterase 6H, cGMP-specific, cone, gamma (PDE6H), mRNA.
ILMN_1720947	0.00858636	0.0768372	-13.0145	VCY1B	353513	Homo sapiens variable charge, Y-linked 1B (VCY1B), mRNA.
ILMN_1721523	0.00852446	-0.0826148	-12.1044	B3GNT7	93010	Homo sapiens UDP-GlcNAc:betaGal beta-1,3-N-acetylglucosaminyltransferase 7 (B3GNT7), mRNA.
ILMN_2217601	0.000352707	0.0887009	-11.2738	ANXA9	8416	Homo sapiens annexin A9 (ANXA9), mRNA.
ILMN_1687960	0.00609216	-0.0887745	-11.2645	LIMK2	3985	Homo sapiens LIM domain kinase 2 (LIMK2), transcript variant 2b, mRNA.
ILMN_1678080	0.00719353	0.0925234	-10.8081	FKBP2	2286	Homo sapiens FK506 binding protein 2, 13kDa (FKBP2), transcript variant 2, mRNA.
ILMN_2409451	0.000933815	0.0959474	-10.4224	NCKAP1	10787	Homo sapiens NCK-associated protein 1 (NCKAP1), transcript variant 2, mRNA.
ILMN_1679438	0.00617601	0.101457	-9.85643	MLF1IP	79682	Homo sapiens MLF1 interacting protein (MLF1IP), mRNA.
ILMN_2281881	0.0080818	-0.108935	-9.17978	LRRCC1	85444	Homo sapiens leucine rich repeat and coiled-coil domain containing 1 (LRRCC1), transcript variant 1, mRNA.
ILMN_1731516	0.00961666	0.109899	-9.09927	GJA3	2700	Homo sapiens gap junction protein, alpha 3, 46kDa (GJA3), mRNA.
ILMN_2297196	0.00200587	-0.112273	-8.90686	LRRC4B	94030	Homo sapiens leucine rich repeat containing 4B (LRRC4B), mRNA.
ILMN_2394287	0.00858284	0.118534	-8.43642	ATP6V0A4	50617	Homo sapiens ATPase, H+ transporting, lysosomal V0 subunit a4 (ATP6V0A4), transcript variant 2, mRNA.
ILMN_1725686	0.00612516	-0.128141	-7.80391	OR52M1	119772	Homo sapiens olfactory receptor, family 52, subfamily M, member 1 (OR52M1), mRNA.
ILMN_1683858	0.00170544	-0.129983	-7.69334	EFCAB6	64800	Homo sapiens EF-hand calcium binding domain 6 (EFCAB6), transcript variant 1, mRNA.
ILMN_1701507	0.00237014	0.137441	-7.27585	EHHADH	1962	Homo sapiens enoyl-Coenzyme A, hydratase/3-hydroxyacyl Coenzyme A dehydrogenase (EHHADH), mRNA.
ILMN_1709333	0.00939116	-0.150697	-6.63582	OAS2	4939	Homo sapiens 2'-5'-oligoadenylate synthetase 2, 69/71kDa (OAS2), transcript variant 1, mRNA.
ILMN_2148497	0.00169667	0.152151	-6.57242	C20orf107	388799	Homo sapiens chromosome 20 open reading frame 107 (C20orf107), mRNA.
ILMN_1805725	0.00140215	-0.156151	-6.40404	B4GALNT1	2583	Homo sapiens beta-1,4-N-acetyl-galactosaminyl transferase 1 (B4GALNT1), mRNA.
ILMN_1712608	0.00852121	0.158086	-6.32569	BFSP1	631	Homo sapiens beaded filament structural protein 1, filensin (BFSP1), mRNA.
ILMN_1723268	0.00234871	0.160489	-6.23095	FAIM	55179	Homo sapiens Fas apoptotic inhibitory molecule (FAIM), transcript variant 1, mRNA.
ILMN_1733042	0.00660862	0.168834	-5.92297	BCAS1	8537	Homo sapiens breast carcinoma amplified sequence 1 (BCAS1), mRNA.
ILMN_1691433	0.00666662	0.170142	-5.87744	PIK3R1	5295	Homo sapiens phosphoinositide-3-kinase, regulatory subunit 1 (alpha) (PIK3R1), transcript variant 3, mRNA.
ILMN_1708182	0.0036922	0.173406	-5.76681	ODF1	4956	Homo sapiens outer dense fiber of sperm tails 1 (ODF1), mRNA.
ILMN_1673805	0.00117848	-0.178084	-5.61532	GIP	2695	Homo sapiens gastric inhibitory polypeptide (GIP), mRNA.
ILMN_1688666	0.00766433	0.181054	-5.52323	HIST1H2BH	8345	Homo sapiens histone cluster 1, H2bh (HIST1H2BH), mRNA.
ILMN_1654855	0.00304433	-0.181996	-5.49463	DCX	1641	Homo sapiens doublecortin (DCX), transcript variant 1, mRNA.
ILMN_1815723	0.00765518	0.196495	-5.0892	NUP35	129401	Homo sapiens nucleoporin 35kDa (NUP35), mRNA.
ILMN_1730977	0.000191198	0.216315	-4.62289	SLC44A4	80736	Homo sapiens solute carrier family 44, member 4 (SLC44A4), mRNA.
ILMN_1771201	0.00583007	-0.216983	-4.60866	TNRC6B	23112	Homo sapiens trinucleotide repeat containing 6B (TNRC6B), transcript variant 3, mRNA.
ILMN_1693119	0.000504397	0.223442	-4.47543	LYPD6B	130576	Homo sapiens LY6/PLAUR domain containing 6B (LYPD6B), mRNA.
ILMN_1748836	0.00949026	0.245118	-4.07966	FUZ	80199	Homo sapiens fuzzy homolog (Drosophila) (FUZ), mRNA.
ILMN_2302358	0.00595805	-0.249082	-4.01475	ABCC5	10057	Homo sapiens ATP-binding cassette, sub-family C (CFTR/MRP), member 5 (ABCC5), transcript variant 2, mRNA.
ILMN_2388177	0.00855478	0.255171	-3.91895	SPATA7	55812	Homo sapiens spermatogenesis associated 7 (SPATA7), transcript variant 1, mRNA.
ILMN_1730731	0.00168597	0.256895	-3.89264	ERLIN1	10613	Homo sapiens ER lipid raft associated 1 (ERLIN1), mRNA.
ILMN_1719250	7.04394e-05	0.261012	-3.83123	SLC44A4	80736	Homo sapiens solute carrier family 44, member 4 (SLC44A4), transcript variant 2, mRNA.
ILMN_1708588	0.00664599	-0.261785	-3.81993	ADCY5	111	Homo sapiens adenylate cyclase 5 (ADCY5), mRNA.
ILMN_2271894	0.00242209	0.262948	-3.80303	ZNF654	55279	Homo sapiens zinc finger protein 654 (ZNF654), mRNA.
ILMN_1695468	2.00991e-05	-0.268302	-3.72715	SRPK2	6733	Homo sapiens SFRS protein kinase 2 (SRPK2), transcript variant 1, mRNA.
ILMN_2310909	0.000297443	0.273032	-3.66258	ATP2A3	489	Homo sapiens ATPase, Ca++ transporting, ubiquitous (ATP2A3), transcript variant 2, mRNA.
ILMN_1665335	0.00505113	0.274361	-3.64483	DIABLO	56616	Homo sapiens diablo homolog (Drosophila) (DIABLO), nuclear gene encoding mitochondrial protein, transcript variant 2, mRNA.
ILMN_1656920	0.00108451	0.27513	-3.63464	CRIP1	1396	Homo sapiens cysteine-rich protein 1 (intestinal) (CRIP1), mRNA.
ILMN_1777168	0.00503362	0.27732	-3.60594	CSRP2BP	57325	Homo sapiens CSRP2 binding protein (CSRP2BP), transcript variant 2, mRNA.
ILMN_1803219	0.000451693	0.279274	-3.58071	TMC4	147798	Homo sapiens transmembrane channel-like 4 (TMC4), mRNA.
ILMN_1663519	0.00286097	0.282137	-3.54438	SLC24A3	57419	Homo sapiens solute carrier family 24 (sodium/potassium/calcium exchanger), member 3 (SLC24A3), mRNA.
ILMN_2402556	0.00860232	0.284267	-3.51782	ZHX1	11244	Homo sapiens zinc fingers and homeoboxes 1 (ZHX1), transcript variant 2, mRNA.
ILMN_1803774	0.0046124	0.292411	-3.41984	STK16	8576	Homo sapiens serine/threonine kinase 16 (STK16), transcript variant 1, mRNA.
ILMN_1666019	0.00538708	0.293186	-3.41081	ADNP	23394	Homo sapiens activity-dependent neuroprotector homeobox (ADNP), transcript variant 1, mRNA.
ILMN_2329927	0.00979055	0.294774	-3.39243	ABCG1	9619	Homo sapiens ATP-binding cassette, sub-family G (WHITE), member 1 (ABCG1), transcript variant 2, mRNA.
ILMN_2075507	0.00815892	0.296514	-3.37253	MAN1A2	10905	Homo sapiens mannosidase, alpha, class 1A, member 2 (MAN1A2), mRNA.
ILMN_1775830	0.00236439	0.298245	-3.35294	TM4SF20	79853	Homo sapiens transmembrane 4 L six family member 20 (TM4SF20), mRNA.
ILMN_2405190	0.00497175	-0.299237	-3.34183	VAPA	9218	Homo sapiens VAMP (vesicle-associated membrane protein)-associated protein A, 33kDa (VAPA), transcript variant 2, mRNA.
ILMN_1753457	0.00845146	-0.301785	-3.31362	PKP3	11187	Homo sapiens plakophilin 3 (PKP3), mRNA.
ILMN_1700563	0.000231406	0.304243	-3.28684	ZNF552	79818	Homo sapiens zinc finger protein 552 (ZNF552), mRNA.
ILMN_1707005	0.0074276	0.306664	-3.2609	TCF7	6932	Homo sapiens transcription factor 7 (T-cell specific, HMG-box) (TCF7), transcript variant 3, mRNA.
ILMN_1683313	0.000222753	0.307048	-3.25682	ST3GAL1	6482	Homo sapiens ST3 beta-galactoside alpha-2,3-sialyltransferase 1 (ST3GAL1), transcript variant 1, mRNA.
ILMN_2225698	0.000341341	0.309006	-3.23618	NDUFA10	4705	Homo sapiens NADH dehydrogenase (ubiquinone) 1 alpha subcomplex, 10, 42kDa (NDUFA10), nuclear gene encoding mitochondrial protein, mRNA.
ILMN_1696991	0.00432944	0.309473	-3.2313	DYRK1B	9149	Homo sapiens dual-specificity tyrosine-(Y)-phosphorylation regulated kinase 1B (DYRK1B), transcript variant c, mRNA.
ILMN_1669592	0.00894406	0.310065	-3.22513	40604	51257	Homo sapiens membrane-associated ring finger (C3HC4) 2 (MARCH2), transcript variant 3, mRNA.
ILMN_1698323	0.00309997	0.325001	-3.07692	PLEKHB2	55041	Homo sapiens pleckstrin homology domain containing, family B (evectins) member 2 (PLEKHB2), transcript variant 1, mRNA.
ILMN_2376431	0.00440069	-0.326516	-3.06263	CCR2	1231	Homo sapiens chemokine (C-C motif) receptor 2 (CCR2), transcript variant A, mRNA.
ILMN_1681888	0.00646117	0.328297	-3.04602	PRKAR2A	5576	Homo sapiens protein kinase, cAMP-dependent, regulatory, type II, alpha (PRKAR2A), mRNA.
ILMN_1756878	0.00122047	0.32903	-3.03924	SLC39A9	55334	Homo sapiens solute carrier family 39 (zinc transporter), member 9 (SLC39A9), mRNA.
ILMN_1694323	0.00380744	0.331905	-3.01291	GLE1	2733	Homo sapiens GLE1 RNA export mediator homolog (yeast) (GLE1), transcript variant 1, mRNA.
ILMN_1779711	0.00827941	0.332407	-3.00836	DTL	51514	Homo sapiens denticleless homolog (Drosophila) (DTL), mRNA.
ILMN_2325506	0.00598209	0.332812	-3.0047	BCAS4	55653	Homo sapiens breast carcinoma amplified sequence 4 (BCAS4), transcript variant 1, mRNA.
ILMN_1770653	0.00683237	0.340874	-2.93363	MAL2	114569	Homo sapiens mal, T-cell differentiation protein 2 (MAL2), mRNA.
ILMN_2372398	0.00249085	0.348316	-2.87095	ALDH5A1	7915	Homo sapiens aldehyde dehydrogenase 5 family, member A1 (ALDH5A1), nuclear gene encoding mitochondrial protein, transcript variant 2, mRNA.
ILMN_2140895	0.00943657	-0.349242	-2.86334	OR6W1P	89883	Homo sapiens olfactory receptor, family 6, subfamily W, member 1 pseudogene (OR6W1P), non-coding RNA.
ILMN_2095704	0.00870966	0.351163	-2.84768	SYCP2	10388	Homo sapiens synaptonemal complex protein 2 (SYCP2), mRNA.
ILMN_2041293	0.00216712	0.351634	-2.84386	SQLE	6713	Homo sapiens squalene epoxidase (SQLE), mRNA.
ILMN_1743299	0.00111523	0.358943	-2.78596	PXMP3	5828	Homo sapiens peroxisomal membrane protein 3, 35kDa (PXMP3), transcript variant 1, mRNA.
ILMN_1677574	0.00254668	0.359913	-2.77845	GALNT6	11226	Homo sapiens UDP-N-acetyl-alpha-D-galactosamine:polypeptide N-acetylgalactosaminyltransferase 6 (GalNAc-T6) (GALNT6), mRNA.
ILMN_1677887	0.00429972	0.361263	-2.76807	PMS2	5395	Homo sapiens PMS2 postmeiotic segregation increased 2 (S. cerevisiae) (PMS2), transcript variant 2, transcribed RNA.
ILMN_2396546	0.00376513	0.362112	-2.76158	IGSF3	3321	Homo sapiens immunoglobulin superfamily, member 3 (IGSF3), transcript variant 1, mRNA.
ILMN_1769720	0.000815032	0.362238	-2.76061	STAU2	27067	Homo sapiens staufen, RNA binding protein, homolog 2 (Drosophila) (STAU2), mRNA.
ILMN_1757461	0.00217856	-0.363015	-2.75471	ITIH3	3699	Homo sapiens inter-alpha (globulin) inhibitor H3 (ITIH3), mRNA.
ILMN_2223350	0.00374683	0.364897	-2.7405	C13orf1	57213	Homo sapiens chromosome 13 open reading frame 1 (C13orf1), mRNA.
ILMN_1815718	0.00225334	0.365399	-2.73673	BTRC	8945	Homo sapiens beta-transducin repeat containing (BTRC), transcript variant 1, mRNA.
ILMN_1675156	0.00605767	0.3678	-2.71887	CDC42	998	Homo sapiens cell division cycle 42 (GTP binding protein, 25kDa) (CDC42), transcript variant 3, mRNA.
ILMN_1719232	0.00502132	0.369932	-2.7032	DGCR14	8220	Homo sapiens DiGeorge syndrome critical region gene 14 (DGCR14), mRNA.
ILMN_1701243	0.00419801	0.3704	-2.69978	C10orf2	56652	Homo sapiens chromosome 10 open reading frame 2 (C10orf2), mRNA.
ILMN_1662306	0.00127648	0.372779	-2.68255	RABL3	285282	Homo sapiens RAB, member of RAS oncogene family-like 3 (RABL3), mRNA.
ILMN_1741841	0.00738293	0.373526	-2.67719	KIAA1429	25962	Homo sapiens KIAA1429 (KIAA1429), transcript variant 2, mRNA.
ILMN_2365091	0.00696959	-0.373973	-2.67399	FCAR	2204	Homo sapiens Fc fragment of IgA, receptor for (FCAR), transcript variant 10, mRNA.
ILMN_1727809	0.000356729	0.375822	-2.66084	STK35	140901	Homo sapiens serine/threonine kinase 35 (STK35), mRNA.
ILMN_1754438	0.00117755	-0.37652	-2.6559	SPAM1	6677	Homo sapiens sperm adhesion molecule 1 (PH-20 hyaluronidase, zona pellucida binding) (SPAM1), transcript variant 2, mRNA.
ILMN_1655884	0.000953134	0.382507	-2.61433	ATP2A2	488	Homo sapiens ATPase, Ca++ transporting, cardiac muscle, slow twitch 2 (ATP2A2), transcript variant 1, mRNA.
ILMN_1748614	0.00532327	-0.385301	-2.59537	RELT	84957	Homo sapiens RELT tumor necrosis factor receptor (RELT), transcript variant 2, mRNA.
ILMN_1718424	0.0093721	0.390469	-2.56102	MRPS28	28957	Homo sapiens mitochondrial ribosomal protein S28 (MRPS28), nuclear gene encoding mitochondrial protein, mRNA.
ILMN_2368713	0.00193164	0.392612	-2.54705	TMEM189-UBE2V1	387522	Homo sapiens TMEM189-UBE2V1 readthrough transcript (TMEM189-UBE2V1), transcript variant 2, mRNA.
ILMN_1673676	0.00729907	0.395521	-2.52831	SNX5	27131	Homo sapiens sorting nexin 5 (SNX5), transcript variant 1, mRNA.
ILMN_2354140	1.22193e-05	0.396533	-2.52186	NAT5	51126	Homo sapiens N-acetyltransferase 5 (GCN5-related, putative) (NAT5), transcript variant 3, mRNA.
ILMN_2199284	0.00432931	0.398463	-2.50964	ANAPC7	51434	Homo sapiens anaphase promoting complex subunit 7 (ANAPC7), mRNA.
ILMN_1670807	0.00805379	0.400699	-2.49564	FAM84B	157638	Homo sapiens family with sequence similarity 84, member B (FAM84B), mRNA.
ILMN_2188374	0.00768555	0.401361	-2.49152	XPOT	11260	Homo sapiens exportin, tRNA (nuclear export receptor for tRNAs) (XPOT), mRNA.
ILMN_1812353	0.00509438	0.40164	-2.48979	CSPP1	79848	Homo sapiens centrosome and spindle pole associated protein 1 (CSPP1), transcript variant 1, mRNA.
ILMN_1658083	0.00345773	0.405331	-2.46712	ABT1	29777	Homo sapiens activator of basal transcription 1 (ABT1), mRNA.
ILMN_2131447	0.00454826	-0.40544	-2.46646	LRRC3B	116135	Homo sapiens leucine rich repeat containing 3B (LRRC3B), mRNA.
ILMN_1669142	0.00753326	0.40628	-2.46135	NARG1	80155	Homo sapiens NMDA receptor regulated 1 (NARG1), mRNA.
ILMN_2116075	0.00760019	0.413591	-2.41785	TRUB2	26995	Homo sapiens TruB pseudouridine (psi) synthase homolog 2 (E. coli) (TRUB2), mRNA.
ILMN_1795454	0.00271089	0.414201	-2.41428	CPSF6	11052	Homo sapiens cleavage and polyadenylation specific factor 6, 68kDa (CPSF6), mRNA.
ILMN_1770466	0.00941811	0.414421	-2.41301	ATP5G3	518	Homo sapiens ATP synthase, H+ transporting, mitochondrial F0 complex, subunit C3 (subunit 9) (ATP5G3), nuclear gene encoding mitochondrial protein, transcript variant 3, mRNA.
ILMN_2337058	0.00889627	0.415531	-2.40656	PORCN	64840	Homo sapiens porcupine homolog (Drosophila) (PORCN), transcript variant A, mRNA.
ILMN_1728676	0.000158095	0.417728	-2.3939	KIAA0196	9897	Homo sapiens KIAA0196 (KIAA0196), mRNA.
ILMN_2403730	0.00437639	0.418237	-2.39099	ATP6V1H	51606	Homo sapiens ATPase, H+ transporting, lysosomal 50/57kDa, V1 subunit H (ATP6V1H), transcript variant 2, mRNA.
ILMN_2106449	0.00879558	0.41842	-2.38995	PLEKHF2	79666	Homo sapiens pleckstrin homology domain containing, family F (with FYVE domain) member 2 (PLEKHF2), mRNA.
ILMN_1806314	0.00760246	-0.419268	-2.38511	METTL2A	339175	Homo sapiens methyltransferase like 2A (METTL2A), mRNA.
ILMN_1806386	0.00905474	-0.421721	-2.37124	FAM55D	54827	Homo sapiens family with sequence similarity 55, member D (FAM55D), transcript variant 1, mRNA.
ILMN_1804822	0.00180471	0.423752	-2.35987	SRXN1	140809	Homo sapiens sulfiredoxin 1 homolog (S. cerevisiae) (SRXN1), mRNA.
ILMN_1768393	0.00717419	0.423892	-2.35909	SNRPD1	6632	Homo sapiens small nuclear ribonucleoprotein D1 polypeptide 16kDa (SNRPD1), mRNA.
ILMN_1663446	0.00671498	-0.425429	-2.35057	SORBS1	10580	Homo sapiens sorbin and SH3 domain containing 1 (SORBS1), transcript variant 3, mRNA.
ILMN_2364700	0.00491504	0.42558	-2.34974	ENSA	2029	Homo sapiens endosulfine alpha (ENSA), transcript variant 8, mRNA.
ILMN_1724207	0.00997948	0.427076	-2.34151	IVD	3712	Homo sapiens isovaleryl Coenzyme A dehydrogenase (IVD), nuclear gene encoding mitochondrial protein, mRNA.
ILMN_1781943	0.00906038	0.42901	-2.33095	FAM83D	81610	Homo sapiens family with sequence similarity 83, member D (FAM83D), mRNA.
ILMN_2274571	0.000749877	-0.429508	-2.32824	GAS7	8522	Homo sapiens growth arrest-specific 7 (GAS7), transcript variant a, mRNA.
ILMN_1679600	0.00927916	0.432479	-2.31225	ACOT8	10005	Homo sapiens acyl-CoA thioesterase 8 (ACOT8), transcript variant 1, mRNA.
ILMN_1651496	0.0091787	0.432884	-2.31009	HIST1H2BD	3017	Homo sapiens histone cluster 1, H2bd (HIST1H2BD), transcript variant 2, mRNA.
ILMN_1809433	0.00261841	0.433595	-2.3063	XBP1	7494	Homo sapiens X-box binding protein 1 (XBP1), transcript variant 1, mRNA.
ILMN_2274923	0.00505195	0.435186	-2.29787	MOCS2	4338	Homo sapiens molybdenum cofactor synthesis 2 (MOCS2), transcript variant 1, mRNA.
ILMN_1717975	0.00170783	0.43884	-2.27873	CYHR1	50626	Homo sapiens cysteine/histidine-rich 1 (CYHR1), mRNA.
ILMN_1690049	0.000184669	0.438995	-2.27793	NGDN	25983	Homo sapiens neuroguidin, EIF4E binding protein (NGDN), transcript variant 2, mRNA. XM_941350 XM_945161 XM_945163 XM_945166 XM_945170
ILMN_1799548	0.00766448	-0.441561	-2.26469	WFDC8	90199	Homo sapiens WAP four-disulfide core domain 8 (WFDC8), transcript variant b, mRNA.
ILMN_1769201	0.000738452	0.441852	-2.2632	ELF3	1999	Homo sapiens E74-like factor 3 (ets domain transcription factor, epithelial-specific ) (ELF3), mRNA.
ILMN_1655921	0.00454745	0.442165	-2.2616	GTF2E1	2960	Homo sapiens general transcription factor IIE, polypeptide 1 (alpha subunit, 56kD) (GTF2E1), mRNA.
ILMN_1700477	0.000214357	0.442383	-2.26048	MRPL43	84545	Homo sapiens mitochondrial ribosomal protein L43 (MRPL43), nuclear gene encoding mitochondrial protein, transcript variant 1, mRNA.
ILMN_1694847	0.00474076	0.442872	-2.25799	TERF1	7013	Homo sapiens telomeric repeat binding factor (NIMA-interacting) 1 (TERF1), transcript variant 1, mRNA.
ILMN_1685678	0.00796759	0.444116	-2.25166	EEF1B2	1933	Homo sapiens eukaryotic translation elongation factor 1 beta 2 (EEF1B2), transcript variant 2, mRNA.
ILMN_1786532	0.00219278	0.447097	-2.23665	CNIH	10175	Homo sapiens cornichon homolog (Drosophila) (CNIH), mRNA.
ILMN_1781454	0.0091917	0.448063	-2.23183	RAE1	8480	Homo sapiens RAE1 RNA export 1 homolog (S. pombe) (RAE1), transcript variant 1, mRNA.
ILMN_2410516	0.00651378	0.452471	-2.21009	PPM1A	5494	Homo sapiens protein phosphatase 1A (formerly 2C), magnesium-dependent, alpha isoform (PPM1A), transcript variant 3, mRNA.
ILMN_1812976	0.00958982	0.452733	-2.20881	DDX54	79039	Homo sapiens DEAD (Asp-Glu-Ala-Asp) box polypeptide 54 (DDX54), transcript variant 2, mRNA.
ILMN_1730202	0.00779368	0.457765	-2.18453	MAGEF1	64110	Homo sapiens melanoma antigen family F, 1 (MAGEF1), mRNA.
ILMN_1708502	0.000508	0.458921	-2.17903	AFF4	27125	Homo sapiens AF4/FMR2 family, member 4 (AFF4), mRNA.
ILMN_1683120	0.0021902	0.460921	-2.16957	UNG	7374	Homo sapiens uracil-DNA glycosylase (UNG), nuclear gene encoding mitochondrial protein, transcript variant 1, mRNA.
ILMN_1678652	0.00445264	0.461916	-2.1649	C10orf61	26123	Homo sapiens chromosome 10 open reading frame 61 (C10orf61), transcript variant 1, mRNA.
ILMN_1748719	0.00405908	-0.462192	-2.1636	SEC16B	89866	Homo sapiens SEC16 homolog B (S. cerevisiae) (SEC16B), mRNA.
ILMN_2324157	0.00824496	0.466518	-2.14354	UBA3	9039	Homo sapiens ubiquitin-like modifier activating enzyme 3 (UBA3), transcript variant 2, mRNA.
ILMN_2382121	0.00131121	0.466858	-2.14198	OCRL	4952	Homo sapiens oculocerebrorenal syndrome of Lowe (OCRL), transcript variant b, mRNA.
ILMN_1757384	0.00345305	0.46829	-2.13543	RAN	5901	Homo sapiens RAN, member RAS oncogene family (RAN), mRNA.
ILMN_1694888	0.00211039	0.468326	-2.13527	TAF2	6873	Homo sapiens TAF2 RNA polymerase II, TATA box binding protein (TBP)-associated factor, 150kDa (TAF2), mRNA.
ILMN_1739032	0.0043396	0.469668	-2.12916	TMEM70	54968	Homo sapiens transmembrane protein 70 (TMEM70), transcript variant 1, mRNA.
ILMN_2184640	0.0022206	0.472245	-2.11755	NOLC1	9221	Homo sapiens nucleolar and coiled-body phosphoprotein 1 (NOLC1), mRNA.
ILMN_1773576	0.000460087	0.474718	-2.10651	CPNE3	8895	Homo sapiens copine III (CPNE3), mRNA.
ILMN_1779423	0.00479965	0.478145	-2.09142	MRPS14	63931	Homo sapiens mitochondrial ribosomal protein S14 (MRPS14), nuclear gene encoding mitochondrial protein, mRNA.
ILMN_1674038	0.00270135	0.47819	-2.09122	CTSD	1509	Homo sapiens cathepsin D (CTSD), mRNA.
ILMN_1697614	0.0019934	0.481957	-2.07487	NHP2L1	4809	Homo sapiens NHP2 non-histone chromosome protein 2-like 1 (S. cerevisiae) (NHP2L1), transcript variant 2, mRNA.
ILMN_1685602	0.00299649	0.488005	-2.04916	TMEM41A	90407	Homo sapiens transmembrane protein 41A (TMEM41A), mRNA.
ILMN_1798172	0.000575779	0.489663	-2.04222	IPO4	79711	Homo sapiens importin 4 (IPO4), mRNA.
ILMN_1804988	0.0040802	0.490635	-2.03817	MOAP1	64112	Homo sapiens modulator of apoptosis 1 (MOAP1), mRNA.
ILMN_1801928	0.0021822	0.492569	-2.03017	YWHAZ	7534	Homo sapiens tyrosine 3-monooxygenase/tryptophan 5-monooxygenase activation protein, zeta polypeptide (YWHAZ), transcript variant 1, mRNA.
ILMN_2066020	0.00177136	0.493796	-2.02513	TCEB1	6921	Homo sapiens transcription elongation factor B (SIII), polypeptide 1 (15kDa, elongin C) (TCEB1), mRNA.
ILMN_1754421	0.00811241	0.494723	-2.02133	NDUFAF1	51103	Homo sapiens NADH dehydrogenase (ubiquinone) 1 alpha subcomplex, assembly factor 1 (NDUFAF1), mRNA.
